# Supplementary material for: Transcriptome Analysis Suggests the Roles of Long Intergenic Non-coding RNAs in the Growth Performance of Weaned Piglets
Source: Front Genet. 2019 Mar 18;10:196. doi: 10.3389/fgene.2019.00196 (PMC6431659; doi:10.3389/fgene.2019.00196)
Supplement: TABLE S3 — GTF of lincRNA gene. [file Table_3.XLSX]

## Sheet: lincRNA_GTF
1	StringTie	transcript	225403	227903	1000	-	.	gene_id "MSTRG.5"; transcript_id "MSTRG.5.1";
1	StringTie	exon	225403	226830	1000	-	.	gene_id "MSTRG.5"; transcript_id "MSTRG.5.1"; exon_number "1";
1	StringTie	exon	227383	227903	1000	-	.	gene_id "MSTRG.5"; transcript_id "MSTRG.5.1"; exon_number "2";
1	StringTie	transcript	387998	391601	1000	+	.	gene_id "MSTRG.8"; transcript_id "MSTRG.8.1";
1	StringTie	exon	387998	388248	1000	+	.	gene_id "MSTRG.8"; transcript_id "MSTRG.8.1"; exon_number "1";
1	StringTie	exon	391524	391601	1000	+	.	gene_id "MSTRG.8"; transcript_id "MSTRG.8.1"; exon_number "2";
1	StringTie	transcript	230212	235688	1000	+	.	gene_id "MSTRG.9"; transcript_id "MSTRG.9.1";
1	StringTie	exon	230212	230633	1000	+	.	gene_id "MSTRG.9"; transcript_id "MSTRG.9.1"; exon_number "1";
1	StringTie	exon	234722	235688	1000	+	.	gene_id "MSTRG.9"; transcript_id "MSTRG.9.1"; exon_number "2";
1	StringTie	transcript	230778	235311	1000	+	.	gene_id "MSTRG.9"; transcript_id "MSTRG.9.2";
1	StringTie	exon	230778	230936	1000	+	.	gene_id "MSTRG.9"; transcript_id "MSTRG.9.2"; exon_number "1";
1	StringTie	exon	234722	235311	1000	+	.	gene_id "MSTRG.9"; transcript_id "MSTRG.9.2"; exon_number "2";
1	StringTie	transcript	394911	396416	1000	+	.	gene_id "MSTRG.12"; transcript_id "MSTRG.12.1";
1	StringTie	exon	394911	394970	1000	+	.	gene_id "MSTRG.12"; transcript_id "MSTRG.12.1"; exon_number "1";
1	StringTie	exon	395958	396416	1000	+	.	gene_id "MSTRG.12"; transcript_id "MSTRG.12.1"; exon_number "2";
1	StringTie	transcript	1698842	1700633	1000	+	.	gene_id "MSTRG.56"; transcript_id "MSTRG.56.1";
1	StringTie	exon	1698842	1698946	1000	+	.	gene_id "MSTRG.56"; transcript_id "MSTRG.56.1"; exon_number "1";
1	StringTie	exon	1699917	1700633	1000	+	.	gene_id "MSTRG.56"; transcript_id "MSTRG.56.1"; exon_number "2";
1	StringTie	transcript	1698858	1709732	1000	+	.	gene_id "MSTRG.56"; transcript_id "MSTRG.56.2";
1	StringTie	exon	1698858	1698946	1000	+	.	gene_id "MSTRG.56"; transcript_id "MSTRG.56.2"; exon_number "1";
1	StringTie	exon	1707172	1709732	1000	+	.	gene_id "MSTRG.56"; transcript_id "MSTRG.56.2"; exon_number "2";
1	StringTie	transcript	1698889	1700127	1000	+	.	gene_id "MSTRG.56"; transcript_id "MSTRG.56.3";
1	StringTie	exon	1698889	1698999	1000	+	.	gene_id "MSTRG.56"; transcript_id "MSTRG.56.3"; exon_number "1";
1	StringTie	exon	1699917	1700127	1000	+	.	gene_id "MSTRG.56"; transcript_id "MSTRG.56.3"; exon_number "2";
1	StringTie	transcript	4321009	4325059	1000	+	.	gene_id "MSTRG.81"; transcript_id "MSTRG.81.1";
1	StringTie	exon	4321009	4321192	1000	+	.	gene_id "MSTRG.81"; transcript_id "MSTRG.81.1"; exon_number "1";
1	StringTie	exon	4322916	4325059	1000	+	.	gene_id "MSTRG.81"; transcript_id "MSTRG.81.1"; exon_number "2";
1	StringTie	transcript	4949384	4951455	1000	+	.	gene_id "MSTRG.101"; transcript_id "MSTRG.101.1";
1	StringTie	exon	4949384	4949609	1000	+	.	gene_id "MSTRG.101"; transcript_id "MSTRG.101.1"; exon_number "1";
1	StringTie	exon	4951278	4951455	1000	+	.	gene_id "MSTRG.101"; transcript_id "MSTRG.101.1"; exon_number "2";
1	StringTie	transcript	5609480	5611073	1000	-	.	gene_id "MSTRG.106"; transcript_id "MSTRG.106.1";
1	StringTie	exon	5609480	5609766	1000	-	.	gene_id "MSTRG.106"; transcript_id "MSTRG.106.1"; exon_number "1";
1	StringTie	exon	5611025	5611073	1000	-	.	gene_id "MSTRG.106"; transcript_id "MSTRG.106.1"; exon_number "2";
1	StringTie	transcript	7207943	7209196	1000	+	.	gene_id "MSTRG.114"; transcript_id "MSTRG.114.1";
1	StringTie	exon	7207943	7208140	1000	+	.	gene_id "MSTRG.114"; transcript_id "MSTRG.114.1"; exon_number "1";
1	StringTie	exon	7209065	7209196	1000	+	.	gene_id "MSTRG.114"; transcript_id "MSTRG.114.1"; exon_number "2";
1	StringTie	transcript	8349281	8350299	1000	+	.	gene_id "MSTRG.137"; transcript_id "MSTRG.137.1";
1	StringTie	exon	8349281	8349322	1000	+	.	gene_id "MSTRG.137"; transcript_id "MSTRG.137.1"; exon_number "1";
1	StringTie	exon	8350127	8350299	1000	+	.	gene_id "MSTRG.137"; transcript_id "MSTRG.137.1"; exon_number "2";
1	StringTie	transcript	11892302	11897819	1000	-	.	gene_id "MSTRG.179"; transcript_id "MSTRG.179.2";
1	StringTie	exon	11892302	11892449	1000	-	.	gene_id "MSTRG.179"; transcript_id "MSTRG.179.2"; exon_number "1";
1	StringTie	exon	11897751	11897819	1000	-	.	gene_id "MSTRG.179"; transcript_id "MSTRG.179.2"; exon_number "2";
1	StringTie	transcript	14852237	14863181	1000	-	.	gene_id "MSTRG.191"; transcript_id "MSTRG.191.2";
1	StringTie	exon	14852237	14852268	1000	-	.	gene_id "MSTRG.191"; transcript_id "MSTRG.191.2"; exon_number "1";
1	StringTie	exon	14857645	14863181	1000	-	.	gene_id "MSTRG.191"; transcript_id "MSTRG.191.2"; exon_number "2";
1	StringTie	transcript	16653463	16681497	1000	-	.	gene_id "MSTRG.220"; transcript_id "MSTRG.220.1";
1	StringTie	exon	16653463	16653743	1000	-	.	gene_id "MSTRG.220"; transcript_id "MSTRG.220.1"; exon_number "1";
1	StringTie	exon	16681212	16681497	1000	-	.	gene_id "MSTRG.220"; transcript_id "MSTRG.220.1"; exon_number "2";
1	StringTie	transcript	16659471	16681486	1000	-	.	gene_id "MSTRG.220"; transcript_id "MSTRG.220.2";
1	StringTie	exon	16659471	16659611	1000	-	.	gene_id "MSTRG.220"; transcript_id "MSTRG.220.2"; exon_number "1";
1	StringTie	exon	16681212	16681486	1000	-	.	gene_id "MSTRG.220"; transcript_id "MSTRG.220.2"; exon_number "2";
1	StringTie	transcript	16675359	16681486	1000	-	.	gene_id "MSTRG.220"; transcript_id "MSTRG.220.3";
1	StringTie	exon	16675359	16675725	1000	-	.	gene_id "MSTRG.220"; transcript_id "MSTRG.220.3"; exon_number "1";
1	StringTie	exon	16681212	16681486	1000	-	.	gene_id "MSTRG.220"; transcript_id "MSTRG.220.3"; exon_number "2";
1	StringTie	transcript	14124278	14130746	1000	-	.	gene_id "MSTRG.235"; transcript_id "MSTRG.235.1";
1	StringTie	exon	14124278	14125968	1000	-	.	gene_id "MSTRG.235"; transcript_id "MSTRG.235.1"; exon_number "1";
1	StringTie	exon	14126122	14126218	1000	-	.	gene_id "MSTRG.235"; transcript_id "MSTRG.235.1"; exon_number "2";
1	StringTie	exon	14126787	14126951	1000	-	.	gene_id "MSTRG.235"; transcript_id "MSTRG.235.1"; exon_number "3";
1	StringTie	exon	14127322	14127493	1000	-	.	gene_id "MSTRG.235"; transcript_id "MSTRG.235.1"; exon_number "4";
1	StringTie	exon	14130461	14130746	1000	-	.	gene_id "MSTRG.235"; transcript_id "MSTRG.235.1"; exon_number "5";
1	StringTie	transcript	21087763	21096390	1000	-	.	gene_id "MSTRG.279"; transcript_id "MSTRG.279.1";
1	StringTie	exon	21087763	21087861	1000	-	.	gene_id "MSTRG.279"; transcript_id "MSTRG.279.1"; exon_number "1";
1	StringTie	exon	21096098	21096390	1000	-	.	gene_id "MSTRG.279"; transcript_id "MSTRG.279.1"; exon_number "2";
1	StringTie	transcript	22495508	22498601	1000	-	.	gene_id "MSTRG.304"; transcript_id "MSTRG.304.1";
1	StringTie	exon	22495508	22495661	1000	-	.	gene_id "MSTRG.304"; transcript_id "MSTRG.304.1"; exon_number "1";
1	StringTie	exon	22498503	22498601	1000	-	.	gene_id "MSTRG.304"; transcript_id "MSTRG.304.1"; exon_number "2";
1	StringTie	transcript	26966947	26972571	1000	+	.	gene_id "MSTRG.328"; transcript_id "MSTRG.328.1";
1	StringTie	exon	26966947	26967120	1000	+	.	gene_id "MSTRG.328"; transcript_id "MSTRG.328.1"; exon_number "1";
1	StringTie	exon	26972282	26972571	1000	+	.	gene_id "MSTRG.328"; transcript_id "MSTRG.328.1"; exon_number "2";
1	StringTie	transcript	27934591	27941406	1000	-	.	gene_id "MSTRG.335"; transcript_id "MSTRG.335.1";
1	StringTie	exon	27934591	27935309	1000	-	.	gene_id "MSTRG.335"; transcript_id "MSTRG.335.1"; exon_number "1";
1	StringTie	exon	27940830	27941406	1000	-	.	gene_id "MSTRG.335"; transcript_id "MSTRG.335.1"; exon_number "2";
1	StringTie	transcript	29377563	29380013	1000	-	.	gene_id "MSTRG.354"; transcript_id "MSTRG.354.1";
1	StringTie	exon	29377563	29378073	1000	-	.	gene_id "MSTRG.354"; transcript_id "MSTRG.354.1"; exon_number "1";
1	StringTie	exon	29378600	29378743	1000	-	.	gene_id "MSTRG.354"; transcript_id "MSTRG.354.1"; exon_number "2";
1	StringTie	exon	29379855	29380013	1000	-	.	gene_id "MSTRG.354"; transcript_id "MSTRG.354.1"; exon_number "3";
1	StringTie	transcript	30641130	30645076	1000	-	.	gene_id "MSTRG.362"; transcript_id "MSTRG.362.1";
1	StringTie	exon	30641130	30641483	1000	-	.	gene_id "MSTRG.362"; transcript_id "MSTRG.362.1"; exon_number "1";
1	StringTie	exon	30645010	30645076	1000	-	.	gene_id "MSTRG.362"; transcript_id "MSTRG.362.1"; exon_number "2";
1	StringTie	transcript	30776369	30788127	1000	+	.	gene_id "MSTRG.363"; transcript_id "MSTRG.363.1";
1	StringTie	exon	30776369	30776606	1000	+	.	gene_id "MSTRG.363"; transcript_id "MSTRG.363.1"; exon_number "1";
1	StringTie	exon	30780720	30788127	1000	+	.	gene_id "MSTRG.363"; transcript_id "MSTRG.363.1"; exon_number "2";
1	StringTie	transcript	35927044	35927360	1000	+	.	gene_id "MSTRG.403"; transcript_id "MSTRG.403.2";
1	StringTie	exon	35927044	35927110	1000	+	.	gene_id "MSTRG.403"; transcript_id "MSTRG.403.2"; exon_number "1";
1	StringTie	exon	35927199	35927360	1000	+	.	gene_id "MSTRG.403"; transcript_id "MSTRG.403.2"; exon_number "2";
1	StringTie	transcript	40625650	40638691	1000	+	.	gene_id "MSTRG.435"; transcript_id "MSTRG.435.1";
1	StringTie	exon	40625650	40625693	1000	+	.	gene_id "MSTRG.435"; transcript_id "MSTRG.435.1"; exon_number "1";
1	StringTie	exon	40638502	40638691	1000	+	.	gene_id "MSTRG.435"; transcript_id "MSTRG.435.1"; exon_number "2";
1	StringTie	transcript	44557848	44662609	1000	+	.	gene_id "MSTRG.464"; transcript_id "MSTRG.464.1";
1	StringTie	exon	44557848	44558034	1000	+	.	gene_id "MSTRG.464"; transcript_id "MSTRG.464.1"; exon_number "1";
1	StringTie	exon	44576914	44577014	1000	+	.	gene_id "MSTRG.464"; transcript_id "MSTRG.464.1"; exon_number "2";
1	StringTie	exon	44618622	44618679	1000	+	.	gene_id "MSTRG.464"; transcript_id "MSTRG.464.1"; exon_number "3";
1	StringTie	exon	44655159	44655199	1000	+	.	gene_id "MSTRG.464"; transcript_id "MSTRG.464.1"; exon_number "4";
1	StringTie	exon	44662284	44662609	1000	+	.	gene_id "MSTRG.464"; transcript_id "MSTRG.464.1"; exon_number "5";
1	StringTie	transcript	44557882	44761442	1000	+	.	gene_id "MSTRG.464"; transcript_id "MSTRG.464.2";
1	StringTie	exon	44557882	44558034	1000	+	.	gene_id "MSTRG.464"; transcript_id "MSTRG.464.2"; exon_number "1";
1	StringTie	exon	44576914	44577014	1000	+	.	gene_id "MSTRG.464"; transcript_id "MSTRG.464.2"; exon_number "2";
1	StringTie	exon	44618622	44618679	1000	+	.	gene_id "MSTRG.464"; transcript_id "MSTRG.464.2"; exon_number "3";
1	StringTie	exon	44760638	44761442	1000	+	.	gene_id "MSTRG.464"; transcript_id "MSTRG.464.2"; exon_number "4";
1	StringTie	transcript	44557919	44655498	1000	+	.	gene_id "MSTRG.464"; transcript_id "MSTRG.464.3";
1	StringTie	exon	44557919	44558034	1000	+	.	gene_id "MSTRG.464"; transcript_id "MSTRG.464.3"; exon_number "1";
1	StringTie	exon	44618622	44618679	1000	+	.	gene_id "MSTRG.464"; transcript_id "MSTRG.464.3"; exon_number "2";
1	StringTie	exon	44655159	44655498	1000	+	.	gene_id "MSTRG.464"; transcript_id "MSTRG.464.3"; exon_number "3";
1	StringTie	transcript	44557926	44623413	1000	+	.	gene_id "MSTRG.464"; transcript_id "MSTRG.464.4";
1	StringTie	exon	44557926	44558034	1000	+	.	gene_id "MSTRG.464"; transcript_id "MSTRG.464.4"; exon_number "1";
1	StringTie	exon	44576914	44577014	1000	+	.	gene_id "MSTRG.464"; transcript_id "MSTRG.464.4"; exon_number "2";
1	StringTie	exon	44618622	44618679	1000	+	.	gene_id "MSTRG.464"; transcript_id "MSTRG.464.4"; exon_number "3";
1	StringTie	exon	44623388	44623413	1000	+	.	gene_id "MSTRG.464"; transcript_id "MSTRG.464.4"; exon_number "4";
1	StringTie	transcript	51361991	51368951	1000	-	.	gene_id "MSTRG.500"; transcript_id "MSTRG.500.6";
1	StringTie	exon	51361991	51364332	1000	-	.	gene_id "MSTRG.500"; transcript_id "MSTRG.500.6"; exon_number "1";
1	StringTie	exon	51365475	51368951	1000	-	.	gene_id "MSTRG.500"; transcript_id "MSTRG.500.6"; exon_number "2";
1	StringTie	transcript	52545757	52559009	1000	+	.	gene_id "MSTRG.510"; transcript_id "MSTRG.510.11";
1	StringTie	exon	52545757	52545861	1000	+	.	gene_id "MSTRG.510"; transcript_id "MSTRG.510.11"; exon_number "1";
1	StringTie	exon	52556726	52556798	1000	+	.	gene_id "MSTRG.510"; transcript_id "MSTRG.510.11"; exon_number "2";
1	StringTie	exon	52557861	52559009	1000	+	.	gene_id "MSTRG.510"; transcript_id "MSTRG.510.11"; exon_number "3";
1	StringTie	transcript	54627549	54632118	1000	+	.	gene_id "MSTRG.526"; transcript_id "MSTRG.526.1";
1	StringTie	exon	54627549	54629371	1000	+	.	gene_id "MSTRG.526"; transcript_id "MSTRG.526.1"; exon_number "1";
1	StringTie	exon	54630597	54632118	1000	+	.	gene_id "MSTRG.526"; transcript_id "MSTRG.526.1"; exon_number "2";
1	StringTie	transcript	71417927	71421233	1000	+	.	gene_id "MSTRG.607"; transcript_id "MSTRG.607.1";
1	StringTie	exon	71417927	71418040	1000	+	.	gene_id "MSTRG.607"; transcript_id "MSTRG.607.1"; exon_number "1";
1	StringTie	exon	71421003	71421233	1000	+	.	gene_id "MSTRG.607"; transcript_id "MSTRG.607.1"; exon_number "2";
1	StringTie	transcript	74762479	74768671	1000	+	.	gene_id "MSTRG.645"; transcript_id "MSTRG.645.1";
1	StringTie	exon	74762479	74762608	1000	+	.	gene_id "MSTRG.645"; transcript_id "MSTRG.645.1"; exon_number "1";
1	StringTie	exon	74766067	74766204	1000	+	.	gene_id "MSTRG.645"; transcript_id "MSTRG.645.1"; exon_number "2";
1	StringTie	exon	74768161	74768671	1000	+	.	gene_id "MSTRG.645"; transcript_id "MSTRG.645.1"; exon_number "3";
1	StringTie	transcript	77540756	77557199	1000	+	.	gene_id "MSTRG.681"; transcript_id "MSTRG.681.1";
1	StringTie	exon	77540756	77541087	1000	+	.	gene_id "MSTRG.681"; transcript_id "MSTRG.681.1"; exon_number "1";
1	StringTie	exon	77543103	77543864	1000	+	.	gene_id "MSTRG.681"; transcript_id "MSTRG.681.1"; exon_number "2";
1	StringTie	exon	77557154	77557199	1000	+	.	gene_id "MSTRG.681"; transcript_id "MSTRG.681.1"; exon_number "3";
1	StringTie	transcript	77417910	77426223	1000	+	.	gene_id "MSTRG.694"; transcript_id "MSTRG.694.1";
1	StringTie	exon	77417910	77418578	1000	+	.	gene_id "MSTRG.694"; transcript_id "MSTRG.694.1"; exon_number "1";
1	StringTie	exon	77424234	77426223	1000	+	.	gene_id "MSTRG.694"; transcript_id "MSTRG.694.1"; exon_number "2";
1	StringTie	transcript	77424147	77426082	1000	+	.	gene_id "MSTRG.694"; transcript_id "MSTRG.694.2";
1	StringTie	exon	77424147	77425121	1000	+	.	gene_id "MSTRG.694"; transcript_id "MSTRG.694.2"; exon_number "1";
1	StringTie	exon	77425845	77426082	1000	+	.	gene_id "MSTRG.694"; transcript_id "MSTRG.694.2"; exon_number "2";
1	StringTie	transcript	79552943	79557095	1000	-	.	gene_id "MSTRG.700"; transcript_id "MSTRG.700.1";
1	StringTie	exon	79552943	79555278	1000	-	.	gene_id "MSTRG.700"; transcript_id "MSTRG.700.1"; exon_number "1";
1	StringTie	exon	79557036	79557095	1000	-	.	gene_id "MSTRG.700"; transcript_id "MSTRG.700.1"; exon_number "2";
1	StringTie	transcript	79783220	79787477	1000	-	.	gene_id "MSTRG.701"; transcript_id "MSTRG.701.1";
1	StringTie	exon	79783220	79783747	1000	-	.	gene_id "MSTRG.701"; transcript_id "MSTRG.701.1"; exon_number "1";
1	StringTie	exon	79784357	79784494	1000	-	.	gene_id "MSTRG.701"; transcript_id "MSTRG.701.1"; exon_number "2";
1	StringTie	exon	79786552	79786672	1000	-	.	gene_id "MSTRG.701"; transcript_id "MSTRG.701.1"; exon_number "3";
1	StringTie	exon	79787168	79787477	1000	-	.	gene_id "MSTRG.701"; transcript_id "MSTRG.701.1"; exon_number "4";
1	StringTie	transcript	87330442	87349459	1000	+	.	gene_id "MSTRG.754"; transcript_id "MSTRG.754.1";
1	StringTie	exon	87330442	87330510	1000	+	.	gene_id "MSTRG.754"; transcript_id "MSTRG.754.1"; exon_number "1";
1	StringTie	exon	87349326	87349459	1000	+	.	gene_id "MSTRG.754"; transcript_id "MSTRG.754.1"; exon_number "2";
1	StringTie	transcript	107150103	107154189	1000	-	.	gene_id "MSTRG.885"; transcript_id "MSTRG.885.3";
1	StringTie	exon	107150103	107150369	1000	-	.	gene_id "MSTRG.885"; transcript_id "MSTRG.885.3"; exon_number "1";
1	StringTie	exon	107153928	107154189	1000	-	.	gene_id "MSTRG.885"; transcript_id "MSTRG.885.3"; exon_number "2";
1	StringTie	transcript	107150220	107163826	1000	-	.	gene_id "MSTRG.885"; transcript_id "MSTRG.885.5";
1	StringTie	exon	107150220	107150369	1000	-	.	gene_id "MSTRG.885"; transcript_id "MSTRG.885.5"; exon_number "1";
1	StringTie	exon	107154456	107154595	1000	-	.	gene_id "MSTRG.885"; transcript_id "MSTRG.885.5"; exon_number "2";
1	StringTie	exon	107163803	107163826	1000	-	.	gene_id "MSTRG.885"; transcript_id "MSTRG.885.5"; exon_number "3";
1	StringTie	transcript	106933218	106963962	1000	+	.	gene_id "MSTRG.895"; transcript_id "MSTRG.895.1";
1	StringTie	exon	106933218	106933434	1000	+	.	gene_id "MSTRG.895"; transcript_id "MSTRG.895.1"; exon_number "1";
1	StringTie	exon	106963094	106963962	1000	+	.	gene_id "MSTRG.895"; transcript_id "MSTRG.895.1"; exon_number "2";
1	StringTie	transcript	108595577	108627282	1000	-	.	gene_id "MSTRG.914"; transcript_id "MSTRG.914.1";
1	StringTie	exon	108595577	108595862	1000	-	.	gene_id "MSTRG.914"; transcript_id "MSTRG.914.1"; exon_number "1";
1	StringTie	exon	108627168	108627282	1000	-	.	gene_id "MSTRG.914"; transcript_id "MSTRG.914.1"; exon_number "2";
1	StringTie	transcript	123412366	123419037	1000	-	.	gene_id "MSTRG.1074"; transcript_id "MSTRG.1074.1";
1	StringTie	exon	123412366	123414059	1000	-	.	gene_id "MSTRG.1074"; transcript_id "MSTRG.1074.1"; exon_number "1";
1	StringTie	exon	123418993	123419037	1000	-	.	gene_id "MSTRG.1074"; transcript_id "MSTRG.1074.1"; exon_number "2";
1	StringTie	transcript	122577901	122579419	1000	+	.	gene_id "MSTRG.1088"; transcript_id "MSTRG.1088.1";
1	StringTie	exon	122577901	122578345	1000	+	.	gene_id "MSTRG.1088"; transcript_id "MSTRG.1088.1"; exon_number "1";
1	StringTie	exon	122579360	122579419	1000	+	.	gene_id "MSTRG.1088"; transcript_id "MSTRG.1088.1"; exon_number "2";
1	StringTie	transcript	127937046	127938478	1000	+	.	gene_id "MSTRG.1151"; transcript_id "MSTRG.1151.1";
1	StringTie	exon	127937046	127937173	1000	+	.	gene_id "MSTRG.1151"; transcript_id "MSTRG.1151.1"; exon_number "1";
1	StringTie	exon	127937414	127937489	1000	+	.	gene_id "MSTRG.1151"; transcript_id "MSTRG.1151.1"; exon_number "2";
1	StringTie	exon	127937984	127938478	1000	+	.	gene_id "MSTRG.1151"; transcript_id "MSTRG.1151.1"; exon_number "3";
1	StringTie	transcript	132190405	132268564	1000	-	.	gene_id "MSTRG.1240"; transcript_id "MSTRG.1240.1";
1	StringTie	exon	132190405	132190551	1000	-	.	gene_id "MSTRG.1240"; transcript_id "MSTRG.1240.1"; exon_number "1";
1	StringTie	exon	132263316	132263463	1000	-	.	gene_id "MSTRG.1240"; transcript_id "MSTRG.1240.1"; exon_number "2";
1	StringTie	exon	132268478	132268564	1000	-	.	gene_id "MSTRG.1240"; transcript_id "MSTRG.1240.1"; exon_number "3";
1	StringTie	transcript	132197342	132268559	1000	-	.	gene_id "MSTRG.1240"; transcript_id "MSTRG.1240.2";
1	StringTie	exon	132197342	132197434	1000	-	.	gene_id "MSTRG.1240"; transcript_id "MSTRG.1240.2"; exon_number "1";
1	StringTie	exon	132263316	132263463	1000	-	.	gene_id "MSTRG.1240"; transcript_id "MSTRG.1240.2"; exon_number "2";
1	StringTie	exon	132268478	132268559	1000	-	.	gene_id "MSTRG.1240"; transcript_id "MSTRG.1240.2"; exon_number "3";
1	StringTie	transcript	132196259	132228028	1000	+	.	gene_id "MSTRG.1241"; transcript_id "MSTRG.1241.1";
1	StringTie	exon	132196259	132196385	1000	+	.	gene_id "MSTRG.1241"; transcript_id "MSTRG.1241.1"; exon_number "1";
1	StringTie	exon	132227943	132228028	1000	+	.	gene_id "MSTRG.1241"; transcript_id "MSTRG.1241.1"; exon_number "2";
1	StringTie	transcript	138250218	138254891	1000	-	.	gene_id "MSTRG.1300"; transcript_id "MSTRG.1300.1";
1	StringTie	exon	138250218	138250684	1000	-	.	gene_id "MSTRG.1300"; transcript_id "MSTRG.1300.1"; exon_number "1";
1	StringTie	exon	138254853	138254891	1000	-	.	gene_id "MSTRG.1300"; transcript_id "MSTRG.1300.1"; exon_number "2";
1	StringTie	transcript	138255461	138257590	1000	+	.	gene_id "MSTRG.1301"; transcript_id "MSTRG.1301.1";
1	StringTie	exon	138255461	138255528	1000	+	.	gene_id "MSTRG.1301"; transcript_id "MSTRG.1301.1"; exon_number "1";
1	StringTie	exon	138257228	138257590	1000	+	.	gene_id "MSTRG.1301"; transcript_id "MSTRG.1301.1"; exon_number "2";
1	StringTie	transcript	138261472	138263255	1000	+	.	gene_id "MSTRG.1303"; transcript_id "MSTRG.1303.1";
1	StringTie	exon	138261472	138261645	1000	+	.	gene_id "MSTRG.1303"; transcript_id "MSTRG.1303.1"; exon_number "1";
1	StringTie	exon	138262150	138263255	1000	+	.	gene_id "MSTRG.1303"; transcript_id "MSTRG.1303.1"; exon_number "2";
1	StringTie	transcript	152462533	152464610	1000	-	.	gene_id "MSTRG.1379"; transcript_id "MSTRG.1379.1";
1	StringTie	exon	152462533	152462717	1000	-	.	gene_id "MSTRG.1379"; transcript_id "MSTRG.1379.1"; exon_number "1";
1	StringTie	exon	152464492	152464610	1000	-	.	gene_id "MSTRG.1379"; transcript_id "MSTRG.1379.1"; exon_number "2";
1	StringTie	transcript	179788955	179799801	1000	+	.	gene_id "MSTRG.1592"; transcript_id "MSTRG.1592.1";
1	StringTie	exon	179788955	179789013	1000	+	.	gene_id "MSTRG.1592"; transcript_id "MSTRG.1592.1"; exon_number "1";
1	StringTie	exon	179798462	179798579	1000	+	.	gene_id "MSTRG.1592"; transcript_id "MSTRG.1592.1"; exon_number "2";
1	StringTie	exon	179799527	179799801	1000	+	.	gene_id "MSTRG.1592"; transcript_id "MSTRG.1592.1"; exon_number "3";
1	StringTie	transcript	180153314	180162757	1000	+	.	gene_id "MSTRG.1612"; transcript_id "MSTRG.1612.1";
1	StringTie	exon	180153314	180153417	1000	+	.	gene_id "MSTRG.1612"; transcript_id "MSTRG.1612.1"; exon_number "1";
1	StringTie	exon	180156032	180156210	1000	+	.	gene_id "MSTRG.1612"; transcript_id "MSTRG.1612.1"; exon_number "2";
1	StringTie	exon	180162318	180162757	1000	+	.	gene_id "MSTRG.1612"; transcript_id "MSTRG.1612.1"; exon_number "3";
1	StringTie	transcript	183481109	183578429	1000	-	.	gene_id "MSTRG.1653"; transcript_id "MSTRG.1653.1";
1	StringTie	exon	183481109	183481147	1000	-	.	gene_id "MSTRG.1653"; transcript_id "MSTRG.1653.1"; exon_number "1";
1	StringTie	exon	183496560	183496674	1000	-	.	gene_id "MSTRG.1653"; transcript_id "MSTRG.1653.1"; exon_number "2";
1	StringTie	exon	183578351	183578429	1000	-	.	gene_id "MSTRG.1653"; transcript_id "MSTRG.1653.1"; exon_number "3";
1	StringTie	transcript	183863434	183868099	1000	+	.	gene_id "MSTRG.1662"; transcript_id "MSTRG.1662.1";
1	StringTie	exon	183863434	183863629	1000	+	.	gene_id "MSTRG.1662"; transcript_id "MSTRG.1662.1"; exon_number "1";
1	StringTie	exon	183867805	183868099	1000	+	.	gene_id "MSTRG.1662"; transcript_id "MSTRG.1662.1"; exon_number "2";
1	StringTie	transcript	183863470	183872147	1000	+	.	gene_id "MSTRG.1662"; transcript_id "MSTRG.1662.2";
1	StringTie	exon	183863470	183863629	1000	+	.	gene_id "MSTRG.1662"; transcript_id "MSTRG.1662.2"; exon_number "1";
1	StringTie	exon	183872064	183872147	1000	+	.	gene_id "MSTRG.1662"; transcript_id "MSTRG.1662.2"; exon_number "2";
1	StringTie	transcript	186477955	186529949	1000	-	.	gene_id "MSTRG.1692"; transcript_id "MSTRG.1692.2";
1	StringTie	exon	186477955	186478349	1000	-	.	gene_id "MSTRG.1692"; transcript_id "MSTRG.1692.2"; exon_number "1";
1	StringTie	exon	186524285	186524372	1000	-	.	gene_id "MSTRG.1692"; transcript_id "MSTRG.1692.2"; exon_number "2";
1	StringTie	exon	186529198	186529949	1000	-	.	gene_id "MSTRG.1692"; transcript_id "MSTRG.1692.2"; exon_number "3";
1	StringTie	transcript	189331484	189358015	1000	-	.	gene_id "MSTRG.1710"; transcript_id "MSTRG.1710.1";
1	StringTie	exon	189331484	189331568	1000	-	.	gene_id "MSTRG.1710"; transcript_id "MSTRG.1710.1"; exon_number "1";
1	StringTie	exon	189356804	189356842	1000	-	.	gene_id "MSTRG.1710"; transcript_id "MSTRG.1710.1"; exon_number "2";
1	StringTie	exon	189357898	189358015	1000	-	.	gene_id "MSTRG.1710"; transcript_id "MSTRG.1710.1"; exon_number "3";
1	StringTie	transcript	201323284	201333585	1000	+	.	gene_id "MSTRG.1867"; transcript_id "MSTRG.1867.3";
1	StringTie	exon	201323284	201323346	1000	+	.	gene_id "MSTRG.1867"; transcript_id "MSTRG.1867.3"; exon_number "1";
1	StringTie	exon	201332506	201333585	1000	+	.	gene_id "MSTRG.1867"; transcript_id "MSTRG.1867.3"; exon_number "2";
1	StringTie	transcript	201542306	201551756	1000	-	.	gene_id "MSTRG.1893"; transcript_id "MSTRG.1893.1";
1	StringTie	exon	201542306	201543894	1000	-	.	gene_id "MSTRG.1893"; transcript_id "MSTRG.1893.1"; exon_number "1";
1	StringTie	exon	201551727	201551756	1000	-	.	gene_id "MSTRG.1893"; transcript_id "MSTRG.1893.1"; exon_number "2";
1	StringTie	transcript	204383962	204413036	1000	+	.	gene_id "MSTRG.1903"; transcript_id "MSTRG.1903.1";
1	StringTie	exon	204383962	204384122	1000	+	.	gene_id "MSTRG.1903"; transcript_id "MSTRG.1903.1"; exon_number "1";
1	StringTie	exon	204412573	204413036	1000	+	.	gene_id "MSTRG.1903"; transcript_id "MSTRG.1903.1"; exon_number "2";
1	StringTie	transcript	209063615	209111297	1000	-	.	gene_id "MSTRG.1945"; transcript_id "MSTRG.1945.1";
1	StringTie	exon	209063615	209063768	1000	-	.	gene_id "MSTRG.1945"; transcript_id "MSTRG.1945.1"; exon_number "1";
1	StringTie	exon	209110948	209111297	1000	-	.	gene_id "MSTRG.1945"; transcript_id "MSTRG.1945.1"; exon_number "2";
1	StringTie	transcript	219300640	219334436	1000	+	.	gene_id "MSTRG.1991"; transcript_id "MSTRG.1991.1";
1	StringTie	exon	219300640	219300769	1000	+	.	gene_id "MSTRG.1991"; transcript_id "MSTRG.1991.1"; exon_number "1";
1	StringTie	exon	219318990	219319159	1000	+	.	gene_id "MSTRG.1991"; transcript_id "MSTRG.1991.1"; exon_number "2";
1	StringTie	exon	219334235	219334436	1000	+	.	gene_id "MSTRG.1991"; transcript_id "MSTRG.1991.1"; exon_number "3";
1	StringTie	transcript	219349100	219372875	1000	+	.	gene_id "MSTRG.1992"; transcript_id "MSTRG.1992.1";
1	StringTie	exon	219349100	219349315	1000	+	.	gene_id "MSTRG.1992"; transcript_id "MSTRG.1992.1"; exon_number "1";
1	StringTie	exon	219372848	219372875	1000	+	.	gene_id "MSTRG.1992"; transcript_id "MSTRG.1992.1"; exon_number "2";
1	StringTie	transcript	229871792	229955739	1000	-	.	gene_id "MSTRG.2083"; transcript_id "MSTRG.2083.1";
1	StringTie	exon	229871792	229873193	1000	-	.	gene_id "MSTRG.2083"; transcript_id "MSTRG.2083.1"; exon_number "1";
1	StringTie	exon	229928721	229928855	1000	-	.	gene_id "MSTRG.2083"; transcript_id "MSTRG.2083.1"; exon_number "2";
1	StringTie	exon	229952108	229952245	1000	-	.	gene_id "MSTRG.2083"; transcript_id "MSTRG.2083.1"; exon_number "3";
1	StringTie	exon	229955621	229955739	1000	-	.	gene_id "MSTRG.2083"; transcript_id "MSTRG.2083.1"; exon_number "4";
1	StringTie	transcript	229872232	229952581	1000	-	.	gene_id "MSTRG.2083"; transcript_id "MSTRG.2083.2";
1	StringTie	exon	229872232	229873193	1000	-	.	gene_id "MSTRG.2083"; transcript_id "MSTRG.2083.2"; exon_number "1";
1	StringTie	exon	229928721	229928855	1000	-	.	gene_id "MSTRG.2083"; transcript_id "MSTRG.2083.2"; exon_number "2";
1	StringTie	exon	229952108	229952245	1000	-	.	gene_id "MSTRG.2083"; transcript_id "MSTRG.2083.2"; exon_number "3";
1	StringTie	exon	229952527	229952581	1000	-	.	gene_id "MSTRG.2083"; transcript_id "MSTRG.2083.2"; exon_number "4";
1	StringTie	transcript	229872866	229955690	1000	-	.	gene_id "MSTRG.2083"; transcript_id "MSTRG.2083.3";
1	StringTie	exon	229872866	229873193	1000	-	.	gene_id "MSTRG.2083"; transcript_id "MSTRG.2083.3"; exon_number "1";
1	StringTie	exon	229952108	229952245	1000	-	.	gene_id "MSTRG.2083"; transcript_id "MSTRG.2083.3"; exon_number "2";
1	StringTie	exon	229955621	229955690	1000	-	.	gene_id "MSTRG.2083"; transcript_id "MSTRG.2083.3"; exon_number "3";
1	StringTie	transcript	236906339	236914738	1000	-	.	gene_id "MSTRG.2142"; transcript_id "MSTRG.2142.1";
1	StringTie	exon	236906339	236906358	1000	-	.	gene_id "MSTRG.2142"; transcript_id "MSTRG.2142.1"; exon_number "1";
1	StringTie	exon	236911742	236914738	1000	-	.	gene_id "MSTRG.2142"; transcript_id "MSTRG.2142.1"; exon_number "2";
1	StringTie	transcript	241077142	241087431	1000	+	.	gene_id "MSTRG.2196"; transcript_id "MSTRG.2196.1";
1	StringTie	exon	241077142	241077335	1000	+	.	gene_id "MSTRG.2196"; transcript_id "MSTRG.2196.1"; exon_number "1";
1	StringTie	exon	241083707	241085614	1000	+	.	gene_id "MSTRG.2196"; transcript_id "MSTRG.2196.1"; exon_number "2";
1	StringTie	exon	241086817	241087431	1000	+	.	gene_id "MSTRG.2196"; transcript_id "MSTRG.2196.1"; exon_number "3";
1	StringTie	transcript	241077144	241087421	1000	+	.	gene_id "MSTRG.2196"; transcript_id "MSTRG.2196.2";
1	StringTie	exon	241077144	241077335	1000	+	.	gene_id "MSTRG.2196"; transcript_id "MSTRG.2196.2"; exon_number "1";
1	StringTie	exon	241083707	241085614	1000	+	.	gene_id "MSTRG.2196"; transcript_id "MSTRG.2196.2"; exon_number "2";
1	StringTie	exon	241086790	241087421	1000	+	.	gene_id "MSTRG.2196"; transcript_id "MSTRG.2196.2"; exon_number "3";
1	StringTie	transcript	248408632	248419575	1000	-	.	gene_id "MSTRG.2256"; transcript_id "MSTRG.2256.1";
1	StringTie	exon	248408632	248409524	1000	-	.	gene_id "MSTRG.2256"; transcript_id "MSTRG.2256.1"; exon_number "1";
1	StringTie	exon	248419541	248419575	1000	-	.	gene_id "MSTRG.2256"; transcript_id "MSTRG.2256.1"; exon_number "2";
1	StringTie	transcript	254720568	254724912	1000	-	.	gene_id "MSTRG.2346"; transcript_id "MSTRG.2346.1";
1	StringTie	exon	254720568	254722862	1000	-	.	gene_id "MSTRG.2346"; transcript_id "MSTRG.2346.1"; exon_number "1";
1	StringTie	exon	254723511	254723708	1000	-	.	gene_id "MSTRG.2346"; transcript_id "MSTRG.2346.1"; exon_number "2";
1	StringTie	exon	254723863	254724009	1000	-	.	gene_id "MSTRG.2346"; transcript_id "MSTRG.2346.1"; exon_number "3";
1	StringTie	exon	254724772	254724912	1000	-	.	gene_id "MSTRG.2346"; transcript_id "MSTRG.2346.1"; exon_number "4";
1	StringTie	transcript	264223295	264237778	1000	+	.	gene_id "MSTRG.2427"; transcript_id "MSTRG.2427.1";
1	StringTie	exon	264223295	264223643	1000	+	.	gene_id "MSTRG.2427"; transcript_id "MSTRG.2427.1"; exon_number "1";
1	StringTie	exon	264228418	264228767	1000	+	.	gene_id "MSTRG.2427"; transcript_id "MSTRG.2427.1"; exon_number "2";
1	StringTie	exon	264230952	264231139	1000	+	.	gene_id "MSTRG.2427"; transcript_id "MSTRG.2427.1"; exon_number "3";
1	StringTie	exon	264237266	264237778	1000	+	.	gene_id "MSTRG.2427"; transcript_id "MSTRG.2427.1"; exon_number "4";
1	StringTie	transcript	264223295	264237753	1000	+	.	gene_id "MSTRG.2427"; transcript_id "MSTRG.2427.2";
1	StringTie	exon	264223295	264223643	1000	+	.	gene_id "MSTRG.2427"; transcript_id "MSTRG.2427.2"; exon_number "1";
1	StringTie	exon	264228418	264228767	1000	+	.	gene_id "MSTRG.2427"; transcript_id "MSTRG.2427.2"; exon_number "2";
1	StringTie	exon	264237266	264237753	1000	+	.	gene_id "MSTRG.2427"; transcript_id "MSTRG.2427.2"; exon_number "3";
1	StringTie	transcript	267187518	267188319	1000	-	.	gene_id "MSTRG.2459"; transcript_id "MSTRG.2459.1";
1	StringTie	exon	267187518	267187794	1000	-	.	gene_id "MSTRG.2459"; transcript_id "MSTRG.2459.1"; exon_number "1";
1	StringTie	exon	267188031	267188319	1000	-	.	gene_id "MSTRG.2459"; transcript_id "MSTRG.2459.1"; exon_number "2";
1	StringTie	transcript	268650226	268650748	1000	-	.	gene_id "MSTRG.2542"; transcript_id "MSTRG.2542.3";
1	StringTie	exon	268650226	268650572	1000	-	.	gene_id "MSTRG.2542"; transcript_id "MSTRG.2542.3"; exon_number "1";
1	StringTie	exon	268650648	268650748	1000	-	.	gene_id "MSTRG.2542"; transcript_id "MSTRG.2542.3"; exon_number "2";
1	StringTie	transcript	269445944	269450514	1000	-	.	gene_id "MSTRG.2565"; transcript_id "MSTRG.2565.1";
1	StringTie	exon	269445944	269446054	1000	-	.	gene_id "MSTRG.2565"; transcript_id "MSTRG.2565.1"; exon_number "1";
1	StringTie	exon	269449500	269450514	1000	-	.	gene_id "MSTRG.2565"; transcript_id "MSTRG.2565.1"; exon_number "2";
1	StringTie	transcript	269640847	269642704	1000	-	.	gene_id "MSTRG.2571"; transcript_id "MSTRG.2571.1";
1	StringTie	exon	269640847	269641218	1000	-	.	gene_id "MSTRG.2571"; transcript_id "MSTRG.2571.1"; exon_number "1";
1	StringTie	exon	269641738	269642704	1000	-	.	gene_id "MSTRG.2571"; transcript_id "MSTRG.2571.1"; exon_number "2";
1	StringTie	transcript	269706888	269708362	1000	-	.	gene_id "MSTRG.2572"; transcript_id "MSTRG.2572.1";
1	StringTie	exon	269706888	269706969	1000	-	.	gene_id "MSTRG.2572"; transcript_id "MSTRG.2572.1"; exon_number "1";
1	StringTie	exon	269708109	269708362	1000	-	.	gene_id "MSTRG.2572"; transcript_id "MSTRG.2572.1"; exon_number "2";
1	StringTie	transcript	269684838	269686080	1000	-	.	gene_id "MSTRG.2573"; transcript_id "MSTRG.2573.1";
1	StringTie	exon	269684838	269685288	1000	-	.	gene_id "MSTRG.2573"; transcript_id "MSTRG.2573.1"; exon_number "1";
1	StringTie	exon	269686004	269686080	1000	-	.	gene_id "MSTRG.2573"; transcript_id "MSTRG.2573.1"; exon_number "2";
1	StringTie	transcript	269685267	269686989	1000	-	.	gene_id "MSTRG.2573"; transcript_id "MSTRG.2573.2";
1	StringTie	exon	269685267	269685288	1000	-	.	gene_id "MSTRG.2573"; transcript_id "MSTRG.2573.2"; exon_number "1";
1	StringTie	exon	269686635	269686989	1000	-	.	gene_id "MSTRG.2573"; transcript_id "MSTRG.2573.2"; exon_number "2";
1	StringTie	transcript	269575601	269586565	1000	+	.	gene_id "MSTRG.2574"; transcript_id "MSTRG.2574.1";
1	StringTie	exon	269575601	269575624	1000	+	.	gene_id "MSTRG.2574"; transcript_id "MSTRG.2574.1"; exon_number "1";
1	StringTie	exon	269583521	269583665	1000	+	.	gene_id "MSTRG.2574"; transcript_id "MSTRG.2574.1"; exon_number "2";
1	StringTie	exon	269586036	269586565	1000	+	.	gene_id "MSTRG.2574"; transcript_id "MSTRG.2574.1"; exon_number "3";
1	StringTie	transcript	269578520	269586379	1000	+	.	gene_id "MSTRG.2574"; transcript_id "MSTRG.2574.2";
1	StringTie	exon	269578520	269578611	1000	+	.	gene_id "MSTRG.2574"; transcript_id "MSTRG.2574.2"; exon_number "1";
1	StringTie	exon	269583521	269583665	1000	+	.	gene_id "MSTRG.2574"; transcript_id "MSTRG.2574.2"; exon_number "2";
1	StringTie	exon	269586036	269586379	1000	+	.	gene_id "MSTRG.2574"; transcript_id "MSTRG.2574.2"; exon_number "3";
1	StringTie	transcript	269580328	269586382	1000	+	.	gene_id "MSTRG.2574"; transcript_id "MSTRG.2574.3";
1	StringTie	exon	269580328	269580403	1000	+	.	gene_id "MSTRG.2574"; transcript_id "MSTRG.2574.3"; exon_number "1";
1	StringTie	exon	269583521	269583665	1000	+	.	gene_id "MSTRG.2574"; transcript_id "MSTRG.2574.3"; exon_number "2";
1	StringTie	exon	269586036	269586382	1000	+	.	gene_id "MSTRG.2574"; transcript_id "MSTRG.2574.3"; exon_number "3";
1	StringTie	transcript	269580330	269586420	1000	+	.	gene_id "MSTRG.2574"; transcript_id "MSTRG.2574.4";
1	StringTie	exon	269580330	269580452	1000	+	.	gene_id "MSTRG.2574"; transcript_id "MSTRG.2574.4"; exon_number "1";
1	StringTie	exon	269583521	269583665	1000	+	.	gene_id "MSTRG.2574"; transcript_id "MSTRG.2574.4"; exon_number "2";
1	StringTie	exon	269586036	269586420	1000	+	.	gene_id "MSTRG.2574"; transcript_id "MSTRG.2574.4"; exon_number "3";
1	StringTie	transcript	269581899	269586336	1000	+	.	gene_id "MSTRG.2574"; transcript_id "MSTRG.2574.5";
1	StringTie	exon	269581899	269582676	1000	+	.	gene_id "MSTRG.2574"; transcript_id "MSTRG.2574.5"; exon_number "1";
1	StringTie	exon	269583521	269583665	1000	+	.	gene_id "MSTRG.2574"; transcript_id "MSTRG.2574.5"; exon_number "2";
1	StringTie	exon	269586036	269586336	1000	+	.	gene_id "MSTRG.2574"; transcript_id "MSTRG.2574.5"; exon_number "3";
1	StringTie	transcript	269581903	269607367	1000	+	.	gene_id "MSTRG.2574"; transcript_id "MSTRG.2574.6";
1	StringTie	exon	269581903	269582676	1000	+	.	gene_id "MSTRG.2574"; transcript_id "MSTRG.2574.6"; exon_number "1";
1	StringTie	exon	269583521	269583665	1000	+	.	gene_id "MSTRG.2574"; transcript_id "MSTRG.2574.6"; exon_number "2";
1	StringTie	exon	269605287	269607367	1000	+	.	gene_id "MSTRG.2574"; transcript_id "MSTRG.2574.6"; exon_number "3";
1	StringTie	transcript	270180302	270182630	1000	+	.	gene_id "MSTRG.2600"; transcript_id "MSTRG.2600.1";
1	StringTie	exon	270180302	270181074	1000	+	.	gene_id "MSTRG.2600"; transcript_id "MSTRG.2600.1"; exon_number "1";
1	StringTie	exon	270182034	270182630	1000	+	.	gene_id "MSTRG.2600"; transcript_id "MSTRG.2600.1"; exon_number "2";
1	StringTie	transcript	271237598	271237986	1000	+	.	gene_id "MSTRG.2617"; transcript_id "MSTRG.2617.1";
1	StringTie	exon	271237598	271237795	1000	+	.	gene_id "MSTRG.2617"; transcript_id "MSTRG.2617.1"; exon_number "1";
1	StringTie	exon	271237880	271237986	1000	+	.	gene_id "MSTRG.2617"; transcript_id "MSTRG.2617.1"; exon_number "2";
1	StringTie	transcript	271261663	271262051	1000	-	.	gene_id "MSTRG.2618"; transcript_id "MSTRG.2618.2";
1	StringTie	exon	271261663	271261787	1000	-	.	gene_id "MSTRG.2618"; transcript_id "MSTRG.2618.2"; exon_number "1";
1	StringTie	exon	271261875	271262051	1000	-	.	gene_id "MSTRG.2618"; transcript_id "MSTRG.2618.2"; exon_number "2";
1	StringTie	transcript	273552687	273555665	1000	-	.	gene_id "MSTRG.2687"; transcript_id "MSTRG.2687.3";
1	StringTie	exon	273552687	273554036	1000	-	.	gene_id "MSTRG.2687"; transcript_id "MSTRG.2687.3"; exon_number "1";
1	StringTie	exon	273554681	273555665	1000	-	.	gene_id "MSTRG.2687"; transcript_id "MSTRG.2687.3"; exon_number "2";
1	StringTie	transcript	274277054	274280745	1000	+	.	gene_id "MSTRG.2703"; transcript_id "MSTRG.2703.1";
1	StringTie	exon	274277054	274277131	1000	+	.	gene_id "MSTRG.2703"; transcript_id "MSTRG.2703.1"; exon_number "1";
1	StringTie	exon	274279805	274280745	1000	+	.	gene_id "MSTRG.2703"; transcript_id "MSTRG.2703.1"; exon_number "2";
1	StringTie	transcript	274277054	274280745	1000	+	.	gene_id "MSTRG.2703"; transcript_id "MSTRG.2703.2";
1	StringTie	exon	274277054	274277131	1000	+	.	gene_id "MSTRG.2703"; transcript_id "MSTRG.2703.2"; exon_number "1";
1	StringTie	exon	274279808	274280745	1000	+	.	gene_id "MSTRG.2703"; transcript_id "MSTRG.2703.2"; exon_number "2";
2	StringTie	transcript	1365676	1367832	1000	-	.	gene_id "MSTRG.13175"; transcript_id "MSTRG.13175.2";
2	StringTie	exon	1365676	1365944	1000	-	.	gene_id "MSTRG.13175"; transcript_id "MSTRG.13175.2"; exon_number "1";
2	StringTie	exon	1366307	1367832	1000	-	.	gene_id "MSTRG.13175"; transcript_id "MSTRG.13175.2"; exon_number "2";
2	StringTie	transcript	2480963	2484135	1000	+	.	gene_id "MSTRG.13220"; transcript_id "MSTRG.13220.1";
2	StringTie	exon	2480963	2481002	1000	+	.	gene_id "MSTRG.13220"; transcript_id "MSTRG.13220.1"; exon_number "1";
2	StringTie	exon	2482495	2482648	1000	+	.	gene_id "MSTRG.13220"; transcript_id "MSTRG.13220.1"; exon_number "2";
2	StringTie	exon	2483732	2484135	1000	+	.	gene_id "MSTRG.13220"; transcript_id "MSTRG.13220.1"; exon_number "3";
2	StringTie	transcript	3898953	3899408	1000	-	.	gene_id "MSTRG.13225"; transcript_id "MSTRG.13225.1";
2	StringTie	exon	3898953	3899284	1000	-	.	gene_id "MSTRG.13225"; transcript_id "MSTRG.13225.1"; exon_number "1";
2	StringTie	exon	3899374	3899408	1000	-	.	gene_id "MSTRG.13225"; transcript_id "MSTRG.13225.1"; exon_number "2";
2	StringTie	transcript	4120290	4123579	1000	-	.	gene_id "MSTRG.13229"; transcript_id "MSTRG.13229.1";
2	StringTie	exon	4120290	4120992	1000	-	.	gene_id "MSTRG.13229"; transcript_id "MSTRG.13229.1"; exon_number "1";
2	StringTie	exon	4121623	4121720	1000	-	.	gene_id "MSTRG.13229"; transcript_id "MSTRG.13229.1"; exon_number "2";
2	StringTie	exon	4123321	4123579	1000	-	.	gene_id "MSTRG.13229"; transcript_id "MSTRG.13229.1"; exon_number "3";
2	StringTie	transcript	4120642	4123483	1000	-	.	gene_id "MSTRG.13229"; transcript_id "MSTRG.13229.2";
2	StringTie	exon	4120642	4121298	1000	-	.	gene_id "MSTRG.13229"; transcript_id "MSTRG.13229.2"; exon_number "1";
2	StringTie	exon	4121623	4121720	1000	-	.	gene_id "MSTRG.13229"; transcript_id "MSTRG.13229.2"; exon_number "2";
2	StringTie	exon	4123321	4123483	1000	-	.	gene_id "MSTRG.13229"; transcript_id "MSTRG.13229.2"; exon_number "3";
2	StringTie	transcript	4120691	4123480	1000	-	.	gene_id "MSTRG.13229"; transcript_id "MSTRG.13229.3";
2	StringTie	exon	4120691	4121064	1000	-	.	gene_id "MSTRG.13229"; transcript_id "MSTRG.13229.3"; exon_number "1";
2	StringTie	exon	4121623	4121720	1000	-	.	gene_id "MSTRG.13229"; transcript_id "MSTRG.13229.3"; exon_number "2";
2	StringTie	exon	4123321	4123480	1000	-	.	gene_id "MSTRG.13229"; transcript_id "MSTRG.13229.3"; exon_number "3";
2	StringTie	transcript	4703886	4705723	1000	-	.	gene_id "MSTRG.13255"; transcript_id "MSTRG.13255.1";
2	StringTie	exon	4703886	4704379	1000	-	.	gene_id "MSTRG.13255"; transcript_id "MSTRG.13255.1"; exon_number "1";
2	StringTie	exon	4705622	4705723	1000	-	.	gene_id "MSTRG.13255"; transcript_id "MSTRG.13255.1"; exon_number "2";
2	StringTie	transcript	5480835	5488881	1000	+	.	gene_id "MSTRG.13309"; transcript_id "MSTRG.13309.2";
2	StringTie	exon	5480835	5481011	1000	+	.	gene_id "MSTRG.13309"; transcript_id "MSTRG.13309.2"; exon_number "1";
2	StringTie	exon	5485612	5485649	1000	+	.	gene_id "MSTRG.13309"; transcript_id "MSTRG.13309.2"; exon_number "2";
2	StringTie	exon	5487207	5488881	1000	+	.	gene_id "MSTRG.13309"; transcript_id "MSTRG.13309.2"; exon_number "3";
2	StringTie	transcript	5480835	5488876	1000	+	.	gene_id "MSTRG.13309"; transcript_id "MSTRG.13309.3";
2	StringTie	exon	5480835	5481011	1000	+	.	gene_id "MSTRG.13309"; transcript_id "MSTRG.13309.3"; exon_number "1";
2	StringTie	exon	5485612	5485649	1000	+	.	gene_id "MSTRG.13309"; transcript_id "MSTRG.13309.3"; exon_number "2";
2	StringTie	exon	5486391	5486618	1000	+	.	gene_id "MSTRG.13309"; transcript_id "MSTRG.13309.3"; exon_number "3";
2	StringTie	exon	5487207	5488876	1000	+	.	gene_id "MSTRG.13309"; transcript_id "MSTRG.13309.3"; exon_number "4";
2	StringTie	transcript	6508464	6509334	1000	+	.	gene_id "MSTRG.13365"; transcript_id "MSTRG.13365.6";
2	StringTie	exon	6508464	6508616	1000	+	.	gene_id "MSTRG.13365"; transcript_id "MSTRG.13365.6"; exon_number "1";
2	StringTie	exon	6508933	6509334	1000	+	.	gene_id "MSTRG.13365"; transcript_id "MSTRG.13365.6"; exon_number "2";
2	StringTie	transcript	9319733	9324945	1000	+	.	gene_id "MSTRG.13489"; transcript_id "MSTRG.13489.1";
2	StringTie	exon	9319733	9319814	1000	+	.	gene_id "MSTRG.13489"; transcript_id "MSTRG.13489.1"; exon_number "1";
2	StringTie	exon	9322964	9323105	1000	+	.	gene_id "MSTRG.13489"; transcript_id "MSTRG.13489.1"; exon_number "2";
2	StringTie	exon	9323621	9324945	1000	+	.	gene_id "MSTRG.13489"; transcript_id "MSTRG.13489.1"; exon_number "3";
2	StringTie	transcript	9322277	9324562	1000	+	.	gene_id "MSTRG.13489"; transcript_id "MSTRG.13489.2";
2	StringTie	exon	9322277	9322539	1000	+	.	gene_id "MSTRG.13489"; transcript_id "MSTRG.13489.2"; exon_number "1";
2	StringTie	exon	9322964	9323105	1000	+	.	gene_id "MSTRG.13489"; transcript_id "MSTRG.13489.2"; exon_number "2";
2	StringTie	exon	9323621	9324562	1000	+	.	gene_id "MSTRG.13489"; transcript_id "MSTRG.13489.2"; exon_number "3";
2	StringTie	transcript	11923709	11926166	1000	+	.	gene_id "MSTRG.13563"; transcript_id "MSTRG.13563.1";
2	StringTie	exon	11923709	11924006	1000	+	.	gene_id "MSTRG.13563"; transcript_id "MSTRG.13563.1"; exon_number "1";
2	StringTie	exon	11924115	11926166	1000	+	.	gene_id "MSTRG.13563"; transcript_id "MSTRG.13563.1"; exon_number "2";
2	StringTie	transcript	11923768	11925075	1000	+	.	gene_id "MSTRG.13563"; transcript_id "MSTRG.13563.2";
2	StringTie	exon	11923768	11924006	1000	+	.	gene_id "MSTRG.13563"; transcript_id "MSTRG.13563.2"; exon_number "1";
2	StringTie	exon	11924093	11925075	1000	+	.	gene_id "MSTRG.13563"; transcript_id "MSTRG.13563.2"; exon_number "2";
2	StringTie	transcript	12279503	12286761	1000	+	.	gene_id "MSTRG.13570"; transcript_id "MSTRG.13570.1";
2	StringTie	exon	12279503	12280206	1000	+	.	gene_id "MSTRG.13570"; transcript_id "MSTRG.13570.1"; exon_number "1";
2	StringTie	exon	12285713	12286761	1000	+	.	gene_id "MSTRG.13570"; transcript_id "MSTRG.13570.1"; exon_number "2";
2	StringTie	transcript	12279582	12286748	1000	+	.	gene_id "MSTRG.13570"; transcript_id "MSTRG.13570.2";
2	StringTie	exon	12279582	12280206	1000	+	.	gene_id "MSTRG.13570"; transcript_id "MSTRG.13570.2"; exon_number "1";
2	StringTie	exon	12281990	12282152	1000	+	.	gene_id "MSTRG.13570"; transcript_id "MSTRG.13570.2"; exon_number "2";
2	StringTie	exon	12285713	12286748	1000	+	.	gene_id "MSTRG.13570"; transcript_id "MSTRG.13570.2"; exon_number "3";
2	StringTie	transcript	12281752	12286751	1000	+	.	gene_id "MSTRG.13570"; transcript_id "MSTRG.13570.3";
2	StringTie	exon	12281752	12282042	1000	+	.	gene_id "MSTRG.13570"; transcript_id "MSTRG.13570.3"; exon_number "1";
2	StringTie	exon	12285713	12286751	1000	+	.	gene_id "MSTRG.13570"; transcript_id "MSTRG.13570.3"; exon_number "2";
2	StringTie	transcript	25265665	25271654	1000	-	.	gene_id "MSTRG.13700"; transcript_id "MSTRG.13700.3";
2	StringTie	exon	25265665	25267754	1000	-	.	gene_id "MSTRG.13700"; transcript_id "MSTRG.13700.3"; exon_number "1";
2	StringTie	exon	25271067	25271654	1000	-	.	gene_id "MSTRG.13700"; transcript_id "MSTRG.13700.3"; exon_number "2";
2	StringTie	transcript	25265989	25271579	1000	-	.	gene_id "MSTRG.13700"; transcript_id "MSTRG.13700.4";
2	StringTie	exon	25265989	25268869	1000	-	.	gene_id "MSTRG.13700"; transcript_id "MSTRG.13700.4"; exon_number "1";
2	StringTie	exon	25271067	25271579	1000	-	.	gene_id "MSTRG.13700"; transcript_id "MSTRG.13700.4"; exon_number "2";
2	StringTie	transcript	33331213	33333320	1000	+	.	gene_id "MSTRG.13770"; transcript_id "MSTRG.13770.1";
2	StringTie	exon	33331213	33331855	1000	+	.	gene_id "MSTRG.13770"; transcript_id "MSTRG.13770.1"; exon_number "1";
2	StringTie	exon	33333018	33333320	1000	+	.	gene_id "MSTRG.13770"; transcript_id "MSTRG.13770.1"; exon_number "2";
2	StringTie	transcript	46746520	46770247	1000	+	.	gene_id "MSTRG.13874"; transcript_id "MSTRG.13874.2";
2	StringTie	exon	46746520	46746591	1000	+	.	gene_id "MSTRG.13874"; transcript_id "MSTRG.13874.2"; exon_number "1";
2	StringTie	exon	46767468	46767571	1000	+	.	gene_id "MSTRG.13874"; transcript_id "MSTRG.13874.2"; exon_number "2";
2	StringTie	exon	46769546	46770247	1000	+	.	gene_id "MSTRG.13874"; transcript_id "MSTRG.13874.2"; exon_number "3";
2	StringTie	transcript	46767343	46770321	1000	+	.	gene_id "MSTRG.13874"; transcript_id "MSTRG.13874.3";
2	StringTie	exon	46767343	46767390	1000	+	.	gene_id "MSTRG.13874"; transcript_id "MSTRG.13874.3"; exon_number "1";
2	StringTie	exon	46767471	46767571	1000	+	.	gene_id "MSTRG.13874"; transcript_id "MSTRG.13874.3"; exon_number "2";
2	StringTie	exon	46769546	46770321	1000	+	.	gene_id "MSTRG.13874"; transcript_id "MSTRG.13874.3"; exon_number "3";
2	StringTie	transcript	57748731	57814506	1000	+	.	gene_id "MSTRG.13965"; transcript_id "MSTRG.13965.1";
2	StringTie	exon	57748731	57748860	1000	+	.	gene_id "MSTRG.13965"; transcript_id "MSTRG.13965.1"; exon_number "1";
2	StringTie	exon	57761462	57761590	1000	+	.	gene_id "MSTRG.13965"; transcript_id "MSTRG.13965.1"; exon_number "2";
2	StringTie	exon	57814458	57814506	1000	+	.	gene_id "MSTRG.13965"; transcript_id "MSTRG.13965.1"; exon_number "3";
2	StringTie	transcript	59744438	59771099	1000	+	.	gene_id "MSTRG.14038"; transcript_id "MSTRG.14038.1";
2	StringTie	exon	59744438	59744680	1000	+	.	gene_id "MSTRG.14038"; transcript_id "MSTRG.14038.1"; exon_number "1";
2	StringTie	exon	59751526	59751594	1000	+	.	gene_id "MSTRG.14038"; transcript_id "MSTRG.14038.1"; exon_number "2";
2	StringTie	exon	59754907	59755018	1000	+	.	gene_id "MSTRG.14038"; transcript_id "MSTRG.14038.1"; exon_number "3";
2	StringTie	exon	59769965	59771099	1000	+	.	gene_id "MSTRG.14038"; transcript_id "MSTRG.14038.1"; exon_number "4";
2	StringTie	transcript	59744455	59771099	1000	+	.	gene_id "MSTRG.14038"; transcript_id "MSTRG.14038.2";
2	StringTie	exon	59744455	59744680	1000	+	.	gene_id "MSTRG.14038"; transcript_id "MSTRG.14038.2"; exon_number "1";
2	StringTie	exon	59751526	59751594	1000	+	.	gene_id "MSTRG.14038"; transcript_id "MSTRG.14038.2"; exon_number "2";
2	StringTie	exon	59769965	59771099	1000	+	.	gene_id "MSTRG.14038"; transcript_id "MSTRG.14038.2"; exon_number "3";
2	StringTie	transcript	65168218	65173268	1000	-	.	gene_id "MSTRG.14153"; transcript_id "MSTRG.14153.1";
2	StringTie	exon	65168218	65168850	1000	-	.	gene_id "MSTRG.14153"; transcript_id "MSTRG.14153.1"; exon_number "1";
2	StringTie	exon	65172923	65173068	1000	-	.	gene_id "MSTRG.14153"; transcript_id "MSTRG.14153.1"; exon_number "2";
2	StringTie	exon	65173219	65173268	1000	-	.	gene_id "MSTRG.14153"; transcript_id "MSTRG.14153.1"; exon_number "3";
2	StringTie	transcript	65168526	65173235	1000	-	.	gene_id "MSTRG.14153"; transcript_id "MSTRG.14153.2";
2	StringTie	exon	65168526	65168850	1000	-	.	gene_id "MSTRG.14153"; transcript_id "MSTRG.14153.2"; exon_number "1";
2	StringTie	exon	65172923	65173068	1000	-	.	gene_id "MSTRG.14153"; transcript_id "MSTRG.14153.2"; exon_number "2";
2	StringTie	exon	65173170	65173235	1000	-	.	gene_id "MSTRG.14153"; transcript_id "MSTRG.14153.2"; exon_number "3";
2	StringTie	transcript	70502003	70528177	1000	-	.	gene_id "MSTRG.14310"; transcript_id "MSTRG.14310.1";
2	StringTie	exon	70502003	70502044	1000	-	.	gene_id "MSTRG.14310"; transcript_id "MSTRG.14310.1"; exon_number "1";
2	StringTie	exon	70528014	70528177	1000	-	.	gene_id "MSTRG.14310"; transcript_id "MSTRG.14310.1"; exon_number "2";
2	StringTie	transcript	71294968	71295425	1000	+	.	gene_id "MSTRG.14353"; transcript_id "MSTRG.14353.1";
2	StringTie	exon	71294968	71295091	1000	+	.	gene_id "MSTRG.14353"; transcript_id "MSTRG.14353.1"; exon_number "1";
2	StringTie	exon	71295271	71295425	1000	+	.	gene_id "MSTRG.14353"; transcript_id "MSTRG.14353.1"; exon_number "2";
2	StringTie	transcript	77563396	77567400	1000	+	.	gene_id "MSTRG.14597"; transcript_id "MSTRG.14597.1";
2	StringTie	exon	77563396	77563421	1000	+	.	gene_id "MSTRG.14597"; transcript_id "MSTRG.14597.1"; exon_number "1";
2	StringTie	exon	77567059	77567400	1000	+	.	gene_id "MSTRG.14597"; transcript_id "MSTRG.14597.1"; exon_number "2";
2	StringTie	transcript	77563438	77567592	1000	+	.	gene_id "MSTRG.14597"; transcript_id "MSTRG.14597.2";
2	StringTie	exon	77563438	77563524	1000	+	.	gene_id "MSTRG.14597"; transcript_id "MSTRG.14597.2"; exon_number "1";
2	StringTie	exon	77567062	77567592	1000	+	.	gene_id "MSTRG.14597"; transcript_id "MSTRG.14597.2"; exon_number "2";
2	StringTie	transcript	78237381	78258746	1000	-	.	gene_id "MSTRG.14618"; transcript_id "MSTRG.14618.1";
2	StringTie	exon	78237381	78238157	1000	-	.	gene_id "MSTRG.14618"; transcript_id "MSTRG.14618.1"; exon_number "1";
2	StringTie	exon	78258668	78258746	1000	-	.	gene_id "MSTRG.14618"; transcript_id "MSTRG.14618.1"; exon_number "2";
2	StringTie	transcript	79654361	79670304	1000	-	.	gene_id "MSTRG.14646"; transcript_id "MSTRG.14646.1";
2	StringTie	exon	79654361	79654519	1000	-	.	gene_id "MSTRG.14646"; transcript_id "MSTRG.14646.1"; exon_number "1";
2	StringTie	exon	79656145	79656195	1000	-	.	gene_id "MSTRG.14646"; transcript_id "MSTRG.14646.1"; exon_number "2";
2	StringTie	exon	79668664	79668796	1000	-	.	gene_id "MSTRG.14646"; transcript_id "MSTRG.14646.1"; exon_number "3";
2	StringTie	exon	79670185	79670304	1000	-	.	gene_id "MSTRG.14646"; transcript_id "MSTRG.14646.1"; exon_number "4";
2	StringTie	transcript	81620963	81640100	1000	+	.	gene_id "MSTRG.14722"; transcript_id "MSTRG.14722.4";
2	StringTie	exon	81620963	81620993	1000	+	.	gene_id "MSTRG.14722"; transcript_id "MSTRG.14722.4"; exon_number "1";
2	StringTie	exon	81639509	81640100	1000	+	.	gene_id "MSTRG.14722"; transcript_id "MSTRG.14722.4"; exon_number "2";
2	StringTie	transcript	86007631	86008662	1000	+	.	gene_id "MSTRG.14764"; transcript_id "MSTRG.14764.1";
2	StringTie	exon	86007631	86007911	1000	+	.	gene_id "MSTRG.14764"; transcript_id "MSTRG.14764.1"; exon_number "1";
2	StringTie	exon	86008459	86008662	1000	+	.	gene_id "MSTRG.14764"; transcript_id "MSTRG.14764.1"; exon_number "2";
2	StringTie	transcript	90298882	90307723	1000	+	.	gene_id "MSTRG.14817"; transcript_id "MSTRG.14817.1";
2	StringTie	exon	90298882	90299008	1000	+	.	gene_id "MSTRG.14817"; transcript_id "MSTRG.14817.1"; exon_number "1";
2	StringTie	exon	90300150	90300229	1000	+	.	gene_id "MSTRG.14817"; transcript_id "MSTRG.14817.1"; exon_number "2";
2	StringTie	exon	90307474	90307723	1000	+	.	gene_id "MSTRG.14817"; transcript_id "MSTRG.14817.1"; exon_number "3";
2	StringTie	transcript	91007364	91076650	1000	+	.	gene_id "MSTRG.14824"; transcript_id "MSTRG.14824.1";
2	StringTie	exon	91007364	91007400	1000	+	.	gene_id "MSTRG.14824"; transcript_id "MSTRG.14824.1"; exon_number "1";
2	StringTie	exon	91076332	91076405	1000	+	.	gene_id "MSTRG.14824"; transcript_id "MSTRG.14824.1"; exon_number "2";
2	StringTie	exon	91076501	91076650	1000	+	.	gene_id "MSTRG.14824"; transcript_id "MSTRG.14824.1"; exon_number "3";
2	StringTie	transcript	91194340	91199543	1000	-	.	gene_id "MSTRG.14831"; transcript_id "MSTRG.14831.1";
2	StringTie	exon	91194340	91195125	1000	-	.	gene_id "MSTRG.14831"; transcript_id "MSTRG.14831.1"; exon_number "1";
2	StringTie	exon	91199230	91199543	1000	-	.	gene_id "MSTRG.14831"; transcript_id "MSTRG.14831.1"; exon_number "2";
2	StringTie	transcript	98331621	98340932	1000	-	.	gene_id "MSTRG.14867"; transcript_id "MSTRG.14867.1";
2	StringTie	exon	98331621	98331878	1000	-	.	gene_id "MSTRG.14867"; transcript_id "MSTRG.14867.1"; exon_number "1";
2	StringTie	exon	98338313	98338397	1000	-	.	gene_id "MSTRG.14867"; transcript_id "MSTRG.14867.1"; exon_number "2";
2	StringTie	exon	98340841	98340932	1000	-	.	gene_id "MSTRG.14867"; transcript_id "MSTRG.14867.1"; exon_number "3";
2	StringTie	transcript	103415766	103424647	1000	+	.	gene_id "MSTRG.14909"; transcript_id "MSTRG.14909.1";
2	StringTie	exon	103415766	103415959	1000	+	.	gene_id "MSTRG.14909"; transcript_id "MSTRG.14909.1"; exon_number "1";
2	StringTie	exon	103416242	103416304	1000	+	.	gene_id "MSTRG.14909"; transcript_id "MSTRG.14909.1"; exon_number "2";
2	StringTie	exon	103424168	103424647	1000	+	.	gene_id "MSTRG.14909"; transcript_id "MSTRG.14909.1"; exon_number "3";
2	StringTie	transcript	103416142	103416865	1000	+	.	gene_id "MSTRG.14909"; transcript_id "MSTRG.14909.2";
2	StringTie	exon	103416142	103416304	1000	+	.	gene_id "MSTRG.14909"; transcript_id "MSTRG.14909.2"; exon_number "1";
2	StringTie	exon	103416458	103416865	1000	+	.	gene_id "MSTRG.14909"; transcript_id "MSTRG.14909.2"; exon_number "2";
2	StringTie	transcript	119500132	119504325	1000	-	.	gene_id "MSTRG.14984"; transcript_id "MSTRG.14984.1";
2	StringTie	exon	119500132	119500269	1000	-	.	gene_id "MSTRG.14984"; transcript_id "MSTRG.14984.1"; exon_number "1";
2	StringTie	exon	119504235	119504325	1000	-	.	gene_id "MSTRG.14984"; transcript_id "MSTRG.14984.1"; exon_number "2";
2	StringTie	transcript	117115826	117118357	1000	+	.	gene_id "MSTRG.15005"; transcript_id "MSTRG.15005.1";
2	StringTie	exon	117115826	117115965	1000	+	.	gene_id "MSTRG.15005"; transcript_id "MSTRG.15005.1"; exon_number "1";
2	StringTie	exon	117118219	117118357	1000	+	.	gene_id "MSTRG.15005"; transcript_id "MSTRG.15005.1"; exon_number "2";
2	StringTie	transcript	126550998	126551371	1000	+	.	gene_id "MSTRG.15063"; transcript_id "MSTRG.15063.1";
2	StringTie	exon	126550998	126551017	1000	+	.	gene_id "MSTRG.15063"; transcript_id "MSTRG.15063.1"; exon_number "1";
2	StringTie	exon	126551125	126551371	1000	+	.	gene_id "MSTRG.15063"; transcript_id "MSTRG.15063.1"; exon_number "2";
2	StringTie	transcript	128866664	128870893	1000	+	.	gene_id "MSTRG.15074"; transcript_id "MSTRG.15074.1";
2	StringTie	exon	128866664	128866982	1000	+	.	gene_id "MSTRG.15074"; transcript_id "MSTRG.15074.1"; exon_number "1";
2	StringTie	exon	128868056	128868180	1000	+	.	gene_id "MSTRG.15074"; transcript_id "MSTRG.15074.1"; exon_number "2";
2	StringTie	exon	128869331	128869457	1000	+	.	gene_id "MSTRG.15074"; transcript_id "MSTRG.15074.1"; exon_number "3";
2	StringTie	exon	128870490	128870645	1000	+	.	gene_id "MSTRG.15074"; transcript_id "MSTRG.15074.1"; exon_number "4";
2	StringTie	exon	128870731	128870893	1000	+	.	gene_id "MSTRG.15074"; transcript_id "MSTRG.15074.1"; exon_number "5";
2	StringTie	transcript	128866680	128870880	1000	+	.	gene_id "MSTRG.15074"; transcript_id "MSTRG.15074.2";
2	StringTie	exon	128866680	128866982	1000	+	.	gene_id "MSTRG.15074"; transcript_id "MSTRG.15074.2"; exon_number "1";
2	StringTie	exon	128868056	128869844	1000	+	.	gene_id "MSTRG.15074"; transcript_id "MSTRG.15074.2"; exon_number "2";
2	StringTie	exon	128870490	128870645	1000	+	.	gene_id "MSTRG.15074"; transcript_id "MSTRG.15074.2"; exon_number "3";
2	StringTie	exon	128870731	128870880	1000	+	.	gene_id "MSTRG.15074"; transcript_id "MSTRG.15074.2"; exon_number "4";
2	StringTie	transcript	128866680	128870880	1000	+	.	gene_id "MSTRG.15074"; transcript_id "MSTRG.15074.3";
2	StringTie	exon	128866680	128866982	1000	+	.	gene_id "MSTRG.15074"; transcript_id "MSTRG.15074.3"; exon_number "1";
2	StringTie	exon	128868056	128868180	1000	+	.	gene_id "MSTRG.15074"; transcript_id "MSTRG.15074.3"; exon_number "2";
2	StringTie	exon	128869331	128869457	1000	+	.	gene_id "MSTRG.15074"; transcript_id "MSTRG.15074.3"; exon_number "3";
2	StringTie	exon	128869547	128870645	1000	+	.	gene_id "MSTRG.15074"; transcript_id "MSTRG.15074.3"; exon_number "4";
2	StringTie	exon	128870731	128870880	1000	+	.	gene_id "MSTRG.15074"; transcript_id "MSTRG.15074.3"; exon_number "5";
2	StringTie	transcript	128866708	128870856	1000	+	.	gene_id "MSTRG.15074"; transcript_id "MSTRG.15074.4";
2	StringTie	exon	128866708	128866982	1000	+	.	gene_id "MSTRG.15074"; transcript_id "MSTRG.15074.4"; exon_number "1";
2	StringTie	exon	128868056	128868180	1000	+	.	gene_id "MSTRG.15074"; transcript_id "MSTRG.15074.4"; exon_number "2";
2	StringTie	exon	128869331	128869457	1000	+	.	gene_id "MSTRG.15074"; transcript_id "MSTRG.15074.4"; exon_number "3";
2	StringTie	exon	128869547	128869844	1000	+	.	gene_id "MSTRG.15074"; transcript_id "MSTRG.15074.4"; exon_number "4";
2	StringTie	exon	128870490	128870645	1000	+	.	gene_id "MSTRG.15074"; transcript_id "MSTRG.15074.4"; exon_number "5";
2	StringTie	exon	128870731	128870856	1000	+	.	gene_id "MSTRG.15074"; transcript_id "MSTRG.15074.4"; exon_number "6";
2	StringTie	transcript	128155019	128156359	1000	-	.	gene_id "MSTRG.15076"; transcript_id "MSTRG.15076.1";
2	StringTie	exon	128155019	128155091	1000	-	.	gene_id "MSTRG.15076"; transcript_id "MSTRG.15076.1"; exon_number "1";
2	StringTie	exon	128156140	128156359	1000	-	.	gene_id "MSTRG.15076"; transcript_id "MSTRG.15076.1"; exon_number "2";
2	StringTie	transcript	130521212	130569526	1000	+	.	gene_id "MSTRG.15094"; transcript_id "MSTRG.15094.2";
2	StringTie	exon	130521212	130521404	1000	+	.	gene_id "MSTRG.15094"; transcript_id "MSTRG.15094.2"; exon_number "1";
2	StringTie	exon	130569216	130569526	1000	+	.	gene_id "MSTRG.15094"; transcript_id "MSTRG.15094.2"; exon_number "2";
2	StringTie	transcript	130521212	130543865	1000	+	.	gene_id "MSTRG.15094"; transcript_id "MSTRG.15094.3";
2	StringTie	exon	130521212	130521404	1000	+	.	gene_id "MSTRG.15094"; transcript_id "MSTRG.15094.3"; exon_number "1";
2	StringTie	exon	130528929	130529383	1000	+	.	gene_id "MSTRG.15094"; transcript_id "MSTRG.15094.3"; exon_number "2";
2	StringTie	exon	130542620	130543865	1000	+	.	gene_id "MSTRG.15094"; transcript_id "MSTRG.15094.3"; exon_number "3";
2	StringTie	transcript	130938999	130951148	1000	-	.	gene_id "MSTRG.15098"; transcript_id "MSTRG.15098.1";
2	StringTie	exon	130938999	130940371	1000	-	.	gene_id "MSTRG.15098"; transcript_id "MSTRG.15098.1"; exon_number "1";
2	StringTie	exon	130950817	130951148	1000	-	.	gene_id "MSTRG.15098"; transcript_id "MSTRG.15098.1"; exon_number "2";
2	StringTie	transcript	130939178	130963854	1000	-	.	gene_id "MSTRG.15098"; transcript_id "MSTRG.15098.2";
2	StringTie	exon	130939178	130940371	1000	-	.	gene_id "MSTRG.15098"; transcript_id "MSTRG.15098.2"; exon_number "1";
2	StringTie	exon	130959844	130959943	1000	-	.	gene_id "MSTRG.15098"; transcript_id "MSTRG.15098.2"; exon_number "2";
2	StringTie	exon	130963789	130963854	1000	-	.	gene_id "MSTRG.15098"; transcript_id "MSTRG.15098.2"; exon_number "3";
2	StringTie	transcript	130973837	130981632	1000	-	.	gene_id "MSTRG.15099"; transcript_id "MSTRG.15099.1";
2	StringTie	exon	130973837	130973920	1000	-	.	gene_id "MSTRG.15099"; transcript_id "MSTRG.15099.1"; exon_number "1";
2	StringTie	exon	130980585	130981632	1000	-	.	gene_id "MSTRG.15099"; transcript_id "MSTRG.15099.1"; exon_number "2";
2	StringTie	transcript	130980238	130982429	1000	-	.	gene_id "MSTRG.15099"; transcript_id "MSTRG.15099.3";
2	StringTie	exon	130980238	130980496	1000	-	.	gene_id "MSTRG.15099"; transcript_id "MSTRG.15099.3"; exon_number "1";
2	StringTie	exon	130980585	130980662	1000	-	.	gene_id "MSTRG.15099"; transcript_id "MSTRG.15099.3"; exon_number "2";
2	StringTie	exon	130982347	130982429	1000	-	.	gene_id "MSTRG.15099"; transcript_id "MSTRG.15099.3"; exon_number "3";
2	StringTie	transcript	131824889	131848528	1000	+	.	gene_id "MSTRG.15110"; transcript_id "MSTRG.15110.1";
2	StringTie	exon	131824889	131827934	1000	+	.	gene_id "MSTRG.15110"; transcript_id "MSTRG.15110.1"; exon_number "1";
2	StringTie	exon	131829174	131829296	1000	+	.	gene_id "MSTRG.15110"; transcript_id "MSTRG.15110.1"; exon_number "2";
2	StringTie	exon	131836779	131836952	1000	+	.	gene_id "MSTRG.15110"; transcript_id "MSTRG.15110.1"; exon_number "3";
2	StringTie	exon	131838296	131838410	1000	+	.	gene_id "MSTRG.15110"; transcript_id "MSTRG.15110.1"; exon_number "4";
2	StringTie	exon	131847629	131848528	1000	+	.	gene_id "MSTRG.15110"; transcript_id "MSTRG.15110.1"; exon_number "5";
2	StringTie	transcript	135153123	135155251	1000	+	.	gene_id "MSTRG.15138"; transcript_id "MSTRG.15138.1";
2	StringTie	exon	135153123	135153150	1000	+	.	gene_id "MSTRG.15138"; transcript_id "MSTRG.15138.1"; exon_number "1";
2	StringTie	exon	135153447	135153633	1000	+	.	gene_id "MSTRG.15138"; transcript_id "MSTRG.15138.1"; exon_number "2";
2	StringTie	exon	135154349	135154424	1000	+	.	gene_id "MSTRG.15138"; transcript_id "MSTRG.15138.1"; exon_number "3";
2	StringTie	exon	135154875	135155251	1000	+	.	gene_id "MSTRG.15138"; transcript_id "MSTRG.15138.1"; exon_number "4";
2	StringTie	transcript	136686949	136707840	1000	+	.	gene_id "MSTRG.15175"; transcript_id "MSTRG.15175.1";
2	StringTie	exon	136686949	136686981	1000	+	.	gene_id "MSTRG.15175"; transcript_id "MSTRG.15175.1"; exon_number "1";
2	StringTie	exon	136692605	136692650	1000	+	.	gene_id "MSTRG.15175"; transcript_id "MSTRG.15175.1"; exon_number "2";
2	StringTie	exon	136707586	136707840	1000	+	.	gene_id "MSTRG.15175"; transcript_id "MSTRG.15175.1"; exon_number "3";
2	StringTie	transcript	136765129	136767160	1000	+	.	gene_id "MSTRG.15176"; transcript_id "MSTRG.15176.1";
2	StringTie	exon	136765129	136765165	1000	+	.	gene_id "MSTRG.15176"; transcript_id "MSTRG.15176.1"; exon_number "1";
2	StringTie	exon	136766817	136767160	1000	+	.	gene_id "MSTRG.15176"; transcript_id "MSTRG.15176.1"; exon_number "2";
2	StringTie	transcript	137427437	137442882	1000	+	.	gene_id "MSTRG.15188"; transcript_id "MSTRG.15188.1";
2	StringTie	exon	137427437	137427593	1000	+	.	gene_id "MSTRG.15188"; transcript_id "MSTRG.15188.1"; exon_number "1";
2	StringTie	exon	137442382	137442882	1000	+	.	gene_id "MSTRG.15188"; transcript_id "MSTRG.15188.1"; exon_number "2";
2	StringTie	transcript	138144310	138147260	1000	-	.	gene_id "MSTRG.15191"; transcript_id "MSTRG.15191.1";
2	StringTie	exon	138144310	138144807	1000	-	.	gene_id "MSTRG.15191"; transcript_id "MSTRG.15191.1"; exon_number "1";
2	StringTie	exon	138145491	138147260	1000	-	.	gene_id "MSTRG.15191"; transcript_id "MSTRG.15191.1"; exon_number "2";
2	StringTie	transcript	138149383	138154954	1000	-	.	gene_id "MSTRG.15193"; transcript_id "MSTRG.15193.1";
2	StringTie	exon	138149383	138149455	1000	-	.	gene_id "MSTRG.15193"; transcript_id "MSTRG.15193.1"; exon_number "1";
2	StringTie	exon	138151238	138151383	1000	-	.	gene_id "MSTRG.15193"; transcript_id "MSTRG.15193.1"; exon_number "2";
2	StringTie	exon	138154766	138154954	1000	-	.	gene_id "MSTRG.15193"; transcript_id "MSTRG.15193.1"; exon_number "3";
2	StringTie	transcript	141391475	141395815	1000	+	.	gene_id "MSTRG.15263"; transcript_id "MSTRG.15263.1";
2	StringTie	exon	141391475	141392428	1000	+	.	gene_id "MSTRG.15263"; transcript_id "MSTRG.15263.1"; exon_number "1";
2	StringTie	exon	141393580	141393718	1000	+	.	gene_id "MSTRG.15263"; transcript_id "MSTRG.15263.1"; exon_number "2";
2	StringTie	exon	141395566	141395815	1000	+	.	gene_id "MSTRG.15263"; transcript_id "MSTRG.15263.1"; exon_number "3";
2	StringTie	transcript	141592281	141592741	1000	+	.	gene_id "MSTRG.15266"; transcript_id "MSTRG.15266.1";
2	StringTie	exon	141592281	141592601	1000	+	.	gene_id "MSTRG.15266"; transcript_id "MSTRG.15266.1"; exon_number "1";
2	StringTie	exon	141592718	141592741	1000	+	.	gene_id "MSTRG.15266"; transcript_id "MSTRG.15266.1"; exon_number "2";
2	StringTie	transcript	141480990	141482330	1000	-	.	gene_id "MSTRG.15268"; transcript_id "MSTRG.15268.1";
2	StringTie	exon	141480990	141481264	1000	-	.	gene_id "MSTRG.15268"; transcript_id "MSTRG.15268.1"; exon_number "1";
2	StringTie	exon	141481401	141482330	1000	-	.	gene_id "MSTRG.15268"; transcript_id "MSTRG.15268.1"; exon_number "2";
2	StringTie	transcript	143935278	143939667	1000	+	.	gene_id "MSTRG.15367"; transcript_id "MSTRG.15367.1";
2	StringTie	exon	143935278	143935375	1000	+	.	gene_id "MSTRG.15367"; transcript_id "MSTRG.15367.1"; exon_number "1";
2	StringTie	exon	143939469	143939667	1000	+	.	gene_id "MSTRG.15367"; transcript_id "MSTRG.15367.1"; exon_number "2";
2	StringTie	transcript	144784620	144789503	1000	+	.	gene_id "MSTRG.15376"; transcript_id "MSTRG.15376.1";
2	StringTie	exon	144784620	144784660	1000	+	.	gene_id "MSTRG.15376"; transcript_id "MSTRG.15376.1"; exon_number "1";
2	StringTie	exon	144784923	144789503	1000	+	.	gene_id "MSTRG.15376"; transcript_id "MSTRG.15376.1"; exon_number "2";
2	StringTie	transcript	149065855	149068778	1000	+	.	gene_id "MSTRG.15402"; transcript_id "MSTRG.15402.1";
2	StringTie	exon	149065855	149065928	1000	+	.	gene_id "MSTRG.15402"; transcript_id "MSTRG.15402.1"; exon_number "1";
2	StringTie	exon	149068625	149068778	1000	+	.	gene_id "MSTRG.15402"; transcript_id "MSTRG.15402.1"; exon_number "2";
2	StringTie	transcript	150770953	150778000	1000	-	.	gene_id "MSTRG.15432"; transcript_id "MSTRG.15432.1";
2	StringTie	exon	150770953	150772162	1000	-	.	gene_id "MSTRG.15432"; transcript_id "MSTRG.15432.1"; exon_number "1";
2	StringTie	exon	150777694	150778000	1000	-	.	gene_id "MSTRG.15432"; transcript_id "MSTRG.15432.1"; exon_number "2";
2	StringTie	transcript	150771526	150777233	1000	-	.	gene_id "MSTRG.15432"; transcript_id "MSTRG.15432.2";
2	StringTie	exon	150771526	150772162	1000	-	.	gene_id "MSTRG.15432"; transcript_id "MSTRG.15432.2"; exon_number "1";
2	StringTie	exon	150773923	150777233	1000	-	.	gene_id "MSTRG.15432"; transcript_id "MSTRG.15432.2"; exon_number "2";
2	StringTie	transcript	150558673	150559946	1000	-	.	gene_id "MSTRG.15453"; transcript_id "MSTRG.15453.1";
2	StringTie	exon	150558673	150559186	1000	-	.	gene_id "MSTRG.15453"; transcript_id "MSTRG.15453.1"; exon_number "1";
2	StringTie	exon	150559855	150559946	1000	-	.	gene_id "MSTRG.15453"; transcript_id "MSTRG.15453.1"; exon_number "2";
2	StringTie	transcript	151747145	151757771	1000	+	.	gene_id "MSTRG.15487"; transcript_id "MSTRG.15487.4";
2	StringTie	exon	151747145	151748051	1000	+	.	gene_id "MSTRG.15487"; transcript_id "MSTRG.15487.4"; exon_number "1";
2	StringTie	exon	151751183	151757771	1000	+	.	gene_id "MSTRG.15487"; transcript_id "MSTRG.15487.4"; exon_number "2";
2	StringTie	transcript	151451942	151452978	1000	-	.	gene_id "MSTRG.15492"; transcript_id "MSTRG.15492.1";
2	StringTie	exon	151451942	151452090	1000	-	.	gene_id "MSTRG.15492"; transcript_id "MSTRG.15492.1"; exon_number "1";
2	StringTie	exon	151452425	151452978	1000	-	.	gene_id "MSTRG.15492"; transcript_id "MSTRG.15492.1"; exon_number "2";
3	StringTie	transcript	1719019	1720819	1000	-	.	gene_id "MSTRG.15540"; transcript_id "MSTRG.15540.1";
3	StringTie	exon	1719019	1719445	1000	-	.	gene_id "MSTRG.15540"; transcript_id "MSTRG.15540.1"; exon_number "1";
3	StringTie	exon	1720577	1720819	1000	-	.	gene_id "MSTRG.15540"; transcript_id "MSTRG.15540.1"; exon_number "2";
3	StringTie	transcript	2439422	2440514	1000	-	.	gene_id "MSTRG.15559"; transcript_id "MSTRG.15559.1";
3	StringTie	exon	2439422	2439795	1000	-	.	gene_id "MSTRG.15559"; transcript_id "MSTRG.15559.1"; exon_number "1";
3	StringTie	exon	2440309	2440514	1000	-	.	gene_id "MSTRG.15559"; transcript_id "MSTRG.15559.1"; exon_number "2";
3	StringTie	transcript	3547693	3552237	1000	+	.	gene_id "MSTRG.15564"; transcript_id "MSTRG.15564.1";
3	StringTie	exon	3547693	3547766	1000	+	.	gene_id "MSTRG.15564"; transcript_id "MSTRG.15564.1"; exon_number "1";
3	StringTie	exon	3551528	3552237	1000	+	.	gene_id "MSTRG.15564"; transcript_id "MSTRG.15564.1"; exon_number "2";
3	StringTie	transcript	4090570	4097495	1000	+	.	gene_id "MSTRG.15593"; transcript_id "MSTRG.15593.1";
3	StringTie	exon	4090570	4090762	1000	+	.	gene_id "MSTRG.15593"; transcript_id "MSTRG.15593.1"; exon_number "1";
3	StringTie	exon	4096768	4096877	1000	+	.	gene_id "MSTRG.15593"; transcript_id "MSTRG.15593.1"; exon_number "2";
3	StringTie	exon	4097302	4097495	1000	+	.	gene_id "MSTRG.15593"; transcript_id "MSTRG.15593.1"; exon_number "3";
3	StringTie	transcript	4090570	4094203	1000	+	.	gene_id "MSTRG.15593"; transcript_id "MSTRG.15593.2";
3	StringTie	exon	4090570	4090909	1000	+	.	gene_id "MSTRG.15593"; transcript_id "MSTRG.15593.2"; exon_number "1";
3	StringTie	exon	4093252	4094203	1000	+	.	gene_id "MSTRG.15593"; transcript_id "MSTRG.15593.2"; exon_number "2";
3	StringTie	transcript	4090576	4097497	1000	+	.	gene_id "MSTRG.15593"; transcript_id "MSTRG.15593.3";
3	StringTie	exon	4090576	4090784	1000	+	.	gene_id "MSTRG.15593"; transcript_id "MSTRG.15593.3"; exon_number "1";
3	StringTie	exon	4096768	4096877	1000	+	.	gene_id "MSTRG.15593"; transcript_id "MSTRG.15593.3"; exon_number "2";
3	StringTie	exon	4097302	4097497	1000	+	.	gene_id "MSTRG.15593"; transcript_id "MSTRG.15593.3"; exon_number "3";
3	StringTie	transcript	4120467	4124783	1000	+	.	gene_id "MSTRG.15598"; transcript_id "MSTRG.15598.1";
3	StringTie	exon	4120467	4121469	1000	+	.	gene_id "MSTRG.15598"; transcript_id "MSTRG.15598.1"; exon_number "1";
3	StringTie	exon	4123678	4124783	1000	+	.	gene_id "MSTRG.15598"; transcript_id "MSTRG.15598.1"; exon_number "2";
3	StringTie	transcript	4120526	4124255	1000	+	.	gene_id "MSTRG.15598"; transcript_id "MSTRG.15598.2";
3	StringTie	exon	4120526	4121469	1000	+	.	gene_id "MSTRG.15598"; transcript_id "MSTRG.15598.2"; exon_number "1";
3	StringTie	exon	4122439	4122476	1000	+	.	gene_id "MSTRG.15598"; transcript_id "MSTRG.15598.2"; exon_number "2";
3	StringTie	exon	4123678	4124255	1000	+	.	gene_id "MSTRG.15598"; transcript_id "MSTRG.15598.2"; exon_number "3";
3	StringTie	transcript	5462749	5463439	1000	-	.	gene_id "MSTRG.15632"; transcript_id "MSTRG.15632.1";
3	StringTie	exon	5462749	5462985	1000	-	.	gene_id "MSTRG.15632"; transcript_id "MSTRG.15632.1"; exon_number "1";
3	StringTie	exon	5463245	5463439	1000	-	.	gene_id "MSTRG.15632"; transcript_id "MSTRG.15632.1"; exon_number "2";
3	StringTie	transcript	6413006	6414658	1000	+	.	gene_id "MSTRG.15657"; transcript_id "MSTRG.15657.3";
3	StringTie	exon	6413006	6413358	1000	+	.	gene_id "MSTRG.15657"; transcript_id "MSTRG.15657.3"; exon_number "1";
3	StringTie	exon	6414362	6414481	1000	+	.	gene_id "MSTRG.15657"; transcript_id "MSTRG.15657.3"; exon_number "2";
3	StringTie	exon	6414603	6414658	1000	+	.	gene_id "MSTRG.15657"; transcript_id "MSTRG.15657.3"; exon_number "3";
3	StringTie	transcript	7650887	7651895	1000	-	.	gene_id "MSTRG.15685"; transcript_id "MSTRG.15685.1";
3	StringTie	exon	7650887	7651368	1000	-	.	gene_id "MSTRG.15685"; transcript_id "MSTRG.15685.1"; exon_number "1";
3	StringTie	exon	7651785	7651895	1000	-	.	gene_id "MSTRG.15685"; transcript_id "MSTRG.15685.1"; exon_number "2";
3	StringTie	transcript	8961252	8971520	1000	-	.	gene_id "MSTRG.15750"; transcript_id "MSTRG.15750.2";
3	StringTie	exon	8961252	8965042	1000	-	.	gene_id "MSTRG.15750"; transcript_id "MSTRG.15750.2"; exon_number "1";
3	StringTie	exon	8969135	8969400	1000	-	.	gene_id "MSTRG.15750"; transcript_id "MSTRG.15750.2"; exon_number "2";
3	StringTie	exon	8971222	8971520	1000	-	.	gene_id "MSTRG.15750"; transcript_id "MSTRG.15750.2"; exon_number "3";
3	StringTie	transcript	8965544	8969403	1000	-	.	gene_id "MSTRG.15750"; transcript_id "MSTRG.15750.3";
3	StringTie	exon	8965544	8965578	1000	-	.	gene_id "MSTRG.15750"; transcript_id "MSTRG.15750.3"; exon_number "1";
3	StringTie	exon	8969135	8969403	1000	-	.	gene_id "MSTRG.15750"; transcript_id "MSTRG.15750.3"; exon_number "2";
3	StringTie	transcript	10737212	10740729	1000	-	.	gene_id "MSTRG.15796"; transcript_id "MSTRG.15796.1";
3	StringTie	exon	10737212	10738068	1000	-	.	gene_id "MSTRG.15796"; transcript_id "MSTRG.15796.1"; exon_number "1";
3	StringTie	exon	10738640	10738839	1000	-	.	gene_id "MSTRG.15796"; transcript_id "MSTRG.15796.1"; exon_number "2";
3	StringTie	exon	10740556	10740729	1000	-	.	gene_id "MSTRG.15796"; transcript_id "MSTRG.15796.1"; exon_number "3";
3	StringTie	transcript	10738508	10740729	1000	-	.	gene_id "MSTRG.15796"; transcript_id "MSTRG.15796.3";
3	StringTie	exon	10738508	10738839	1000	-	.	gene_id "MSTRG.15796"; transcript_id "MSTRG.15796.3"; exon_number "1";
3	StringTie	exon	10740546	10740729	1000	-	.	gene_id "MSTRG.15796"; transcript_id "MSTRG.15796.3"; exon_number "2";
3	StringTie	transcript	16668016	16671499	1000	-	.	gene_id "MSTRG.15882"; transcript_id "MSTRG.15882.1";
3	StringTie	exon	16668016	16668177	1000	-	.	gene_id "MSTRG.15882"; transcript_id "MSTRG.15882.1"; exon_number "1";
3	StringTie	exon	16671389	16671499	1000	-	.	gene_id "MSTRG.15882"; transcript_id "MSTRG.15882.1"; exon_number "2";
3	StringTie	transcript	16802026	16803021	1000	-	.	gene_id "MSTRG.15898"; transcript_id "MSTRG.15898.1";
3	StringTie	exon	16802026	16802474	1000	-	.	gene_id "MSTRG.15898"; transcript_id "MSTRG.15898.1"; exon_number "1";
3	StringTie	exon	16802973	16803021	1000	-	.	gene_id "MSTRG.15898"; transcript_id "MSTRG.15898.1"; exon_number "2";
3	StringTie	transcript	17556252	17557065	1000	-	.	gene_id "MSTRG.15930"; transcript_id "MSTRG.15930.1";
3	StringTie	exon	17556252	17556671	1000	-	.	gene_id "MSTRG.15930"; transcript_id "MSTRG.15930.1"; exon_number "1";
3	StringTie	exon	17556923	17557065	1000	-	.	gene_id "MSTRG.15930"; transcript_id "MSTRG.15930.1"; exon_number "2";
3	StringTie	transcript	17599043	17604072	1000	-	.	gene_id "MSTRG.15933"; transcript_id "MSTRG.15933.2";
3	StringTie	exon	17599043	17600384	1000	-	.	gene_id "MSTRG.15933"; transcript_id "MSTRG.15933.2"; exon_number "1";
3	StringTie	exon	17603781	17604072	1000	-	.	gene_id "MSTRG.15933"; transcript_id "MSTRG.15933.2"; exon_number "2";
3	StringTie	transcript	18732938	18743439	1000	+	.	gene_id "MSTRG.15987"; transcript_id "MSTRG.15987.1";
3	StringTie	exon	18732938	18733133	1000	+	.	gene_id "MSTRG.15987"; transcript_id "MSTRG.15987.1"; exon_number "1";
3	StringTie	exon	18742793	18743439	1000	+	.	gene_id "MSTRG.15987"; transcript_id "MSTRG.15987.1"; exon_number "2";
3	StringTie	transcript	18530605	18533361	1000	-	.	gene_id "MSTRG.16016"; transcript_id "MSTRG.16016.1";
3	StringTie	exon	18530605	18531099	1000	-	.	gene_id "MSTRG.16016"; transcript_id "MSTRG.16016.1"; exon_number "1";
3	StringTie	exon	18532893	18533361	1000	-	.	gene_id "MSTRG.16016"; transcript_id "MSTRG.16016.1"; exon_number "2";
3	StringTie	transcript	37632801	37637985	1000	-	.	gene_id "MSTRG.16221"; transcript_id "MSTRG.16221.1";
3	StringTie	exon	37632801	37633243	1000	-	.	gene_id "MSTRG.16221"; transcript_id "MSTRG.16221.1"; exon_number "1";
3	StringTie	exon	37637609	37637985	1000	-	.	gene_id "MSTRG.16221"; transcript_id "MSTRG.16221.1"; exon_number "2";
3	StringTie	transcript	38672524	38672929	1000	-	.	gene_id "MSTRG.16283"; transcript_id "MSTRG.16283.1";
3	StringTie	exon	38672524	38672684	1000	-	.	gene_id "MSTRG.16283"; transcript_id "MSTRG.16283.1"; exon_number "1";
3	StringTie	exon	38672807	38672929	1000	-	.	gene_id "MSTRG.16283"; transcript_id "MSTRG.16283.1"; exon_number "2";
3	StringTie	transcript	38827052	38829271	1000	-	.	gene_id "MSTRG.16298"; transcript_id "MSTRG.16298.1";
3	StringTie	exon	38827052	38827562	1000	-	.	gene_id "MSTRG.16298"; transcript_id "MSTRG.16298.1"; exon_number "1";
3	StringTie	exon	38829167	38829271	1000	-	.	gene_id "MSTRG.16298"; transcript_id "MSTRG.16298.1"; exon_number "2";
3	StringTie	transcript	39177807	39180249	1000	-	.	gene_id "MSTRG.16305"; transcript_id "MSTRG.16305.1";
3	StringTie	exon	39177807	39177913	1000	-	.	gene_id "MSTRG.16305"; transcript_id "MSTRG.16305.1"; exon_number "1";
3	StringTie	exon	39180009	39180249	1000	-	.	gene_id "MSTRG.16305"; transcript_id "MSTRG.16305.1"; exon_number "2";
3	StringTie	transcript	40960757	40980641	1000	-	.	gene_id "MSTRG.16374"; transcript_id "MSTRG.16374.10";
3	StringTie	exon	40960757	40962746	1000	-	.	gene_id "MSTRG.16374"; transcript_id "MSTRG.16374.10"; exon_number "1";
3	StringTie	exon	40980515	40980641	1000	-	.	gene_id "MSTRG.16374"; transcript_id "MSTRG.16374.10"; exon_number "2";
3	StringTie	transcript	40167226	40170927	1000	-	.	gene_id "MSTRG.16436"; transcript_id "MSTRG.16436.2";
3	StringTie	exon	40167226	40167989	1000	-	.	gene_id "MSTRG.16436"; transcript_id "MSTRG.16436.2"; exon_number "1";
3	StringTie	exon	40168947	40170927	1000	-	.	gene_id "MSTRG.16436"; transcript_id "MSTRG.16436.2"; exon_number "2";
3	StringTie	transcript	40167614	40170933	1000	-	.	gene_id "MSTRG.16436"; transcript_id "MSTRG.16436.4";
3	StringTie	exon	40167614	40167989	1000	-	.	gene_id "MSTRG.16436"; transcript_id "MSTRG.16436.4"; exon_number "1";
3	StringTie	exon	40168947	40169154	1000	-	.	gene_id "MSTRG.16436"; transcript_id "MSTRG.16436.4"; exon_number "2";
3	StringTie	exon	40170124	40170933	1000	-	.	gene_id "MSTRG.16436"; transcript_id "MSTRG.16436.4"; exon_number "3";
3	StringTie	transcript	44022654	44024478	1000	+	.	gene_id "MSTRG.16507"; transcript_id "MSTRG.16507.1";
3	StringTie	exon	44022654	44023005	1000	+	.	gene_id "MSTRG.16507"; transcript_id "MSTRG.16507.1"; exon_number "1";
3	StringTie	exon	44023826	44024478	1000	+	.	gene_id "MSTRG.16507"; transcript_id "MSTRG.16507.1"; exon_number "2";
3	StringTie	transcript	43915995	43924196	1000	+	.	gene_id "MSTRG.16509"; transcript_id "MSTRG.16509.2";
3	StringTie	exon	43915995	43916244	1000	+	.	gene_id "MSTRG.16509"; transcript_id "MSTRG.16509.2"; exon_number "1";
3	StringTie	exon	43924079	43924196	1000	+	.	gene_id "MSTRG.16509"; transcript_id "MSTRG.16509.2"; exon_number "2";
3	StringTie	transcript	58097000	58118359	1000	+	.	gene_id "MSTRG.16718"; transcript_id "MSTRG.16718.1";
3	StringTie	exon	58097000	58097085	1000	+	.	gene_id "MSTRG.16718"; transcript_id "MSTRG.16718.1"; exon_number "1";
3	StringTie	exon	58098338	58098366	1000	+	.	gene_id "MSTRG.16718"; transcript_id "MSTRG.16718.1"; exon_number "2";
3	StringTie	exon	58112481	58112532	1000	+	.	gene_id "MSTRG.16718"; transcript_id "MSTRG.16718.1"; exon_number "3";
3	StringTie	exon	58116765	58118359	1000	+	.	gene_id "MSTRG.16718"; transcript_id "MSTRG.16718.1"; exon_number "4";
3	StringTie	transcript	59286033	59306807	1000	+	.	gene_id "MSTRG.16757"; transcript_id "MSTRG.16757.1";
3	StringTie	exon	59286033	59286244	1000	+	.	gene_id "MSTRG.16757"; transcript_id "MSTRG.16757.1"; exon_number "1";
3	StringTie	exon	59306305	59306807	1000	+	.	gene_id "MSTRG.16757"; transcript_id "MSTRG.16757.1"; exon_number "2";
3	StringTie	transcript	72325023	72343860	1000	+	.	gene_id "MSTRG.16889"; transcript_id "MSTRG.16889.1";
3	StringTie	exon	72325023	72325111	1000	+	.	gene_id "MSTRG.16889"; transcript_id "MSTRG.16889.1"; exon_number "1";
3	StringTie	exon	72335047	72335158	1000	+	.	gene_id "MSTRG.16889"; transcript_id "MSTRG.16889.1"; exon_number "2";
3	StringTie	exon	72339935	72340028	1000	+	.	gene_id "MSTRG.16889"; transcript_id "MSTRG.16889.1"; exon_number "3";
3	StringTie	exon	72343043	72343860	1000	+	.	gene_id "MSTRG.16889"; transcript_id "MSTRG.16889.1"; exon_number "4";
3	StringTie	transcript	76307045	76312423	1000	-	.	gene_id "MSTRG.16943"; transcript_id "MSTRG.16943.1";
3	StringTie	exon	76307045	76307496	1000	-	.	gene_id "MSTRG.16943"; transcript_id "MSTRG.16943.1"; exon_number "1";
3	StringTie	exon	76308654	76308767	1000	-	.	gene_id "MSTRG.16943"; transcript_id "MSTRG.16943.1"; exon_number "2";
3	StringTie	exon	76309150	76309199	1000	-	.	gene_id "MSTRG.16943"; transcript_id "MSTRG.16943.1"; exon_number "3";
3	StringTie	exon	76312370	76312423	1000	-	.	gene_id "MSTRG.16943"; transcript_id "MSTRG.16943.1"; exon_number "4";
3	StringTie	transcript	76320023	76320762	1000	-	.	gene_id "MSTRG.16944"; transcript_id "MSTRG.16944.1";
3	StringTie	exon	76320023	76320085	1000	-	.	gene_id "MSTRG.16944"; transcript_id "MSTRG.16944.1"; exon_number "1";
3	StringTie	exon	76320429	76320762	1000	-	.	gene_id "MSTRG.16944"; transcript_id "MSTRG.16944.1"; exon_number "2";
3	StringTie	transcript	77174043	77191923	1000	-	.	gene_id "MSTRG.16950"; transcript_id "MSTRG.16950.1";
3	StringTie	exon	77174043	77174112	1000	-	.	gene_id "MSTRG.16950"; transcript_id "MSTRG.16950.1"; exon_number "1";
3	StringTie	exon	77187515	77187609	1000	-	.	gene_id "MSTRG.16950"; transcript_id "MSTRG.16950.1"; exon_number "2";
3	StringTie	exon	77191728	77191923	1000	-	.	gene_id "MSTRG.16950"; transcript_id "MSTRG.16950.1"; exon_number "3";
3	StringTie	transcript	77532188	77632906	1000	+	.	gene_id "MSTRG.16962"; transcript_id "MSTRG.16962.1";
3	StringTie	exon	77532188	77532310	1000	+	.	gene_id "MSTRG.16962"; transcript_id "MSTRG.16962.1"; exon_number "1";
3	StringTie	exon	77583694	77583755	1000	+	.	gene_id "MSTRG.16962"; transcript_id "MSTRG.16962.1"; exon_number "2";
3	StringTie	exon	77632859	77632906	1000	+	.	gene_id "MSTRG.16962"; transcript_id "MSTRG.16962.1"; exon_number "3";
3	StringTie	transcript	77581574	77645492	1000	+	.	gene_id "MSTRG.16962"; transcript_id "MSTRG.16962.2";
3	StringTie	exon	77581574	77581641	1000	+	.	gene_id "MSTRG.16962"; transcript_id "MSTRG.16962.2"; exon_number "1";
3	StringTie	exon	77583694	77583755	1000	+	.	gene_id "MSTRG.16962"; transcript_id "MSTRG.16962.2"; exon_number "2";
3	StringTie	exon	77633347	77633727	1000	+	.	gene_id "MSTRG.16962"; transcript_id "MSTRG.16962.2"; exon_number "3";
3	StringTie	exon	77635790	77636133	1000	+	.	gene_id "MSTRG.16962"; transcript_id "MSTRG.16962.2"; exon_number "4";
3	StringTie	exon	77638025	77638128	1000	+	.	gene_id "MSTRG.16962"; transcript_id "MSTRG.16962.2"; exon_number "5";
3	StringTie	exon	77641334	77641513	1000	+	.	gene_id "MSTRG.16962"; transcript_id "MSTRG.16962.2"; exon_number "6";
3	StringTie	exon	77644885	77645492	1000	+	.	gene_id "MSTRG.16962"; transcript_id "MSTRG.16962.2"; exon_number "7";
3	StringTie	transcript	80119500	80120337	1000	+	.	gene_id "MSTRG.17009"; transcript_id "MSTRG.17009.1";
3	StringTie	exon	80119500	80119785	1000	+	.	gene_id "MSTRG.17009"; transcript_id "MSTRG.17009.1"; exon_number "1";
3	StringTie	exon	80120143	80120337	1000	+	.	gene_id "MSTRG.17009"; transcript_id "MSTRG.17009.1"; exon_number "2";
3	StringTie	transcript	80173973	80177041	1000	+	.	gene_id "MSTRG.17010"; transcript_id "MSTRG.17010.1";
3	StringTie	exon	80173973	80174069	1000	+	.	gene_id "MSTRG.17010"; transcript_id "MSTRG.17010.1"; exon_number "1";
3	StringTie	exon	80176732	80177041	1000	+	.	gene_id "MSTRG.17010"; transcript_id "MSTRG.17010.1"; exon_number "2";
3	StringTie	transcript	86578140	86580001	1000	-	.	gene_id "MSTRG.17062"; transcript_id "MSTRG.17062.1";
3	StringTie	exon	86578140	86578314	1000	-	.	gene_id "MSTRG.17062"; transcript_id "MSTRG.17062.1"; exon_number "1";
3	StringTie	exon	86579591	86580001	1000	-	.	gene_id "MSTRG.17062"; transcript_id "MSTRG.17062.1"; exon_number "2";
3	StringTie	transcript	86578140	86580063	1000	-	.	gene_id "MSTRG.17062"; transcript_id "MSTRG.17062.2";
3	StringTie	exon	86578140	86578314	1000	-	.	gene_id "MSTRG.17062"; transcript_id "MSTRG.17062.2"; exon_number "1";
3	StringTie	exon	86579640	86580063	1000	-	.	gene_id "MSTRG.17062"; transcript_id "MSTRG.17062.2"; exon_number "2";
3	StringTie	transcript	86578154	86579933	1000	-	.	gene_id "MSTRG.17062"; transcript_id "MSTRG.17062.3";
3	StringTie	exon	86578154	86578314	1000	-	.	gene_id "MSTRG.17062"; transcript_id "MSTRG.17062.3"; exon_number "1";
3	StringTie	exon	86579544	86579933	1000	-	.	gene_id "MSTRG.17062"; transcript_id "MSTRG.17062.3"; exon_number "2";
3	StringTie	transcript	86578155	86579915	1000	-	.	gene_id "MSTRG.17062"; transcript_id "MSTRG.17062.4";
3	StringTie	exon	86578155	86578314	1000	-	.	gene_id "MSTRG.17062"; transcript_id "MSTRG.17062.4"; exon_number "1";
3	StringTie	exon	86578887	86578928	1000	-	.	gene_id "MSTRG.17062"; transcript_id "MSTRG.17062.4"; exon_number "2";
3	StringTie	exon	86579591	86579915	1000	-	.	gene_id "MSTRG.17062"; transcript_id "MSTRG.17062.4"; exon_number "3";
3	StringTie	transcript	87119038	87231429	1000	-	.	gene_id "MSTRG.17105"; transcript_id "MSTRG.17105.6";
3	StringTie	exon	87119038	87120354	1000	-	.	gene_id "MSTRG.17105"; transcript_id "MSTRG.17105.6"; exon_number "1";
3	StringTie	exon	87149643	87149823	1000	-	.	gene_id "MSTRG.17105"; transcript_id "MSTRG.17105.6"; exon_number "2";
3	StringTie	exon	87231185	87231429	1000	-	.	gene_id "MSTRG.17105"; transcript_id "MSTRG.17105.6"; exon_number "3";
3	StringTie	transcript	87119945	87231327	1000	-	.	gene_id "MSTRG.17105"; transcript_id "MSTRG.17105.7";
3	StringTie	exon	87119945	87120354	1000	-	.	gene_id "MSTRG.17105"; transcript_id "MSTRG.17105.7"; exon_number "1";
3	StringTie	exon	87149655	87149823	1000	-	.	gene_id "MSTRG.17105"; transcript_id "MSTRG.17105.7"; exon_number "2";
3	StringTie	exon	87231185	87231327	1000	-	.	gene_id "MSTRG.17105"; transcript_id "MSTRG.17105.7"; exon_number "3";
3	StringTie	transcript	87146422	87231423	1000	-	.	gene_id "MSTRG.17105"; transcript_id "MSTRG.17105.8";
3	StringTie	exon	87146422	87146555	1000	-	.	gene_id "MSTRG.17105"; transcript_id "MSTRG.17105.8"; exon_number "1";
3	StringTie	exon	87149643	87149823	1000	-	.	gene_id "MSTRG.17105"; transcript_id "MSTRG.17105.8"; exon_number "2";
3	StringTie	exon	87231185	87231423	1000	-	.	gene_id "MSTRG.17105"; transcript_id "MSTRG.17105.8"; exon_number "3";
3	StringTie	transcript	94069854	94073865	1000	+	.	gene_id "MSTRG.17123"; transcript_id "MSTRG.17123.1";
3	StringTie	exon	94069854	94069934	1000	+	.	gene_id "MSTRG.17123"; transcript_id "MSTRG.17123.1"; exon_number "1";
3	StringTie	exon	94073310	94073865	1000	+	.	gene_id "MSTRG.17123"; transcript_id "MSTRG.17123.1"; exon_number "2";
3	StringTie	transcript	96392914	96398511	1000	-	.	gene_id "MSTRG.17151"; transcript_id "MSTRG.17151.2";
3	StringTie	exon	96392914	96393308	1000	-	.	gene_id "MSTRG.17151"; transcript_id "MSTRG.17151.2"; exon_number "1";
3	StringTie	exon	96398191	96398511	1000	-	.	gene_id "MSTRG.17151"; transcript_id "MSTRG.17151.2"; exon_number "2";
3	StringTie	transcript	97578431	97580610	1000	-	.	gene_id "MSTRG.17169"; transcript_id "MSTRG.17169.1";
3	StringTie	exon	97578431	97578550	1000	-	.	gene_id "MSTRG.17169"; transcript_id "MSTRG.17169.1"; exon_number "1";
3	StringTie	exon	97580511	97580610	1000	-	.	gene_id "MSTRG.17169"; transcript_id "MSTRG.17169.1"; exon_number "2";
3	StringTie	transcript	97387913	97391344	1000	-	.	gene_id "MSTRG.17172"; transcript_id "MSTRG.17172.1";
3	StringTie	exon	97387913	97389527	1000	-	.	gene_id "MSTRG.17172"; transcript_id "MSTRG.17172.1"; exon_number "1";
3	StringTie	exon	97391109	97391344	1000	-	.	gene_id "MSTRG.17172"; transcript_id "MSTRG.17172.1"; exon_number "2";
3	StringTie	transcript	97387939	97389722	1000	-	.	gene_id "MSTRG.17172"; transcript_id "MSTRG.17172.2";
3	StringTie	exon	97387939	97388675	1000	-	.	gene_id "MSTRG.17172"; transcript_id "MSTRG.17172.2"; exon_number "1";
3	StringTie	exon	97389386	97389722	1000	-	.	gene_id "MSTRG.17172"; transcript_id "MSTRG.17172.2"; exon_number "2";
3	StringTie	transcript	101743799	101753199	1000	-	.	gene_id "MSTRG.17235"; transcript_id "MSTRG.17235.1";
3	StringTie	exon	101743799	101743986	1000	-	.	gene_id "MSTRG.17235"; transcript_id "MSTRG.17235.1"; exon_number "1";
3	StringTie	exon	101748608	101748747	1000	-	.	gene_id "MSTRG.17235"; transcript_id "MSTRG.17235.1"; exon_number "2";
3	StringTie	exon	101753021	101753199	1000	-	.	gene_id "MSTRG.17235"; transcript_id "MSTRG.17235.1"; exon_number "3";
3	StringTie	transcript	114848839	114849759	1000	-	.	gene_id "MSTRG.17400"; transcript_id "MSTRG.17400.1";
3	StringTie	exon	114848839	114848902	1000	-	.	gene_id "MSTRG.17400"; transcript_id "MSTRG.17400.1"; exon_number "1";
3	StringTie	exon	114849564	114849759	1000	-	.	gene_id "MSTRG.17400"; transcript_id "MSTRG.17400.1"; exon_number "2";
3	StringTie	transcript	115440997	115458396	1000	+	.	gene_id "MSTRG.17406"; transcript_id "MSTRG.17406.1";
3	StringTie	exon	115440997	115441103	1000	+	.	gene_id "MSTRG.17406"; transcript_id "MSTRG.17406.1"; exon_number "1";
3	StringTie	exon	115456167	115456209	1000	+	.	gene_id "MSTRG.17406"; transcript_id "MSTRG.17406.1"; exon_number "2";
3	StringTie	exon	115456988	115458396	1000	+	.	gene_id "MSTRG.17406"; transcript_id "MSTRG.17406.1"; exon_number "3";
3	StringTie	transcript	124800020	124803655	1000	-	.	gene_id "MSTRG.17466"; transcript_id "MSTRG.17466.1";
3	StringTie	exon	124800020	124800219	1000	-	.	gene_id "MSTRG.17466"; transcript_id "MSTRG.17466.1"; exon_number "1";
3	StringTie	exon	124803629	124803655	1000	-	.	gene_id "MSTRG.17466"; transcript_id "MSTRG.17466.1"; exon_number "2";
3	StringTie	transcript	127869835	127874359	1000	-	.	gene_id "MSTRG.17506"; transcript_id "MSTRG.17506.1";
3	StringTie	exon	127869835	127870152	1000	-	.	gene_id "MSTRG.17506"; transcript_id "MSTRG.17506.1"; exon_number "1";
3	StringTie	exon	127870991	127871133	1000	-	.	gene_id "MSTRG.17506"; transcript_id "MSTRG.17506.1"; exon_number "2";
3	StringTie	exon	127874148	127874359	1000	-	.	gene_id "MSTRG.17506"; transcript_id "MSTRG.17506.1"; exon_number "3";
3	StringTie	transcript	127518355	127524455	1000	-	.	gene_id "MSTRG.17507"; transcript_id "MSTRG.17507.1";
3	StringTie	exon	127518355	127522464	1000	-	.	gene_id "MSTRG.17507"; transcript_id "MSTRG.17507.1"; exon_number "1";
3	StringTie	exon	127522989	127523179	1000	-	.	gene_id "MSTRG.17507"; transcript_id "MSTRG.17507.1"; exon_number "2";
3	StringTie	exon	127524408	127524455	1000	-	.	gene_id "MSTRG.17507"; transcript_id "MSTRG.17507.1"; exon_number "3";
3	StringTie	transcript	128480138	128495480	1000	+	.	gene_id "MSTRG.17508"; transcript_id "MSTRG.17508.1";
3	StringTie	exon	128480138	128480287	1000	+	.	gene_id "MSTRG.17508"; transcript_id "MSTRG.17508.1"; exon_number "1";
3	StringTie	exon	128487204	128487308	1000	+	.	gene_id "MSTRG.17508"; transcript_id "MSTRG.17508.1"; exon_number "2";
3	StringTie	exon	128495462	128495480	1000	+	.	gene_id "MSTRG.17508"; transcript_id "MSTRG.17508.1"; exon_number "3";
4	StringTie	transcript	153290	159112	1000	-	.	gene_id "MSTRG.17547"; transcript_id "MSTRG.17547.1";
4	StringTie	exon	153290	153976	1000	-	.	gene_id "MSTRG.17547"; transcript_id "MSTRG.17547.1"; exon_number "1";
4	StringTie	exon	157993	159112	1000	-	.	gene_id "MSTRG.17547"; transcript_id "MSTRG.17547.1"; exon_number "2";
4	StringTie	transcript	153290	159112	1000	-	.	gene_id "MSTRG.17547"; transcript_id "MSTRG.17547.2";
4	StringTie	exon	153290	153976	1000	-	.	gene_id "MSTRG.17547"; transcript_id "MSTRG.17547.2"; exon_number "1";
4	StringTie	exon	157993	158600	1000	-	.	gene_id "MSTRG.17547"; transcript_id "MSTRG.17547.2"; exon_number "2";
4	StringTie	exon	158761	159112	1000	-	.	gene_id "MSTRG.17547"; transcript_id "MSTRG.17547.2"; exon_number "3";
4	StringTie	transcript	153315	159082	1000	-	.	gene_id "MSTRG.17547"; transcript_id "MSTRG.17547.3";
4	StringTie	exon	153315	153976	1000	-	.	gene_id "MSTRG.17547"; transcript_id "MSTRG.17547.3"; exon_number "1";
4	StringTie	exon	158307	159082	1000	-	.	gene_id "MSTRG.17547"; transcript_id "MSTRG.17547.3"; exon_number "2";
4	StringTie	transcript	153319	159100	1000	-	.	gene_id "MSTRG.17547"; transcript_id "MSTRG.17547.4";
4	StringTie	exon	153319	153976	1000	-	.	gene_id "MSTRG.17547"; transcript_id "MSTRG.17547.4"; exon_number "1";
4	StringTie	exon	157993	158603	1000	-	.	gene_id "MSTRG.17547"; transcript_id "MSTRG.17547.4"; exon_number "2";
4	StringTie	exon	158761	159100	1000	-	.	gene_id "MSTRG.17547"; transcript_id "MSTRG.17547.4"; exon_number "3";
4	StringTie	transcript	153339	159111	1000	-	.	gene_id "MSTRG.17547"; transcript_id "MSTRG.17547.5";
4	StringTie	exon	153339	153976	1000	-	.	gene_id "MSTRG.17547"; transcript_id "MSTRG.17547.5"; exon_number "1";
4	StringTie	exon	158761	159111	1000	-	.	gene_id "MSTRG.17547"; transcript_id "MSTRG.17547.5"; exon_number "2";
4	StringTie	transcript	6958691	6961219	1000	+	.	gene_id "MSTRG.17675"; transcript_id "MSTRG.17675.2";
4	StringTie	exon	6958691	6959081	1000	+	.	gene_id "MSTRG.17675"; transcript_id "MSTRG.17675.2"; exon_number "1";
4	StringTie	exon	6960140	6961219	1000	+	.	gene_id "MSTRG.17675"; transcript_id "MSTRG.17675.2"; exon_number "2";
4	StringTie	transcript	7381142	7399368	1000	+	.	gene_id "MSTRG.17689"; transcript_id "MSTRG.17689.1";
4	StringTie	exon	7381142	7381369	1000	+	.	gene_id "MSTRG.17689"; transcript_id "MSTRG.17689.1"; exon_number "1";
4	StringTie	exon	7399173	7399368	1000	+	.	gene_id "MSTRG.17689"; transcript_id "MSTRG.17689.1"; exon_number "2";
4	StringTie	transcript	7557213	7572035	1000	-	.	gene_id "MSTRG.17691"; transcript_id "MSTRG.17691.1";
4	StringTie	exon	7557213	7558651	1000	-	.	gene_id "MSTRG.17691"; transcript_id "MSTRG.17691.1"; exon_number "1";
4	StringTie	exon	7571895	7572035	1000	-	.	gene_id "MSTRG.17691"; transcript_id "MSTRG.17691.1"; exon_number "2";
4	StringTie	transcript	7812236	7813847	1000	-	.	gene_id "MSTRG.17696"; transcript_id "MSTRG.17696.1";
4	StringTie	exon	7812236	7812346	1000	-	.	gene_id "MSTRG.17696"; transcript_id "MSTRG.17696.1"; exon_number "1";
4	StringTie	exon	7812514	7813847	1000	-	.	gene_id "MSTRG.17696"; transcript_id "MSTRG.17696.1"; exon_number "2";
4	StringTie	transcript	12440786	12444946	1000	+	.	gene_id "MSTRG.17719"; transcript_id "MSTRG.17719.1";
4	StringTie	exon	12440786	12441053	1000	+	.	gene_id "MSTRG.17719"; transcript_id "MSTRG.17719.1"; exon_number "1";
4	StringTie	exon	12443859	12443954	1000	+	.	gene_id "MSTRG.17719"; transcript_id "MSTRG.17719.1"; exon_number "2";
4	StringTie	exon	12444831	12444946	1000	+	.	gene_id "MSTRG.17719"; transcript_id "MSTRG.17719.1"; exon_number "3";
4	StringTie	transcript	14788101	14825657	1000	-	.	gene_id "MSTRG.17755"; transcript_id "MSTRG.17755.1";
4	StringTie	exon	14788101	14789092	1000	-	.	gene_id "MSTRG.17755"; transcript_id "MSTRG.17755.1"; exon_number "1";
4	StringTie	exon	14818698	14818889	1000	-	.	gene_id "MSTRG.17755"; transcript_id "MSTRG.17755.1"; exon_number "2";
4	StringTie	exon	14825618	14825657	1000	-	.	gene_id "MSTRG.17755"; transcript_id "MSTRG.17755.1"; exon_number "3";
4	StringTie	transcript	14788176	14819900	1000	-	.	gene_id "MSTRG.17755"; transcript_id "MSTRG.17755.2";
4	StringTie	exon	14788176	14789092	1000	-	.	gene_id "MSTRG.17755"; transcript_id "MSTRG.17755.2"; exon_number "1";
4	StringTie	exon	14818698	14818889	1000	-	.	gene_id "MSTRG.17755"; transcript_id "MSTRG.17755.2"; exon_number "2";
4	StringTie	exon	14819835	14819900	1000	-	.	gene_id "MSTRG.17755"; transcript_id "MSTRG.17755.2"; exon_number "3";
4	StringTie	transcript	15396276	15397161	1000	+	.	gene_id "MSTRG.17761"; transcript_id "MSTRG.17761.1";
4	StringTie	exon	15396276	15396389	1000	+	.	gene_id "MSTRG.17761"; transcript_id "MSTRG.17761.1"; exon_number "1";
4	StringTie	exon	15396593	15396703	1000	+	.	gene_id "MSTRG.17761"; transcript_id "MSTRG.17761.1"; exon_number "2";
4	StringTie	exon	15396916	15397161	1000	+	.	gene_id "MSTRG.17761"; transcript_id "MSTRG.17761.1"; exon_number "3";
4	StringTie	transcript	15396280	15397122	1000	+	.	gene_id "MSTRG.17761"; transcript_id "MSTRG.17761.2";
4	StringTie	exon	15396280	15396389	1000	+	.	gene_id "MSTRG.17761"; transcript_id "MSTRG.17761.2"; exon_number "1";
4	StringTie	exon	15396916	15397122	1000	+	.	gene_id "MSTRG.17761"; transcript_id "MSTRG.17761.2"; exon_number "2";
4	StringTie	transcript	16570188	16570988	1000	-	.	gene_id "MSTRG.17790"; transcript_id "MSTRG.17790.1";
4	StringTie	exon	16570188	16570682	1000	-	.	gene_id "MSTRG.17790"; transcript_id "MSTRG.17790.1"; exon_number "1";
4	StringTie	exon	16570847	16570988	1000	-	.	gene_id "MSTRG.17790"; transcript_id "MSTRG.17790.1"; exon_number "2";
4	StringTie	transcript	17251237	17253231	1000	-	.	gene_id "MSTRG.17798"; transcript_id "MSTRG.17798.1";
4	StringTie	exon	17251237	17251555	1000	-	.	gene_id "MSTRG.17798"; transcript_id "MSTRG.17798.1"; exon_number "1";
4	StringTie	exon	17252662	17252696	1000	-	.	gene_id "MSTRG.17798"; transcript_id "MSTRG.17798.1"; exon_number "2";
4	StringTie	exon	17252985	17253231	1000	-	.	gene_id "MSTRG.17798"; transcript_id "MSTRG.17798.1"; exon_number "3";
4	StringTie	transcript	34328266	34332527	1000	-	.	gene_id "MSTRG.17890"; transcript_id "MSTRG.17890.1";
4	StringTie	exon	34328266	34329154	1000	-	.	gene_id "MSTRG.17890"; transcript_id "MSTRG.17890.1"; exon_number "1";
4	StringTie	exon	34332246	34332527	1000	-	.	gene_id "MSTRG.17890"; transcript_id "MSTRG.17890.1"; exon_number "2";
4	StringTie	transcript	34328463	34332453	1000	-	.	gene_id "MSTRG.17890"; transcript_id "MSTRG.17890.2";
4	StringTie	exon	34328463	34328905	1000	-	.	gene_id "MSTRG.17890"; transcript_id "MSTRG.17890.2"; exon_number "1";
4	StringTie	exon	34329011	34329154	1000	-	.	gene_id "MSTRG.17890"; transcript_id "MSTRG.17890.2"; exon_number "2";
4	StringTie	exon	34332246	34332453	1000	-	.	gene_id "MSTRG.17890"; transcript_id "MSTRG.17890.2"; exon_number "3";
4	StringTie	transcript	41665498	41670177	1000	+	.	gene_id "MSTRG.17980"; transcript_id "MSTRG.17980.3";
4	StringTie	exon	41665498	41665601	1000	+	.	gene_id "MSTRG.17980"; transcript_id "MSTRG.17980.3"; exon_number "1";
4	StringTie	exon	41668344	41668414	1000	+	.	gene_id "MSTRG.17980"; transcript_id "MSTRG.17980.3"; exon_number "2";
4	StringTie	exon	41668552	41670177	1000	+	.	gene_id "MSTRG.17980"; transcript_id "MSTRG.17980.3"; exon_number "3";
4	StringTie	transcript	41665512	41669383	1000	+	.	gene_id "MSTRG.17980"; transcript_id "MSTRG.17980.5";
4	StringTie	exon	41665512	41665601	1000	+	.	gene_id "MSTRG.17980"; transcript_id "MSTRG.17980.5"; exon_number "1";
4	StringTie	exon	41668344	41668410	1000	+	.	gene_id "MSTRG.17980"; transcript_id "MSTRG.17980.5"; exon_number "2";
4	StringTie	exon	41668552	41669383	1000	+	.	gene_id "MSTRG.17980"; transcript_id "MSTRG.17980.5"; exon_number "3";
4	StringTie	transcript	42784359	42814046	1000	-	.	gene_id "MSTRG.18001"; transcript_id "MSTRG.18001.1";
4	StringTie	exon	42784359	42786240	1000	-	.	gene_id "MSTRG.18001"; transcript_id "MSTRG.18001.1"; exon_number "1";
4	StringTie	exon	42788526	42788620	1000	-	.	gene_id "MSTRG.18001"; transcript_id "MSTRG.18001.1"; exon_number "2";
4	StringTie	exon	42788719	42789028	1000	-	.	gene_id "MSTRG.18001"; transcript_id "MSTRG.18001.1"; exon_number "3";
4	StringTie	exon	42795487	42795962	1000	-	.	gene_id "MSTRG.18001"; transcript_id "MSTRG.18001.1"; exon_number "4";
4	StringTie	exon	42813437	42814046	1000	-	.	gene_id "MSTRG.18001"; transcript_id "MSTRG.18001.1"; exon_number "5";
4	StringTie	transcript	42784409	42813894	1000	-	.	gene_id "MSTRG.18001"; transcript_id "MSTRG.18001.2";
4	StringTie	exon	42784409	42785138	1000	-	.	gene_id "MSTRG.18001"; transcript_id "MSTRG.18001.2"; exon_number "1";
4	StringTie	exon	42785981	42786240	1000	-	.	gene_id "MSTRG.18001"; transcript_id "MSTRG.18001.2"; exon_number "2";
4	StringTie	exon	42788526	42788620	1000	-	.	gene_id "MSTRG.18001"; transcript_id "MSTRG.18001.2"; exon_number "3";
4	StringTie	exon	42788719	42789028	1000	-	.	gene_id "MSTRG.18001"; transcript_id "MSTRG.18001.2"; exon_number "4";
4	StringTie	exon	42795043	42795962	1000	-	.	gene_id "MSTRG.18001"; transcript_id "MSTRG.18001.2"; exon_number "5";
4	StringTie	exon	42813437	42813894	1000	-	.	gene_id "MSTRG.18001"; transcript_id "MSTRG.18001.2"; exon_number "6";
4	StringTie	transcript	42807172	42826483	1000	+	.	gene_id "MSTRG.18002"; transcript_id "MSTRG.18002.1";
4	StringTie	exon	42807172	42807554	1000	+	.	gene_id "MSTRG.18002"; transcript_id "MSTRG.18002.1"; exon_number "1";
4	StringTie	exon	42824716	42826483	1000	+	.	gene_id "MSTRG.18002"; transcript_id "MSTRG.18002.1"; exon_number "2";
4	StringTie	transcript	42807321	42825578	1000	+	.	gene_id "MSTRG.18002"; transcript_id "MSTRG.18002.2";
4	StringTie	exon	42807321	42807554	1000	+	.	gene_id "MSTRG.18002"; transcript_id "MSTRG.18002.2"; exon_number "1";
4	StringTie	exon	42811808	42811980	1000	+	.	gene_id "MSTRG.18002"; transcript_id "MSTRG.18002.2"; exon_number "2";
4	StringTie	exon	42824716	42825578	1000	+	.	gene_id "MSTRG.18002"; transcript_id "MSTRG.18002.2"; exon_number "3";
4	StringTie	transcript	55156501	55167855	1000	-	.	gene_id "MSTRG.18077"; transcript_id "MSTRG.18077.5";
4	StringTie	exon	55156501	55158093	1000	-	.	gene_id "MSTRG.18077"; transcript_id "MSTRG.18077.5"; exon_number "1";
4	StringTie	exon	55167608	55167855	1000	-	.	gene_id "MSTRG.18077"; transcript_id "MSTRG.18077.5"; exon_number "2";
4	StringTie	transcript	56175085	56178232	1000	+	.	gene_id "MSTRG.18085"; transcript_id "MSTRG.18085.1";
4	StringTie	exon	56175085	56175626	1000	+	.	gene_id "MSTRG.18085"; transcript_id "MSTRG.18085.1"; exon_number "1";
4	StringTie	exon	56176012	56178232	1000	+	.	gene_id "MSTRG.18085"; transcript_id "MSTRG.18085.1"; exon_number "2";
4	StringTie	transcript	59617701	59624956	1000	+	.	gene_id "MSTRG.18110"; transcript_id "MSTRG.18110.1";
4	StringTie	exon	59617701	59617989	1000	+	.	gene_id "MSTRG.18110"; transcript_id "MSTRG.18110.1"; exon_number "1";
4	StringTie	exon	59624726	59624956	1000	+	.	gene_id "MSTRG.18110"; transcript_id "MSTRG.18110.1"; exon_number "2";
4	StringTie	transcript	75294174	75296359	1000	-	.	gene_id "MSTRG.18216"; transcript_id "MSTRG.18216.1";
4	StringTie	exon	75294174	75294486	1000	-	.	gene_id "MSTRG.18216"; transcript_id "MSTRG.18216.1"; exon_number "1";
4	StringTie	exon	75295842	75296359	1000	-	.	gene_id "MSTRG.18216"; transcript_id "MSTRG.18216.1"; exon_number "2";
4	StringTie	transcript	75756858	75762071	1000	-	.	gene_id "MSTRG.18228"; transcript_id "MSTRG.18228.1";
4	StringTie	exon	75756858	75757417	1000	-	.	gene_id "MSTRG.18228"; transcript_id "MSTRG.18228.1"; exon_number "1";
4	StringTie	exon	75761291	75762071	1000	-	.	gene_id "MSTRG.18228"; transcript_id "MSTRG.18228.1"; exon_number "2";
4	StringTie	transcript	79523748	79548293	1000	-	.	gene_id "MSTRG.18257"; transcript_id "MSTRG.18257.1";
4	StringTie	exon	79523748	79523797	1000	-	.	gene_id "MSTRG.18257"; transcript_id "MSTRG.18257.1"; exon_number "1";
4	StringTie	exon	79548021	79548293	1000	-	.	gene_id "MSTRG.18257"; transcript_id "MSTRG.18257.1"; exon_number "2";
4	StringTie	transcript	79542320	79548298	1000	-	.	gene_id "MSTRG.18257"; transcript_id "MSTRG.18257.2";
4	StringTie	exon	79542320	79543283	1000	-	.	gene_id "MSTRG.18257"; transcript_id "MSTRG.18257.2"; exon_number "1";
4	StringTie	exon	79548021	79548298	1000	-	.	gene_id "MSTRG.18257"; transcript_id "MSTRG.18257.2"; exon_number "2";
4	StringTie	transcript	79542611	79548293	1000	-	.	gene_id "MSTRG.18257"; transcript_id "MSTRG.18257.3";
4	StringTie	exon	79542611	79543280	1000	-	.	gene_id "MSTRG.18257"; transcript_id "MSTRG.18257.3"; exon_number "1";
4	StringTie	exon	79548021	79548293	1000	-	.	gene_id "MSTRG.18257"; transcript_id "MSTRG.18257.3"; exon_number "2";
4	StringTie	transcript	82794640	82802447	1000	+	.	gene_id "MSTRG.18300"; transcript_id "MSTRG.18300.1";
4	StringTie	exon	82794640	82794952	1000	+	.	gene_id "MSTRG.18300"; transcript_id "MSTRG.18300.1"; exon_number "1";
4	StringTie	exon	82799779	82802447	1000	+	.	gene_id "MSTRG.18300"; transcript_id "MSTRG.18300.1"; exon_number "2";
4	StringTie	transcript	82162444	82166435	1000	+	.	gene_id "MSTRG.18303"; transcript_id "MSTRG.18303.37";
4	StringTie	exon	82162444	82163019	1000	+	.	gene_id "MSTRG.18303"; transcript_id "MSTRG.18303.37"; exon_number "1";
4	StringTie	exon	82164092	82164130	1000	+	.	gene_id "MSTRG.18303"; transcript_id "MSTRG.18303.37"; exon_number "2";
4	StringTie	exon	82164853	82166435	1000	+	.	gene_id "MSTRG.18303"; transcript_id "MSTRG.18303.37"; exon_number "3";
4	StringTie	transcript	82162819	82177360	1000	+	.	gene_id "MSTRG.18303"; transcript_id "MSTRG.18303.39";
4	StringTie	exon	82162819	82163019	1000	+	.	gene_id "MSTRG.18303"; transcript_id "MSTRG.18303.39"; exon_number "1";
4	StringTie	exon	82173291	82173373	1000	+	.	gene_id "MSTRG.18303"; transcript_id "MSTRG.18303.39"; exon_number "2";
4	StringTie	exon	82176323	82177360	1000	+	.	gene_id "MSTRG.18303"; transcript_id "MSTRG.18303.39"; exon_number "3";
4	StringTie	transcript	85136981	85138780	1000	-	.	gene_id "MSTRG.18341"; transcript_id "MSTRG.18341.1";
4	StringTie	exon	85136981	85137663	1000	-	.	gene_id "MSTRG.18341"; transcript_id "MSTRG.18341.1"; exon_number "1";
4	StringTie	exon	85138450	85138780	1000	-	.	gene_id "MSTRG.18341"; transcript_id "MSTRG.18341.1"; exon_number "2";
4	StringTie	transcript	87194277	87246746	1000	+	.	gene_id "MSTRG.18358"; transcript_id "MSTRG.18358.1";
4	StringTie	exon	87194277	87194512	1000	+	.	gene_id "MSTRG.18358"; transcript_id "MSTRG.18358.1"; exon_number "1";
4	StringTie	exon	87246424	87246746	1000	+	.	gene_id "MSTRG.18358"; transcript_id "MSTRG.18358.1"; exon_number "2";
4	StringTie	transcript	87194306	87199312	1000	+	.	gene_id "MSTRG.18358"; transcript_id "MSTRG.18358.2";
4	StringTie	exon	87194306	87194512	1000	+	.	gene_id "MSTRG.18358"; transcript_id "MSTRG.18358.2"; exon_number "1";
4	StringTie	exon	87197093	87199312	1000	+	.	gene_id "MSTRG.18358"; transcript_id "MSTRG.18358.2"; exon_number "2";
4	StringTie	transcript	96692464	96693723	1000	-	.	gene_id "MSTRG.18589"; transcript_id "MSTRG.18589.1";
4	StringTie	exon	96692464	96693027	1000	-	.	gene_id "MSTRG.18589"; transcript_id "MSTRG.18589.1"; exon_number "1";
4	StringTie	exon	96693679	96693723	1000	-	.	gene_id "MSTRG.18589"; transcript_id "MSTRG.18589.1"; exon_number "2";
4	StringTie	transcript	98332498	98333073	1000	-	.	gene_id "MSTRG.18659"; transcript_id "MSTRG.18659.1";
4	StringTie	exon	98332498	98332689	1000	-	.	gene_id "MSTRG.18659"; transcript_id "MSTRG.18659.1"; exon_number "1";
4	StringTie	exon	98333024	98333073	1000	-	.	gene_id "MSTRG.18659"; transcript_id "MSTRG.18659.1"; exon_number "2";
4	StringTie	transcript	100440821	100443809	1000	-	.	gene_id "MSTRG.18734"; transcript_id "MSTRG.18734.4";
4	StringTie	exon	100440821	100442165	1000	-	.	gene_id "MSTRG.18734"; transcript_id "MSTRG.18734.4"; exon_number "1";
4	StringTie	exon	100443084	100443194	1000	-	.	gene_id "MSTRG.18734"; transcript_id "MSTRG.18734.4"; exon_number "2";
4	StringTie	exon	100443631	100443809	1000	-	.	gene_id "MSTRG.18734"; transcript_id "MSTRG.18734.4"; exon_number "3";
4	StringTie	transcript	100441489	100443721	1000	-	.	gene_id "MSTRG.18734"; transcript_id "MSTRG.18734.5";
4	StringTie	exon	100441489	100442185	1000	-	.	gene_id "MSTRG.18734"; transcript_id "MSTRG.18734.5"; exon_number "1";
4	StringTie	exon	100443084	100443194	1000	-	.	gene_id "MSTRG.18734"; transcript_id "MSTRG.18734.5"; exon_number "2";
4	StringTie	exon	100443631	100443721	1000	-	.	gene_id "MSTRG.18734"; transcript_id "MSTRG.18734.5"; exon_number "3";
4	StringTie	transcript	101480739	101482459	1000	+	.	gene_id "MSTRG.18761"; transcript_id "MSTRG.18761.1";
4	StringTie	exon	101480739	101480838	1000	+	.	gene_id "MSTRG.18761"; transcript_id "MSTRG.18761.1"; exon_number "1";
4	StringTie	exon	101482332	101482459	1000	+	.	gene_id "MSTRG.18761"; transcript_id "MSTRG.18761.1"; exon_number "2";
4	StringTie	transcript	104393647	104395147	1000	+	.	gene_id "MSTRG.18797"; transcript_id "MSTRG.18797.1";
4	StringTie	exon	104393647	104393769	1000	+	.	gene_id "MSTRG.18797"; transcript_id "MSTRG.18797.1"; exon_number "1";
4	StringTie	exon	104394903	104395147	1000	+	.	gene_id "MSTRG.18797"; transcript_id "MSTRG.18797.1"; exon_number "2";
4	StringTie	transcript	107486284	107494033	1000	-	.	gene_id "MSTRG.18847"; transcript_id "MSTRG.18847.1";
4	StringTie	exon	107486284	107487010	1000	-	.	gene_id "MSTRG.18847"; transcript_id "MSTRG.18847.1"; exon_number "1";
4	StringTie	exon	107492355	107492516	1000	-	.	gene_id "MSTRG.18847"; transcript_id "MSTRG.18847.1"; exon_number "2";
4	StringTie	exon	107493808	107494033	1000	-	.	gene_id "MSTRG.18847"; transcript_id "MSTRG.18847.1"; exon_number "3";
4	StringTie	transcript	108782843	108783750	1000	+	.	gene_id "MSTRG.18853"; transcript_id "MSTRG.18853.1";
4	StringTie	exon	108782843	108783170	1000	+	.	gene_id "MSTRG.18853"; transcript_id "MSTRG.18853.1"; exon_number "1";
4	StringTie	exon	108783627	108783750	1000	+	.	gene_id "MSTRG.18853"; transcript_id "MSTRG.18853.1"; exon_number "2";
4	StringTie	transcript	110971582	110972547	1000	+	.	gene_id "MSTRG.18929"; transcript_id "MSTRG.18929.2";
4	StringTie	exon	110971582	110971740	1000	+	.	gene_id "MSTRG.18929"; transcript_id "MSTRG.18929.2"; exon_number "1";
4	StringTie	exon	110972381	110972547	1000	+	.	gene_id "MSTRG.18929"; transcript_id "MSTRG.18929.2"; exon_number "2";
4	StringTie	transcript	110972788	110974528	1000	+	.	gene_id "MSTRG.18929"; transcript_id "MSTRG.18929.4";
4	StringTie	exon	110972788	110973286	1000	+	.	gene_id "MSTRG.18929"; transcript_id "MSTRG.18929.4"; exon_number "1";
4	StringTie	exon	110973988	110974528	1000	+	.	gene_id "MSTRG.18929"; transcript_id "MSTRG.18929.4"; exon_number "2";
4	StringTie	transcript	111723288	111725027	1000	-	.	gene_id "MSTRG.18934"; transcript_id "MSTRG.18934.1";
4	StringTie	exon	111723288	111723593	1000	-	.	gene_id "MSTRG.18934"; transcript_id "MSTRG.18934.1"; exon_number "1";
4	StringTie	exon	111724605	111725027	1000	-	.	gene_id "MSTRG.18934"; transcript_id "MSTRG.18934.1"; exon_number "2";
4	StringTie	transcript	114944650	114960925	1000	-	.	gene_id "MSTRG.18947"; transcript_id "MSTRG.18947.1";
4	StringTie	exon	114944650	114948177	1000	-	.	gene_id "MSTRG.18947"; transcript_id "MSTRG.18947.1"; exon_number "1";
4	StringTie	exon	114960609	114960925	1000	-	.	gene_id "MSTRG.18947"; transcript_id "MSTRG.18947.1"; exon_number "2";
4	StringTie	transcript	117520860	117523382	1000	+	.	gene_id "MSTRG.18966"; transcript_id "MSTRG.18966.1";
4	StringTie	exon	117520860	117521026	1000	+	.	gene_id "MSTRG.18966"; transcript_id "MSTRG.18966.1"; exon_number "1";
4	StringTie	exon	117523172	117523382	1000	+	.	gene_id "MSTRG.18966"; transcript_id "MSTRG.18966.1"; exon_number "2";
4	StringTie	transcript	119804854	119918511	1000	-	.	gene_id "MSTRG.18991"; transcript_id "MSTRG.18991.1";
4	StringTie	exon	119804854	119806107	1000	-	.	gene_id "MSTRG.18991"; transcript_id "MSTRG.18991.1"; exon_number "1";
4	StringTie	exon	119840829	119840934	1000	-	.	gene_id "MSTRG.18991"; transcript_id "MSTRG.18991.1"; exon_number "2";
4	StringTie	exon	119918465	119918511	1000	-	.	gene_id "MSTRG.18991"; transcript_id "MSTRG.18991.1"; exon_number "3";
4	StringTie	transcript	119930993	119931332	1000	-	.	gene_id "MSTRG.18994"; transcript_id "MSTRG.18994.1";
4	StringTie	exon	119930993	119931076	1000	-	.	gene_id "MSTRG.18994"; transcript_id "MSTRG.18994.1"; exon_number "1";
4	StringTie	exon	119931172	119931332	1000	-	.	gene_id "MSTRG.18994"; transcript_id "MSTRG.18994.1"; exon_number "2";
4	StringTie	transcript	122801415	122802542	1000	-	.	gene_id "MSTRG.19028"; transcript_id "MSTRG.19028.1";
4	StringTie	exon	122801415	122801672	1000	-	.	gene_id "MSTRG.19028"; transcript_id "MSTRG.19028.1"; exon_number "1";
4	StringTie	exon	122802490	122802542	1000	-	.	gene_id "MSTRG.19028"; transcript_id "MSTRG.19028.1"; exon_number "2";
4	StringTie	transcript	130630896	130635857	1000	+	.	gene_id "MSTRG.19156"; transcript_id "MSTRG.19156.1";
4	StringTie	exon	130630896	130631114	1000	+	.	gene_id "MSTRG.19156"; transcript_id "MSTRG.19156.1"; exon_number "1";
4	StringTie	exon	130634832	130635857	1000	+	.	gene_id "MSTRG.19156"; transcript_id "MSTRG.19156.1"; exon_number "2";
4	StringTie	transcript	130630896	130635668	1000	+	.	gene_id "MSTRG.19156"; transcript_id "MSTRG.19156.2";
4	StringTie	exon	130630896	130631114	1000	+	.	gene_id "MSTRG.19156"; transcript_id "MSTRG.19156.2"; exon_number "1";
4	StringTie	exon	130634832	130635224	1000	+	.	gene_id "MSTRG.19156"; transcript_id "MSTRG.19156.2"; exon_number "2";
4	StringTie	exon	130635592	130635668	1000	+	.	gene_id "MSTRG.19156"; transcript_id "MSTRG.19156.2"; exon_number "3";
4	StringTie	transcript	130631122	130635668	1000	+	.	gene_id "MSTRG.19156"; transcript_id "MSTRG.19156.3";
4	StringTie	exon	130631122	130631195	1000	+	.	gene_id "MSTRG.19156"; transcript_id "MSTRG.19156.3"; exon_number "1";
4	StringTie	exon	130634832	130635668	1000	+	.	gene_id "MSTRG.19156"; transcript_id "MSTRG.19156.3"; exon_number "2";
4	StringTie	transcript	130687831	130701676	1000	-	.	gene_id "MSTRG.19165"; transcript_id "MSTRG.19165.2";
4	StringTie	exon	130687831	130688081	1000	-	.	gene_id "MSTRG.19165"; transcript_id "MSTRG.19165.2"; exon_number "1";
4	StringTie	exon	130689832	130690068	1000	-	.	gene_id "MSTRG.19165"; transcript_id "MSTRG.19165.2"; exon_number "2";
4	StringTie	exon	130701511	130701676	1000	-	.	gene_id "MSTRG.19165"; transcript_id "MSTRG.19165.2"; exon_number "3";
5	StringTie	transcript	3436615	3437375	1000	-	.	gene_id "MSTRG.19241"; transcript_id "MSTRG.19241.2";
5	StringTie	exon	3436615	3436804	1000	-	.	gene_id "MSTRG.19241"; transcript_id "MSTRG.19241.2"; exon_number "1";
5	StringTie	exon	3436918	3437375	1000	-	.	gene_id "MSTRG.19241"; transcript_id "MSTRG.19241.2"; exon_number "2";
5	StringTie	transcript	3441519	3454055	1000	-	.	gene_id "MSTRG.19245"; transcript_id "MSTRG.19245.1";
5	StringTie	exon	3441519	3442787	1000	-	.	gene_id "MSTRG.19245"; transcript_id "MSTRG.19245.1"; exon_number "1";
5	StringTie	exon	3453951	3454055	1000	-	.	gene_id "MSTRG.19245"; transcript_id "MSTRG.19245.1"; exon_number "2";
5	StringTie	transcript	3460322	3462244	1000	+	.	gene_id "MSTRG.19247"; transcript_id "MSTRG.19247.4";
5	StringTie	exon	3460322	3460646	1000	+	.	gene_id "MSTRG.19247"; transcript_id "MSTRG.19247.4"; exon_number "1";
5	StringTie	exon	3461630	3461768	1000	+	.	gene_id "MSTRG.19247"; transcript_id "MSTRG.19247.4"; exon_number "2";
5	StringTie	exon	3461979	3462244	1000	+	.	gene_id "MSTRG.19247"; transcript_id "MSTRG.19247.4"; exon_number "3";
5	StringTie	transcript	4900253	4905045	1000	+	.	gene_id "MSTRG.19279"; transcript_id "MSTRG.19279.1";
5	StringTie	exon	4900253	4900567	1000	+	.	gene_id "MSTRG.19279"; transcript_id "MSTRG.19279.1"; exon_number "1";
5	StringTie	exon	4904263	4905045	1000	+	.	gene_id "MSTRG.19279"; transcript_id "MSTRG.19279.1"; exon_number "2";
5	StringTie	transcript	7100346	7108690	1000	-	.	gene_id "MSTRG.19342"; transcript_id "MSTRG.19342.1";
5	StringTie	exon	7100346	7100502	1000	-	.	gene_id "MSTRG.19342"; transcript_id "MSTRG.19342.1"; exon_number "1";
5	StringTie	exon	7108576	7108690	1000	-	.	gene_id "MSTRG.19342"; transcript_id "MSTRG.19342.1"; exon_number "2";
5	StringTie	transcript	7402085	7454429	1000	-	.	gene_id "MSTRG.19353"; transcript_id "MSTRG.19353.1";
5	StringTie	exon	7402085	7402304	1000	-	.	gene_id "MSTRG.19353"; transcript_id "MSTRG.19353.1"; exon_number "1";
5	StringTie	exon	7445499	7445601	1000	-	.	gene_id "MSTRG.19353"; transcript_id "MSTRG.19353.1"; exon_number "2";
5	StringTie	exon	7454316	7454429	1000	-	.	gene_id "MSTRG.19353"; transcript_id "MSTRG.19353.1"; exon_number "3";
5	StringTie	transcript	8969259	8976223	1000	-	.	gene_id "MSTRG.19387"; transcript_id "MSTRG.19387.1";
5	StringTie	exon	8969259	8969735	1000	-	.	gene_id "MSTRG.19387"; transcript_id "MSTRG.19387.1"; exon_number "1";
5	StringTie	exon	8971985	8972147	1000	-	.	gene_id "MSTRG.19387"; transcript_id "MSTRG.19387.1"; exon_number "2";
5	StringTie	exon	8975770	8976223	1000	-	.	gene_id "MSTRG.19387"; transcript_id "MSTRG.19387.1"; exon_number "3";
5	StringTie	transcript	8969283	8973886	1000	-	.	gene_id "MSTRG.19387"; transcript_id "MSTRG.19387.2";
5	StringTie	exon	8969283	8969648	1000	-	.	gene_id "MSTRG.19387"; transcript_id "MSTRG.19387.2"; exon_number "1";
5	StringTie	exon	8973823	8973886	1000	-	.	gene_id "MSTRG.19387"; transcript_id "MSTRG.19387.2"; exon_number "2";
5	StringTie	transcript	8969286	8976223	1000	-	.	gene_id "MSTRG.19387"; transcript_id "MSTRG.19387.3";
5	StringTie	exon	8969286	8969735	1000	-	.	gene_id "MSTRG.19387"; transcript_id "MSTRG.19387.3"; exon_number "1";
5	StringTie	exon	8975770	8976223	1000	-	.	gene_id "MSTRG.19387"; transcript_id "MSTRG.19387.3"; exon_number "2";
5	StringTie	transcript	9042027	9054104	1000	-	.	gene_id "MSTRG.19393"; transcript_id "MSTRG.19393.1";
5	StringTie	exon	9042027	9042377	1000	-	.	gene_id "MSTRG.19393"; transcript_id "MSTRG.19393.1"; exon_number "1";
5	StringTie	exon	9052962	9053211	1000	-	.	gene_id "MSTRG.19393"; transcript_id "MSTRG.19393.1"; exon_number "2";
5	StringTie	exon	9053994	9054104	1000	-	.	gene_id "MSTRG.19393"; transcript_id "MSTRG.19393.1"; exon_number "3";
5	StringTie	transcript	9141853	9169821	1000	+	.	gene_id "MSTRG.19399"; transcript_id "MSTRG.19399.1";
5	StringTie	exon	9141853	9142115	1000	+	.	gene_id "MSTRG.19399"; transcript_id "MSTRG.19399.1"; exon_number "1";
5	StringTie	exon	9148431	9148512	1000	+	.	gene_id "MSTRG.19399"; transcript_id "MSTRG.19399.1"; exon_number "2";
5	StringTie	exon	9169498	9169821	1000	+	.	gene_id "MSTRG.19399"; transcript_id "MSTRG.19399.1"; exon_number "3";
5	StringTie	transcript	10994216	10998526	1000	+	.	gene_id "MSTRG.19499"; transcript_id "MSTRG.19499.2";
5	StringTie	exon	10994216	10994627	1000	+	.	gene_id "MSTRG.19499"; transcript_id "MSTRG.19499.2"; exon_number "1";
5	StringTie	exon	10998475	10998526	1000	+	.	gene_id "MSTRG.19499"; transcript_id "MSTRG.19499.2"; exon_number "2";
5	StringTie	transcript	11955441	11959719	1000	+	.	gene_id "MSTRG.19510"; transcript_id "MSTRG.19510.1";
5	StringTie	exon	11955441	11955553	1000	+	.	gene_id "MSTRG.19510"; transcript_id "MSTRG.19510.1"; exon_number "1";
5	StringTie	exon	11959555	11959719	1000	+	.	gene_id "MSTRG.19510"; transcript_id "MSTRG.19510.1"; exon_number "2";
5	StringTie	transcript	12251136	12256048	1000	-	.	gene_id "MSTRG.19513"; transcript_id "MSTRG.19513.1";
5	StringTie	exon	12251136	12251638	1000	-	.	gene_id "MSTRG.19513"; transcript_id "MSTRG.19513.1"; exon_number "1";
5	StringTie	exon	12256012	12256048	1000	-	.	gene_id "MSTRG.19513"; transcript_id "MSTRG.19513.1"; exon_number "2";
5	StringTie	transcript	12396300	12400188	1000	-	.	gene_id "MSTRG.19515"; transcript_id "MSTRG.19515.1";
5	StringTie	exon	12396300	12396604	1000	-	.	gene_id "MSTRG.19515"; transcript_id "MSTRG.19515.1"; exon_number "1";
5	StringTie	exon	12398964	12399127	1000	-	.	gene_id "MSTRG.19515"; transcript_id "MSTRG.19515.1"; exon_number "2";
5	StringTie	exon	12400012	12400188	1000	-	.	gene_id "MSTRG.19515"; transcript_id "MSTRG.19515.1"; exon_number "3";
5	StringTie	transcript	13402060	13429344	1000	+	.	gene_id "MSTRG.19532"; transcript_id "MSTRG.19532.1";
5	StringTie	exon	13402060	13402179	1000	+	.	gene_id "MSTRG.19532"; transcript_id "MSTRG.19532.1"; exon_number "1";
5	StringTie	exon	13404905	13404977	1000	+	.	gene_id "MSTRG.19532"; transcript_id "MSTRG.19532.1"; exon_number "2";
5	StringTie	exon	13429209	13429344	1000	+	.	gene_id "MSTRG.19532"; transcript_id "MSTRG.19532.1"; exon_number "3";
5	StringTie	transcript	14056675	14061330	1000	-	.	gene_id "MSTRG.19536"; transcript_id "MSTRG.19536.1";
5	StringTie	exon	14056675	14057321	1000	-	.	gene_id "MSTRG.19536"; transcript_id "MSTRG.19536.1"; exon_number "1";
5	StringTie	exon	14059391	14059530	1000	-	.	gene_id "MSTRG.19536"; transcript_id "MSTRG.19536.1"; exon_number "2";
5	StringTie	exon	14061205	14061330	1000	-	.	gene_id "MSTRG.19536"; transcript_id "MSTRG.19536.1"; exon_number "3";
5	StringTie	transcript	14058747	14067978	1000	-	.	gene_id "MSTRG.19536"; transcript_id "MSTRG.19536.2";
5	StringTie	exon	14058747	14059530	1000	-	.	gene_id "MSTRG.19536"; transcript_id "MSTRG.19536.2"; exon_number "1";
5	StringTie	exon	14061205	14062357	1000	-	.	gene_id "MSTRG.19536"; transcript_id "MSTRG.19536.2"; exon_number "2";
5	StringTie	exon	14067842	14067978	1000	-	.	gene_id "MSTRG.19536"; transcript_id "MSTRG.19536.2"; exon_number "3";
5	StringTie	transcript	18586721	18588093	1000	-	.	gene_id "MSTRG.19660"; transcript_id "MSTRG.19660.1";
5	StringTie	exon	18586721	18587424	1000	-	.	gene_id "MSTRG.19660"; transcript_id "MSTRG.19660.1"; exon_number "1";
5	StringTie	exon	18587828	18588093	1000	-	.	gene_id "MSTRG.19660"; transcript_id "MSTRG.19660.1"; exon_number "2";
5	StringTie	transcript	19211090	19212924	1000	-	.	gene_id "MSTRG.19689"; transcript_id "MSTRG.19689.1";
5	StringTie	exon	19211090	19212053	1000	-	.	gene_id "MSTRG.19689"; transcript_id "MSTRG.19689.1"; exon_number "1";
5	StringTie	exon	19212489	19212924	1000	-	.	gene_id "MSTRG.19689"; transcript_id "MSTRG.19689.1"; exon_number "2";
5	StringTie	transcript	19211623	19212422	1000	-	.	gene_id "MSTRG.19689"; transcript_id "MSTRG.19689.2";
5	StringTie	exon	19211623	19212053	1000	-	.	gene_id "MSTRG.19689"; transcript_id "MSTRG.19689.2"; exon_number "1";
5	StringTie	exon	19212357	19212422	1000	-	.	gene_id "MSTRG.19689"; transcript_id "MSTRG.19689.2"; exon_number "2";
5	StringTie	transcript	19217961	19222057	1000	-	.	gene_id "MSTRG.19693"; transcript_id "MSTRG.19693.2";
5	StringTie	exon	19217961	19218867	1000	-	.	gene_id "MSTRG.19693"; transcript_id "MSTRG.19693.2"; exon_number "1";
5	StringTie	exon	19219285	19219383	1000	-	.	gene_id "MSTRG.19693"; transcript_id "MSTRG.19693.2"; exon_number "2";
5	StringTie	exon	19219475	19222057	1000	-	.	gene_id "MSTRG.19693"; transcript_id "MSTRG.19693.2"; exon_number "3";
5	StringTie	transcript	19217964	19222050	1000	-	.	gene_id "MSTRG.19693"; transcript_id "MSTRG.19693.3";
5	StringTie	exon	19217964	19218867	1000	-	.	gene_id "MSTRG.19693"; transcript_id "MSTRG.19693.3"; exon_number "1";
5	StringTie	exon	19219285	19222050	1000	-	.	gene_id "MSTRG.19693"; transcript_id "MSTRG.19693.3"; exon_number "2";
5	StringTie	transcript	19217964	19221707	1000	-	.	gene_id "MSTRG.19693"; transcript_id "MSTRG.19693.4";
5	StringTie	exon	19217964	19218840	1000	-	.	gene_id "MSTRG.19693"; transcript_id "MSTRG.19693.4"; exon_number "1";
5	StringTie	exon	19219285	19219383	1000	-	.	gene_id "MSTRG.19693"; transcript_id "MSTRG.19693.4"; exon_number "2";
5	StringTie	exon	19219475	19221707	1000	-	.	gene_id "MSTRG.19693"; transcript_id "MSTRG.19693.4"; exon_number "3";
5	StringTie	transcript	19344546	19350357	1000	+	.	gene_id "MSTRG.19703"; transcript_id "MSTRG.19703.1";
5	StringTie	exon	19344546	19344975	1000	+	.	gene_id "MSTRG.19703"; transcript_id "MSTRG.19703.1"; exon_number "1";
5	StringTie	exon	19350038	19350357	1000	+	.	gene_id "MSTRG.19703"; transcript_id "MSTRG.19703.1"; exon_number "2";
5	StringTie	transcript	19278336	19280920	1000	-	.	gene_id "MSTRG.19704"; transcript_id "MSTRG.19704.1";
5	StringTie	exon	19278336	19278788	1000	-	.	gene_id "MSTRG.19704"; transcript_id "MSTRG.19704.1"; exon_number "1";
5	StringTie	exon	19279529	19280920	1000	-	.	gene_id "MSTRG.19704"; transcript_id "MSTRG.19704.1"; exon_number "2";
5	StringTie	transcript	19816687	19837833	1000	-	.	gene_id "MSTRG.19713"; transcript_id "MSTRG.19713.1";
5	StringTie	exon	19816687	19818458	1000	-	.	gene_id "MSTRG.19713"; transcript_id "MSTRG.19713.1"; exon_number "1";
5	StringTie	exon	19836468	19837833	1000	-	.	gene_id "MSTRG.19713"; transcript_id "MSTRG.19713.1"; exon_number "2";
5	StringTie	transcript	34376603	34426211	1000	-	.	gene_id "MSTRG.19949"; transcript_id "MSTRG.19949.6";
5	StringTie	exon	34376603	34376738	1000	-	.	gene_id "MSTRG.19949"; transcript_id "MSTRG.19949.6"; exon_number "1";
5	StringTie	exon	34425240	34425331	1000	-	.	gene_id "MSTRG.19949"; transcript_id "MSTRG.19949.6"; exon_number "2";
5	StringTie	exon	34426141	34426211	1000	-	.	gene_id "MSTRG.19949"; transcript_id "MSTRG.19949.6"; exon_number "3";
5	StringTie	transcript	42299652	42314212	1000	+	.	gene_id "MSTRG.19998"; transcript_id "MSTRG.19998.1";
5	StringTie	exon	42299652	42300030	1000	+	.	gene_id "MSTRG.19998"; transcript_id "MSTRG.19998.1"; exon_number "1";
5	StringTie	exon	42308951	42309037	1000	+	.	gene_id "MSTRG.19998"; transcript_id "MSTRG.19998.1"; exon_number "2";
5	StringTie	exon	42313674	42314212	1000	+	.	gene_id "MSTRG.19998"; transcript_id "MSTRG.19998.1"; exon_number "3";
5	StringTie	transcript	42299758	42314010	1000	+	.	gene_id "MSTRG.19998"; transcript_id "MSTRG.19998.2";
5	StringTie	exon	42299758	42299923	1000	+	.	gene_id "MSTRG.19998"; transcript_id "MSTRG.19998.2"; exon_number "1";
5	StringTie	exon	42313674	42314010	1000	+	.	gene_id "MSTRG.19998"; transcript_id "MSTRG.19998.2"; exon_number "2";
5	StringTie	transcript	49345754	49504592	1000	+	.	gene_id "MSTRG.20066"; transcript_id "MSTRG.20066.1";
5	StringTie	exon	49345754	49345832	1000	+	.	gene_id "MSTRG.20066"; transcript_id "MSTRG.20066.1"; exon_number "1";
5	StringTie	exon	49435804	49435889	1000	+	.	gene_id "MSTRG.20066"; transcript_id "MSTRG.20066.1"; exon_number "2";
5	StringTie	exon	49504551	49504592	1000	+	.	gene_id "MSTRG.20066"; transcript_id "MSTRG.20066.1"; exon_number "3";
5	StringTie	transcript	65160902	65171718	1000	+	.	gene_id "MSTRG.20288"; transcript_id "MSTRG.20288.1";
5	StringTie	exon	65160902	65161053	1000	+	.	gene_id "MSTRG.20288"; transcript_id "MSTRG.20288.1"; exon_number "1";
5	StringTie	exon	65171419	65171718	1000	+	.	gene_id "MSTRG.20288"; transcript_id "MSTRG.20288.1"; exon_number "2";
5	StringTie	transcript	67861881	67863326	1000	-	.	gene_id "MSTRG.20340"; transcript_id "MSTRG.20340.1";
5	StringTie	exon	67861881	67862093	1000	-	.	gene_id "MSTRG.20340"; transcript_id "MSTRG.20340.1"; exon_number "1";
5	StringTie	exon	67863269	67863326	1000	-	.	gene_id "MSTRG.20340"; transcript_id "MSTRG.20340.1"; exon_number "2";
5	StringTie	transcript	67917720	67925079	1000	+	.	gene_id "MSTRG.20343"; transcript_id "MSTRG.20343.1";
5	StringTie	exon	67917720	67918234	1000	+	.	gene_id "MSTRG.20343"; transcript_id "MSTRG.20343.1"; exon_number "1";
5	StringTie	exon	67918732	67918874	1000	+	.	gene_id "MSTRG.20343"; transcript_id "MSTRG.20343.1"; exon_number "2";
5	StringTie	exon	67924959	67925079	1000	+	.	gene_id "MSTRG.20343"; transcript_id "MSTRG.20343.1"; exon_number "3";
5	StringTie	transcript	74045524	74105732	1000	+	.	gene_id "MSTRG.20406"; transcript_id "MSTRG.20406.1";
5	StringTie	exon	74045524	74045698	1000	+	.	gene_id "MSTRG.20406"; transcript_id "MSTRG.20406.1"; exon_number "1";
5	StringTie	exon	74105690	74105732	1000	+	.	gene_id "MSTRG.20406"; transcript_id "MSTRG.20406.1"; exon_number "2";
5	StringTie	transcript	77521200	77525183	1000	+	.	gene_id "MSTRG.20431"; transcript_id "MSTRG.20431.1";
5	StringTie	exon	77521200	77521296	1000	+	.	gene_id "MSTRG.20431"; transcript_id "MSTRG.20431.1"; exon_number "1";
5	StringTie	exon	77524776	77525183	1000	+	.	gene_id "MSTRG.20431"; transcript_id "MSTRG.20431.1"; exon_number "2";
5	StringTie	transcript	77933963	77936360	1000	-	.	gene_id "MSTRG.20445"; transcript_id "MSTRG.20445.3";
5	StringTie	exon	77933963	77936047	1000	-	.	gene_id "MSTRG.20445"; transcript_id "MSTRG.20445.3"; exon_number "1";
5	StringTie	exon	77936261	77936360	1000	-	.	gene_id "MSTRG.20445"; transcript_id "MSTRG.20445.3"; exon_number "2";
5	StringTie	transcript	82259501	82264807	1000	+	.	gene_id "MSTRG.20520"; transcript_id "MSTRG.20520.1";
5	StringTie	exon	82259501	82259550	1000	+	.	gene_id "MSTRG.20520"; transcript_id "MSTRG.20520.1"; exon_number "1";
5	StringTie	exon	82264638	82264807	1000	+	.	gene_id "MSTRG.20520"; transcript_id "MSTRG.20520.1"; exon_number "2";
5	StringTie	transcript	82282232	82283724	1000	+	.	gene_id "MSTRG.20521"; transcript_id "MSTRG.20521.1";
5	StringTie	exon	82282232	82282347	1000	+	.	gene_id "MSTRG.20521"; transcript_id "MSTRG.20521.1"; exon_number "1";
5	StringTie	exon	82283515	82283724	1000	+	.	gene_id "MSTRG.20521"; transcript_id "MSTRG.20521.1"; exon_number "2";
5	StringTie	transcript	82338488	82355883	1000	+	.	gene_id "MSTRG.20524"; transcript_id "MSTRG.20524.1";
5	StringTie	exon	82338488	82338735	1000	+	.	gene_id "MSTRG.20524"; transcript_id "MSTRG.20524.1"; exon_number "1";
5	StringTie	exon	82339093	82339238	1000	+	.	gene_id "MSTRG.20524"; transcript_id "MSTRG.20524.1"; exon_number "2";
5	StringTie	exon	82353246	82355883	1000	+	.	gene_id "MSTRG.20524"; transcript_id "MSTRG.20524.1"; exon_number "3";
5	StringTie	transcript	82338488	82355552	1000	+	.	gene_id "MSTRG.20524"; transcript_id "MSTRG.20524.2";
5	StringTie	exon	82338488	82338735	1000	+	.	gene_id "MSTRG.20524"; transcript_id "MSTRG.20524.2"; exon_number "1";
5	StringTie	exon	82339093	82339238	1000	+	.	gene_id "MSTRG.20524"; transcript_id "MSTRG.20524.2"; exon_number "2";
5	StringTie	exon	82341126	82342166	1000	+	.	gene_id "MSTRG.20524"; transcript_id "MSTRG.20524.2"; exon_number "3";
5	StringTie	exon	82353246	82355552	1000	+	.	gene_id "MSTRG.20524"; transcript_id "MSTRG.20524.2"; exon_number "4";
5	StringTie	transcript	85357922	85420101	1000	+	.	gene_id "MSTRG.20552"; transcript_id "MSTRG.20552.1";
5	StringTie	exon	85357922	85358040	1000	+	.	gene_id "MSTRG.20552"; transcript_id "MSTRG.20552.1"; exon_number "1";
5	StringTie	exon	85359453	85359564	1000	+	.	gene_id "MSTRG.20552"; transcript_id "MSTRG.20552.1"; exon_number "2";
5	StringTie	exon	85420042	85420101	1000	+	.	gene_id "MSTRG.20552"; transcript_id "MSTRG.20552.1"; exon_number "3";
5	StringTie	transcript	88415389	88424770	1000	-	.	gene_id "MSTRG.20586"; transcript_id "MSTRG.20586.1";
5	StringTie	exon	88415389	88419677	1000	-	.	gene_id "MSTRG.20586"; transcript_id "MSTRG.20586.1"; exon_number "1";
5	StringTie	exon	88424475	88424770	1000	-	.	gene_id "MSTRG.20586"; transcript_id "MSTRG.20586.1"; exon_number "2";
5	StringTie	transcript	89728511	89884182	1000	+	.	gene_id "MSTRG.20612"; transcript_id "MSTRG.20612.1";
5	StringTie	exon	89728511	89728697	1000	+	.	gene_id "MSTRG.20612"; transcript_id "MSTRG.20612.1"; exon_number "1";
5	StringTie	exon	89746204	89746331	1000	+	.	gene_id "MSTRG.20612"; transcript_id "MSTRG.20612.1"; exon_number "2";
5	StringTie	exon	89884161	89884182	1000	+	.	gene_id "MSTRG.20612"; transcript_id "MSTRG.20612.1"; exon_number "3";
5	StringTie	transcript	90686897	90690823	1000	-	.	gene_id "MSTRG.20625"; transcript_id "MSTRG.20625.1";
5	StringTie	exon	90686897	90687069	1000	-	.	gene_id "MSTRG.20625"; transcript_id "MSTRG.20625.1"; exon_number "1";
5	StringTie	exon	90690775	90690823	1000	-	.	gene_id "MSTRG.20625"; transcript_id "MSTRG.20625.1"; exon_number "2";
5	StringTie	transcript	93252074	93253650	1000	-	.	gene_id "MSTRG.20653"; transcript_id "MSTRG.20653.7";
5	StringTie	exon	93252074	93252377	1000	-	.	gene_id "MSTRG.20653"; transcript_id "MSTRG.20653.7"; exon_number "1";
5	StringTie	exon	93252415	93253650	1000	-	.	gene_id "MSTRG.20653"; transcript_id "MSTRG.20653.7"; exon_number "2";
5	StringTie	transcript	103974255	103974930	1000	+	.	gene_id "MSTRG.20693"; transcript_id "MSTRG.20693.1";
5	StringTie	exon	103974255	103974305	1000	+	.	gene_id "MSTRG.20693"; transcript_id "MSTRG.20693.1"; exon_number "1";
5	StringTie	exon	103974703	103974930	1000	+	.	gene_id "MSTRG.20693"; transcript_id "MSTRG.20693.1"; exon_number "2";
6	StringTie	transcript	1361827	1406219	1000	-	.	gene_id "MSTRG.20757"; transcript_id "MSTRG.20757.1";
6	StringTie	exon	1361827	1361876	1000	-	.	gene_id "MSTRG.20757"; transcript_id "MSTRG.20757.1"; exon_number "1";
6	StringTie	exon	1405881	1406219	1000	-	.	gene_id "MSTRG.20757"; transcript_id "MSTRG.20757.1"; exon_number "2";
6	StringTie	transcript	1583469	1584642	1000	-	.	gene_id "MSTRG.20761"; transcript_id "MSTRG.20761.1";
6	StringTie	exon	1583469	1584507	1000	-	.	gene_id "MSTRG.20761"; transcript_id "MSTRG.20761.1"; exon_number "1";
6	StringTie	exon	1584604	1584642	1000	-	.	gene_id "MSTRG.20761"; transcript_id "MSTRG.20761.1"; exon_number "2";
6	StringTie	transcript	1488991	1494886	1000	-	.	gene_id "MSTRG.20780"; transcript_id "MSTRG.20780.15";
6	StringTie	exon	1488991	1489665	1000	-	.	gene_id "MSTRG.20780"; transcript_id "MSTRG.20780.15"; exon_number "1";
6	StringTie	exon	1490054	1490212	1000	-	.	gene_id "MSTRG.20780"; transcript_id "MSTRG.20780.15"; exon_number "2";
6	StringTie	exon	1494637	1494886	1000	-	.	gene_id "MSTRG.20780"; transcript_id "MSTRG.20780.15"; exon_number "3";
6	StringTie	transcript	1489062	1494848	1000	-	.	gene_id "MSTRG.20780"; transcript_id "MSTRG.20780.16";
6	StringTie	exon	1489062	1490212	1000	-	.	gene_id "MSTRG.20780"; transcript_id "MSTRG.20780.16"; exon_number "1";
6	StringTie	exon	1494252	1494848	1000	-	.	gene_id "MSTRG.20780"; transcript_id "MSTRG.20780.16"; exon_number "2";
6	StringTie	transcript	1489270	1494866	1000	-	.	gene_id "MSTRG.20780"; transcript_id "MSTRG.20780.17";
6	StringTie	exon	1489270	1492696	1000	-	.	gene_id "MSTRG.20780"; transcript_id "MSTRG.20780.17"; exon_number "1";
6	StringTie	exon	1494637	1494866	1000	-	.	gene_id "MSTRG.20780"; transcript_id "MSTRG.20780.17"; exon_number "2";
6	StringTie	transcript	1489361	1494690	1000	-	.	gene_id "MSTRG.20780"; transcript_id "MSTRG.20780.19";
6	StringTie	exon	1489361	1489665	1000	-	.	gene_id "MSTRG.20780"; transcript_id "MSTRG.20780.19"; exon_number "1";
6	StringTie	exon	1494637	1494690	1000	-	.	gene_id "MSTRG.20780"; transcript_id "MSTRG.20780.19"; exon_number "2";
6	StringTie	transcript	1489397	1495456	1000	-	.	gene_id "MSTRG.20780"; transcript_id "MSTRG.20780.20";
6	StringTie	exon	1489397	1489665	1000	-	.	gene_id "MSTRG.20780"; transcript_id "MSTRG.20780.20"; exon_number "1";
6	StringTie	exon	1495404	1495456	1000	-	.	gene_id "MSTRG.20780"; transcript_id "MSTRG.20780.20"; exon_number "2";
6	StringTie	transcript	9326032	9328762	1000	+	.	gene_id "MSTRG.20901"; transcript_id "MSTRG.20901.1";
6	StringTie	exon	9326032	9326165	1000	+	.	gene_id "MSTRG.20901"; transcript_id "MSTRG.20901.1"; exon_number "1";
6	StringTie	exon	9326366	9326491	1000	+	.	gene_id "MSTRG.20901"; transcript_id "MSTRG.20901.1"; exon_number "2";
6	StringTie	exon	9326793	9326898	1000	+	.	gene_id "MSTRG.20901"; transcript_id "MSTRG.20901.1"; exon_number "3";
6	StringTie	exon	9327624	9328762	1000	+	.	gene_id "MSTRG.20901"; transcript_id "MSTRG.20901.1"; exon_number "4";
6	StringTie	transcript	8464426	8467704	1000	-	.	gene_id "MSTRG.20903"; transcript_id "MSTRG.20903.2";
6	StringTie	exon	8464426	8466748	1000	-	.	gene_id "MSTRG.20903"; transcript_id "MSTRG.20903.2"; exon_number "1";
6	StringTie	exon	8467681	8467704	1000	-	.	gene_id "MSTRG.20903"; transcript_id "MSTRG.20903.2"; exon_number "2";
6	StringTie	transcript	9043927	9047267	1000	+	.	gene_id "MSTRG.20909"; transcript_id "MSTRG.20909.1";
6	StringTie	exon	9043927	9044107	1000	+	.	gene_id "MSTRG.20909"; transcript_id "MSTRG.20909.1"; exon_number "1";
6	StringTie	exon	9046545	9047267	1000	+	.	gene_id "MSTRG.20909"; transcript_id "MSTRG.20909.1"; exon_number "2";
6	StringTie	transcript	10725667	10753095	1000	+	.	gene_id "MSTRG.20921"; transcript_id "MSTRG.20921.1";
6	StringTie	exon	10725667	10725715	1000	+	.	gene_id "MSTRG.20921"; transcript_id "MSTRG.20921.1"; exon_number "1";
6	StringTie	exon	10745569	10745702	1000	+	.	gene_id "MSTRG.20921"; transcript_id "MSTRG.20921.1"; exon_number "2";
6	StringTie	exon	10753023	10753095	1000	+	.	gene_id "MSTRG.20921"; transcript_id "MSTRG.20921.1"; exon_number "3";
6	StringTie	transcript	10725690	10753137	1000	+	.	gene_id "MSTRG.20921"; transcript_id "MSTRG.20921.2";
6	StringTie	exon	10725690	10726020	1000	+	.	gene_id "MSTRG.20921"; transcript_id "MSTRG.20921.2"; exon_number "1";
6	StringTie	exon	10745569	10745702	1000	+	.	gene_id "MSTRG.20921"; transcript_id "MSTRG.20921.2"; exon_number "2";
6	StringTie	exon	10753023	10753137	1000	+	.	gene_id "MSTRG.20921"; transcript_id "MSTRG.20921.2"; exon_number "3";
6	StringTie	transcript	10736850	10753095	1000	+	.	gene_id "MSTRG.20921"; transcript_id "MSTRG.20921.3";
6	StringTie	exon	10736850	10736878	1000	+	.	gene_id "MSTRG.20921"; transcript_id "MSTRG.20921.3"; exon_number "1";
6	StringTie	exon	10745569	10745702	1000	+	.	gene_id "MSTRG.20921"; transcript_id "MSTRG.20921.3"; exon_number "2";
6	StringTie	exon	10753023	10753095	1000	+	.	gene_id "MSTRG.20921"; transcript_id "MSTRG.20921.3"; exon_number "3";
6	StringTie	transcript	13389886	13400824	1000	-	.	gene_id "MSTRG.20982"; transcript_id "MSTRG.20982.1";
6	StringTie	exon	13389886	13391673	1000	-	.	gene_id "MSTRG.20982"; transcript_id "MSTRG.20982.1"; exon_number "1";
6	StringTie	exon	13394304	13394542	1000	-	.	gene_id "MSTRG.20982"; transcript_id "MSTRG.20982.1"; exon_number "2";
6	StringTie	exon	13400130	13400323	1000	-	.	gene_id "MSTRG.20982"; transcript_id "MSTRG.20982.1"; exon_number "3";
6	StringTie	exon	13400516	13400824	1000	-	.	gene_id "MSTRG.20982"; transcript_id "MSTRG.20982.1"; exon_number "4";
6	StringTie	transcript	13389961	13400203	1000	-	.	gene_id "MSTRG.20982"; transcript_id "MSTRG.20982.2";
6	StringTie	exon	13389961	13390870	1000	-	.	gene_id "MSTRG.20982"; transcript_id "MSTRG.20982.2"; exon_number "1";
6	StringTie	exon	13391513	13391673	1000	-	.	gene_id "MSTRG.20982"; transcript_id "MSTRG.20982.2"; exon_number "2";
6	StringTie	exon	13394304	13394542	1000	-	.	gene_id "MSTRG.20982"; transcript_id "MSTRG.20982.2"; exon_number "3";
6	StringTie	exon	13400130	13400203	1000	-	.	gene_id "MSTRG.20982"; transcript_id "MSTRG.20982.2"; exon_number "4";
6	StringTie	transcript	18336235	18522423	1000	-	.	gene_id "MSTRG.21027"; transcript_id "MSTRG.21027.1";
6	StringTie	exon	18336235	18338424	1000	-	.	gene_id "MSTRG.21027"; transcript_id "MSTRG.21027.1"; exon_number "1";
6	StringTie	exon	18522390	18522423	1000	-	.	gene_id "MSTRG.21027"; transcript_id "MSTRG.21027.1"; exon_number "2";
6	StringTie	transcript	19433973	19434964	1000	-	.	gene_id "MSTRG.21058"; transcript_id "MSTRG.21058.1";
6	StringTie	exon	19433973	19434029	1000	-	.	gene_id "MSTRG.21058"; transcript_id "MSTRG.21058.1"; exon_number "1";
6	StringTie	exon	19434818	19434964	1000	-	.	gene_id "MSTRG.21058"; transcript_id "MSTRG.21058.1"; exon_number "2";
6	StringTie	transcript	19700765	19704401	1000	+	.	gene_id "MSTRG.21071"; transcript_id "MSTRG.21071.1";
6	StringTie	exon	19700765	19700886	1000	+	.	gene_id "MSTRG.21071"; transcript_id "MSTRG.21071.1"; exon_number "1";
6	StringTie	exon	19703218	19704401	1000	+	.	gene_id "MSTRG.21071"; transcript_id "MSTRG.21071.1"; exon_number "2";
6	StringTie	transcript	25939453	26177143	1000	+	.	gene_id "MSTRG.21084"; transcript_id "MSTRG.21084.1";
6	StringTie	exon	25939453	25939508	1000	+	.	gene_id "MSTRG.21084"; transcript_id "MSTRG.21084.1"; exon_number "1";
6	StringTie	exon	25940578	25940664	1000	+	.	gene_id "MSTRG.21084"; transcript_id "MSTRG.21084.1"; exon_number "2";
6	StringTie	exon	26176949	26177143	1000	+	.	gene_id "MSTRG.21084"; transcript_id "MSTRG.21084.1"; exon_number "3";
6	StringTie	transcript	26570398	26583047	1000	+	.	gene_id "MSTRG.21085"; transcript_id "MSTRG.21085.1";
6	StringTie	exon	26570398	26570636	1000	+	.	gene_id "MSTRG.21085"; transcript_id "MSTRG.21085.1"; exon_number "1";
6	StringTie	exon	26571711	26571769	1000	+	.	gene_id "MSTRG.21085"; transcript_id "MSTRG.21085.1"; exon_number "2";
6	StringTie	exon	26578036	26583047	1000	+	.	gene_id "MSTRG.21085"; transcript_id "MSTRG.21085.1"; exon_number "3";
6	StringTie	transcript	30148814	30156085	1000	-	.	gene_id "MSTRG.21165"; transcript_id "MSTRG.21165.1";
6	StringTie	exon	30148814	30150289	1000	-	.	gene_id "MSTRG.21165"; transcript_id "MSTRG.21165.1"; exon_number "1";
6	StringTie	exon	30155851	30156085	1000	-	.	gene_id "MSTRG.21165"; transcript_id "MSTRG.21165.1"; exon_number "2";
6	StringTie	transcript	30522074	30558441	1000	+	.	gene_id "MSTRG.21167"; transcript_id "MSTRG.21167.1";
6	StringTie	exon	30522074	30522111	1000	+	.	gene_id "MSTRG.21167"; transcript_id "MSTRG.21167.1"; exon_number "1";
6	StringTie	exon	30531892	30532031	1000	+	.	gene_id "MSTRG.21167"; transcript_id "MSTRG.21167.1"; exon_number "2";
6	StringTie	exon	30533886	30533990	1000	+	.	gene_id "MSTRG.21167"; transcript_id "MSTRG.21167.1"; exon_number "3";
6	StringTie	exon	30558331	30558441	1000	+	.	gene_id "MSTRG.21167"; transcript_id "MSTRG.21167.1"; exon_number "4";
6	StringTie	transcript	40779808	40780951	1000	-	.	gene_id "MSTRG.21250"; transcript_id "MSTRG.21250.1";
6	StringTie	exon	40779808	40780394	1000	-	.	gene_id "MSTRG.21250"; transcript_id "MSTRG.21250.1"; exon_number "1";
6	StringTie	exon	40780525	40780951	1000	-	.	gene_id "MSTRG.21250"; transcript_id "MSTRG.21250.1"; exon_number "2";
6	StringTie	transcript	41660099	41667013	1000	-	.	gene_id "MSTRG.21260"; transcript_id "MSTRG.21260.1";
6	StringTie	exon	41660099	41660154	1000	-	.	gene_id "MSTRG.21260"; transcript_id "MSTRG.21260.1"; exon_number "1";
6	StringTie	exon	41660450	41660602	1000	-	.	gene_id "MSTRG.21260"; transcript_id "MSTRG.21260.1"; exon_number "2";
6	StringTie	exon	41666951	41667013	1000	-	.	gene_id "MSTRG.21260"; transcript_id "MSTRG.21260.1"; exon_number "3";
6	StringTie	transcript	41972795	41974488	1000	-	.	gene_id "MSTRG.21263"; transcript_id "MSTRG.21263.1";
6	StringTie	exon	41972795	41973208	1000	-	.	gene_id "MSTRG.21263"; transcript_id "MSTRG.21263.1"; exon_number "1";
6	StringTie	exon	41974371	41974488	1000	-	.	gene_id "MSTRG.21263"; transcript_id "MSTRG.21263.1"; exon_number "2";
6	StringTie	transcript	43086286	43087645	1000	+	.	gene_id "MSTRG.21279"; transcript_id "MSTRG.21279.2";
6	StringTie	exon	43086286	43086398	1000	+	.	gene_id "MSTRG.21279"; transcript_id "MSTRG.21279.2"; exon_number "1";
6	StringTie	exon	43086869	43087645	1000	+	.	gene_id "MSTRG.21279"; transcript_id "MSTRG.21279.2"; exon_number "2";
6	StringTie	transcript	43503850	43509913	1000	+	.	gene_id "MSTRG.21291"; transcript_id "MSTRG.21291.1";
6	StringTie	exon	43503850	43504102	1000	+	.	gene_id "MSTRG.21291"; transcript_id "MSTRG.21291.1"; exon_number "1";
6	StringTie	exon	43506763	43506820	1000	+	.	gene_id "MSTRG.21291"; transcript_id "MSTRG.21291.1"; exon_number "2";
6	StringTie	exon	43508832	43509913	1000	+	.	gene_id "MSTRG.21291"; transcript_id "MSTRG.21291.1"; exon_number "3";
6	StringTie	transcript	43505998	43509867	1000	+	.	gene_id "MSTRG.21291"; transcript_id "MSTRG.21291.2";
6	StringTie	exon	43505998	43506581	1000	+	.	gene_id "MSTRG.21291"; transcript_id "MSTRG.21291.2"; exon_number "1";
6	StringTie	exon	43506763	43506820	1000	+	.	gene_id "MSTRG.21291"; transcript_id "MSTRG.21291.2"; exon_number "2";
6	StringTie	exon	43508832	43509867	1000	+	.	gene_id "MSTRG.21291"; transcript_id "MSTRG.21291.2"; exon_number "3";
6	StringTie	transcript	43573096	43577796	1000	-	.	gene_id "MSTRG.21301"; transcript_id "MSTRG.21301.1";
6	StringTie	exon	43573096	43573868	1000	-	.	gene_id "MSTRG.21301"; transcript_id "MSTRG.21301.1"; exon_number "1";
6	StringTie	exon	43577641	43577796	1000	-	.	gene_id "MSTRG.21301"; transcript_id "MSTRG.21301.1"; exon_number "2";
6	StringTie	transcript	50649375	50650147	1000	-	.	gene_id "MSTRG.21634"; transcript_id "MSTRG.21634.2";
6	StringTie	exon	50649375	50649934	1000	-	.	gene_id "MSTRG.21634"; transcript_id "MSTRG.21634.2"; exon_number "1";
6	StringTie	exon	50650031	50650147	1000	-	.	gene_id "MSTRG.21634"; transcript_id "MSTRG.21634.2"; exon_number "2";
6	StringTie	transcript	50765730	50772715	1000	-	.	gene_id "MSTRG.21648"; transcript_id "MSTRG.21648.1";
6	StringTie	exon	50765730	50765981	1000	-	.	gene_id "MSTRG.21648"; transcript_id "MSTRG.21648.1"; exon_number "1";
6	StringTie	exon	50766281	50766847	1000	-	.	gene_id "MSTRG.21648"; transcript_id "MSTRG.21648.1"; exon_number "2";
6	StringTie	exon	50772519	50772715	1000	-	.	gene_id "MSTRG.21648"; transcript_id "MSTRG.21648.1"; exon_number "3";
6	StringTie	transcript	50765732	50772739	1000	-	.	gene_id "MSTRG.21648"; transcript_id "MSTRG.21648.2";
6	StringTie	exon	50765732	50766847	1000	-	.	gene_id "MSTRG.21648"; transcript_id "MSTRG.21648.2"; exon_number "1";
6	StringTie	exon	50772519	50772739	1000	-	.	gene_id "MSTRG.21648"; transcript_id "MSTRG.21648.2"; exon_number "2";
6	StringTie	transcript	52469147	52472366	1000	-	.	gene_id "MSTRG.21727"; transcript_id "MSTRG.21727.1";
6	StringTie	exon	52469147	52469986	1000	-	.	gene_id "MSTRG.21727"; transcript_id "MSTRG.21727.1"; exon_number "1";
6	StringTie	exon	52472192	52472366	1000	-	.	gene_id "MSTRG.21727"; transcript_id "MSTRG.21727.1"; exon_number "2";
6	StringTie	transcript	53378758	53385419	1000	-	.	gene_id "MSTRG.21774"; transcript_id "MSTRG.21774.1";
6	StringTie	exon	53378758	53380881	1000	-	.	gene_id "MSTRG.21774"; transcript_id "MSTRG.21774.1"; exon_number "1";
6	StringTie	exon	53381782	53382067	1000	-	.	gene_id "MSTRG.21774"; transcript_id "MSTRG.21774.1"; exon_number "2";
6	StringTie	exon	53385086	53385419	1000	-	.	gene_id "MSTRG.21774"; transcript_id "MSTRG.21774.1"; exon_number "3";
6	StringTie	transcript	53379626	53384376	1000	-	.	gene_id "MSTRG.21774"; transcript_id "MSTRG.21774.2";
6	StringTie	exon	53379626	53380881	1000	-	.	gene_id "MSTRG.21774"; transcript_id "MSTRG.21774.2"; exon_number "1";
6	StringTie	exon	53381782	53382067	1000	-	.	gene_id "MSTRG.21774"; transcript_id "MSTRG.21774.2"; exon_number "2";
6	StringTie	exon	53384325	53384376	1000	-	.	gene_id "MSTRG.21774"; transcript_id "MSTRG.21774.2"; exon_number "3";
6	StringTie	transcript	54677000	54678221	1000	-	.	gene_id "MSTRG.21841"; transcript_id "MSTRG.21841.1";
6	StringTie	exon	54677000	54677804	1000	-	.	gene_id "MSTRG.21841"; transcript_id "MSTRG.21841.1"; exon_number "1";
6	StringTie	exon	54677913	54678221	1000	-	.	gene_id "MSTRG.21841"; transcript_id "MSTRG.21841.1"; exon_number "2";
6	StringTie	transcript	58295104	58296282	1000	-	.	gene_id "MSTRG.21973"; transcript_id "MSTRG.21973.1";
6	StringTie	exon	58295104	58295179	1000	-	.	gene_id "MSTRG.21973"; transcript_id "MSTRG.21973.1"; exon_number "1";
6	StringTie	exon	58295859	58296282	1000	-	.	gene_id "MSTRG.21973"; transcript_id "MSTRG.21973.1"; exon_number "2";
6	StringTie	transcript	58335255	58339033	1000	+	.	gene_id "MSTRG.21979"; transcript_id "MSTRG.21979.1";
6	StringTie	exon	58335255	58335745	1000	+	.	gene_id "MSTRG.21979"; transcript_id "MSTRG.21979.1"; exon_number "1";
6	StringTie	exon	58338016	58339033	1000	+	.	gene_id "MSTRG.21979"; transcript_id "MSTRG.21979.1"; exon_number "2";
6	StringTie	transcript	63365408	63365920	1000	-	.	gene_id "MSTRG.22176"; transcript_id "MSTRG.22176.5";
6	StringTie	exon	63365408	63365698	1000	-	.	gene_id "MSTRG.22176"; transcript_id "MSTRG.22176.5"; exon_number "1";
6	StringTie	exon	63365847	63365920	1000	-	.	gene_id "MSTRG.22176"; transcript_id "MSTRG.22176.5"; exon_number "2";
6	StringTie	transcript	64700089	64700876	1000	-	.	gene_id "MSTRG.22305"; transcript_id "MSTRG.22305.2";
6	StringTie	exon	64700089	64700291	1000	-	.	gene_id "MSTRG.22305"; transcript_id "MSTRG.22305.2"; exon_number "1";
6	StringTie	exon	64700382	64700876	1000	-	.	gene_id "MSTRG.22305"; transcript_id "MSTRG.22305.2"; exon_number "2";
6	StringTie	transcript	71167007	71174911	1000	-	.	gene_id "MSTRG.22409"; transcript_id "MSTRG.22409.1";
6	StringTie	exon	71167007	71168140	1000	-	.	gene_id "MSTRG.22409"; transcript_id "MSTRG.22409.1"; exon_number "1";
6	StringTie	exon	71168613	71168825	1000	-	.	gene_id "MSTRG.22409"; transcript_id "MSTRG.22409.1"; exon_number "2";
6	StringTie	exon	71174745	71174911	1000	-	.	gene_id "MSTRG.22409"; transcript_id "MSTRG.22409.1"; exon_number "3";
6	StringTie	transcript	71167948	71174889	1000	-	.	gene_id "MSTRG.22409"; transcript_id "MSTRG.22409.2";
6	StringTie	exon	71167948	71168140	1000	-	.	gene_id "MSTRG.22409"; transcript_id "MSTRG.22409.2"; exon_number "1";
6	StringTie	exon	71168482	71168825	1000	-	.	gene_id "MSTRG.22409"; transcript_id "MSTRG.22409.2"; exon_number "2";
6	StringTie	exon	71174745	71174889	1000	-	.	gene_id "MSTRG.22409"; transcript_id "MSTRG.22409.2"; exon_number "3";
6	StringTie	transcript	72599360	72601654	1000	+	.	gene_id "MSTRG.22451"; transcript_id "MSTRG.22451.1";
6	StringTie	exon	72599360	72599598	1000	+	.	gene_id "MSTRG.22451"; transcript_id "MSTRG.22451.1"; exon_number "1";
6	StringTie	exon	72601047	72601654	1000	+	.	gene_id "MSTRG.22451"; transcript_id "MSTRG.22451.1"; exon_number "2";
6	StringTie	transcript	78046088	78053989	1000	+	.	gene_id "MSTRG.22508"; transcript_id "MSTRG.22508.2";
6	StringTie	exon	78046088	78046275	1000	+	.	gene_id "MSTRG.22508"; transcript_id "MSTRG.22508.2"; exon_number "1";
6	StringTie	exon	78049664	78049736	1000	+	.	gene_id "MSTRG.22508"; transcript_id "MSTRG.22508.2"; exon_number "2";
6	StringTie	exon	78053944	78053989	1000	+	.	gene_id "MSTRG.22508"; transcript_id "MSTRG.22508.2"; exon_number "3";
6	StringTie	transcript	81796055	81799002	1000	-	.	gene_id "MSTRG.22587"; transcript_id "MSTRG.22587.1";
6	StringTie	exon	81796055	81797174	1000	-	.	gene_id "MSTRG.22587"; transcript_id "MSTRG.22587.1"; exon_number "1";
6	StringTie	exon	81798701	81799002	1000	-	.	gene_id "MSTRG.22587"; transcript_id "MSTRG.22587.1"; exon_number "2";
6	StringTie	transcript	84697881	84708174	1000	+	.	gene_id "MSTRG.22679"; transcript_id "MSTRG.22679.1";
6	StringTie	exon	84697881	84697963	1000	+	.	gene_id "MSTRG.22679"; transcript_id "MSTRG.22679.1"; exon_number "1";
6	StringTie	exon	84706200	84708174	1000	+	.	gene_id "MSTRG.22679"; transcript_id "MSTRG.22679.1"; exon_number "2";
6	StringTie	transcript	87951857	87955309	1000	+	.	gene_id "MSTRG.22734"; transcript_id "MSTRG.22734.3";
6	StringTie	exon	87951857	87952030	1000	+	.	gene_id "MSTRG.22734"; transcript_id "MSTRG.22734.3"; exon_number "1";
6	StringTie	exon	87952760	87952907	1000	+	.	gene_id "MSTRG.22734"; transcript_id "MSTRG.22734.3"; exon_number "2";
6	StringTie	exon	87953179	87953367	1000	+	.	gene_id "MSTRG.22734"; transcript_id "MSTRG.22734.3"; exon_number "3";
6	StringTie	exon	87954888	87955309	1000	+	.	gene_id "MSTRG.22734"; transcript_id "MSTRG.22734.3"; exon_number "4";
6	StringTie	transcript	89327934	89328496	1000	-	.	gene_id "MSTRG.22781"; transcript_id "MSTRG.22781.1";
6	StringTie	exon	89327934	89328132	1000	-	.	gene_id "MSTRG.22781"; transcript_id "MSTRG.22781.1"; exon_number "1";
6	StringTie	exon	89328394	89328496	1000	-	.	gene_id "MSTRG.22781"; transcript_id "MSTRG.22781.1"; exon_number "2";
6	StringTie	transcript	92336317	92340889	1000	+	.	gene_id "MSTRG.22812"; transcript_id "MSTRG.22812.1";
6	StringTie	exon	92336317	92336418	1000	+	.	gene_id "MSTRG.22812"; transcript_id "MSTRG.22812.1"; exon_number "1";
6	StringTie	exon	92339062	92340889	1000	+	.	gene_id "MSTRG.22812"; transcript_id "MSTRG.22812.1"; exon_number "2";
6	StringTie	transcript	93530247	93541200	1000	-	.	gene_id "MSTRG.22831"; transcript_id "MSTRG.22831.2";
6	StringTie	exon	93530247	93533701	1000	-	.	gene_id "MSTRG.22831"; transcript_id "MSTRG.22831.2"; exon_number "1";
6	StringTie	exon	93536923	93537075	1000	-	.	gene_id "MSTRG.22831"; transcript_id "MSTRG.22831.2"; exon_number "2";
6	StringTie	exon	93541094	93541200	1000	-	.	gene_id "MSTRG.22831"; transcript_id "MSTRG.22831.2"; exon_number "3";
6	StringTie	transcript	97242941	97249006	1000	+	.	gene_id "MSTRG.22916"; transcript_id "MSTRG.22916.1";
6	StringTie	exon	97242941	97243250	1000	+	.	gene_id "MSTRG.22916"; transcript_id "MSTRG.22916.1"; exon_number "1";
6	StringTie	exon	97248057	97249006	1000	+	.	gene_id "MSTRG.22916"; transcript_id "MSTRG.22916.1"; exon_number "2";
6	StringTie	transcript	98451621	98458137	1000	+	.	gene_id "MSTRG.22933"; transcript_id "MSTRG.22933.1";
6	StringTie	exon	98451621	98452122	1000	+	.	gene_id "MSTRG.22933"; transcript_id "MSTRG.22933.1"; exon_number "1";
6	StringTie	exon	98457044	98458137	1000	+	.	gene_id "MSTRG.22933"; transcript_id "MSTRG.22933.1"; exon_number "2";
6	StringTie	transcript	98896708	98904771	1000	+	.	gene_id "MSTRG.22944"; transcript_id "MSTRG.22944.1";
6	StringTie	exon	98896708	98896853	1000	+	.	gene_id "MSTRG.22944"; transcript_id "MSTRG.22944.1"; exon_number "1";
6	StringTie	exon	98904367	98904771	1000	+	.	gene_id "MSTRG.22944"; transcript_id "MSTRG.22944.1"; exon_number "2";
6	StringTie	transcript	100172877	100204096	1000	-	.	gene_id "MSTRG.22951"; transcript_id "MSTRG.22951.1";
6	StringTie	exon	100172877	100172923	1000	-	.	gene_id "MSTRG.22951"; transcript_id "MSTRG.22951.1"; exon_number "1";
6	StringTie	exon	100201926	100202074	1000	-	.	gene_id "MSTRG.22951"; transcript_id "MSTRG.22951.1"; exon_number "2";
6	StringTie	exon	100203977	100204096	1000	-	.	gene_id "MSTRG.22951"; transcript_id "MSTRG.22951.1"; exon_number "3";
6	StringTie	transcript	100188568	100204109	1000	-	.	gene_id "MSTRG.22951"; transcript_id "MSTRG.22951.2";
6	StringTie	exon	100188568	100190885	1000	-	.	gene_id "MSTRG.22951"; transcript_id "MSTRG.22951.2"; exon_number "1";
6	StringTie	exon	100201926	100202074	1000	-	.	gene_id "MSTRG.22951"; transcript_id "MSTRG.22951.2"; exon_number "2";
6	StringTie	exon	100202561	100202696	1000	-	.	gene_id "MSTRG.22951"; transcript_id "MSTRG.22951.2"; exon_number "3";
6	StringTie	exon	100203977	100204109	1000	-	.	gene_id "MSTRG.22951"; transcript_id "MSTRG.22951.2"; exon_number "4";
6	StringTie	transcript	100192977	100204089	1000	-	.	gene_id "MSTRG.22951"; transcript_id "MSTRG.22951.3";
6	StringTie	exon	100192977	100193047	1000	-	.	gene_id "MSTRG.22951"; transcript_id "MSTRG.22951.3"; exon_number "1";
6	StringTie	exon	100201926	100202074	1000	-	.	gene_id "MSTRG.22951"; transcript_id "MSTRG.22951.3"; exon_number "2";
6	StringTie	exon	100202561	100202696	1000	-	.	gene_id "MSTRG.22951"; transcript_id "MSTRG.22951.3"; exon_number "3";
6	StringTie	exon	100203977	100204089	1000	-	.	gene_id "MSTRG.22951"; transcript_id "MSTRG.22951.3"; exon_number "4";
6	StringTie	transcript	101794796	101810346	1000	+	.	gene_id "MSTRG.22961"; transcript_id "MSTRG.22961.4";
6	StringTie	exon	101794796	101794839	1000	+	.	gene_id "MSTRG.22961"; transcript_id "MSTRG.22961.4"; exon_number "1";
6	StringTie	exon	101795371	101795586	1000	+	.	gene_id "MSTRG.22961"; transcript_id "MSTRG.22961.4"; exon_number "2";
6	StringTie	exon	101798736	101798807	1000	+	.	gene_id "MSTRG.22961"; transcript_id "MSTRG.22961.4"; exon_number "3";
6	StringTie	exon	101810077	101810346	1000	+	.	gene_id "MSTRG.22961"; transcript_id "MSTRG.22961.4"; exon_number "4";
6	StringTie	transcript	129969210	129988574	1000	+	.	gene_id "MSTRG.23149"; transcript_id "MSTRG.23149.1";
6	StringTie	exon	129969210	129969342	1000	+	.	gene_id "MSTRG.23149"; transcript_id "MSTRG.23149.1"; exon_number "1";
6	StringTie	exon	129971484	129971573	1000	+	.	gene_id "MSTRG.23149"; transcript_id "MSTRG.23149.1"; exon_number "2";
6	StringTie	exon	129988386	129988574	1000	+	.	gene_id "MSTRG.23149"; transcript_id "MSTRG.23149.1"; exon_number "3";
6	StringTie	transcript	138106045	138108392	1000	+	.	gene_id "MSTRG.23177"; transcript_id "MSTRG.23177.1";
6	StringTie	exon	138106045	138106093	1000	+	.	gene_id "MSTRG.23177"; transcript_id "MSTRG.23177.1"; exon_number "1";
6	StringTie	exon	138108204	138108392	1000	+	.	gene_id "MSTRG.23177"; transcript_id "MSTRG.23177.1"; exon_number "2";
6	StringTie	transcript	142162319	142371135	1000	-	.	gene_id "MSTRG.23206"; transcript_id "MSTRG.23206.2";
6	StringTie	exon	142162319	142163256	1000	-	.	gene_id "MSTRG.23206"; transcript_id "MSTRG.23206.2"; exon_number "1";
6	StringTie	exon	142163422	142163468	1000	-	.	gene_id "MSTRG.23206"; transcript_id "MSTRG.23206.2"; exon_number "2";
6	StringTie	exon	142271334	142271425	1000	-	.	gene_id "MSTRG.23206"; transcript_id "MSTRG.23206.2"; exon_number "3";
6	StringTie	exon	142371079	142371135	1000	-	.	gene_id "MSTRG.23206"; transcript_id "MSTRG.23206.2"; exon_number "4";
6	StringTie	transcript	146142912	146150282	1000	+	.	gene_id "MSTRG.23252"; transcript_id "MSTRG.23252.1";
6	StringTie	exon	146142912	146143109	1000	+	.	gene_id "MSTRG.23252"; transcript_id "MSTRG.23252.1"; exon_number "1";
6	StringTie	exon	146150171	146150282	1000	+	.	gene_id "MSTRG.23252"; transcript_id "MSTRG.23252.1"; exon_number "2";
6	StringTie	transcript	149156859	149157948	1000	+	.	gene_id "MSTRG.23292"; transcript_id "MSTRG.23292.1";
6	StringTie	exon	149156859	149156879	1000	+	.	gene_id "MSTRG.23292"; transcript_id "MSTRG.23292.1"; exon_number "1";
6	StringTie	exon	149157084	149157203	1000	+	.	gene_id "MSTRG.23292"; transcript_id "MSTRG.23292.1"; exon_number "2";
6	StringTie	exon	149157874	149157948	1000	+	.	gene_id "MSTRG.23292"; transcript_id "MSTRG.23292.1"; exon_number "3";
6	StringTie	transcript	150773866	150777579	1000	+	.	gene_id "MSTRG.23304"; transcript_id "MSTRG.23304.1";
6	StringTie	exon	150773866	150774123	1000	+	.	gene_id "MSTRG.23304"; transcript_id "MSTRG.23304.1"; exon_number "1";
6	StringTie	exon	150776897	150777579	1000	+	.	gene_id "MSTRG.23304"; transcript_id "MSTRG.23304.1"; exon_number "2";
6	StringTie	transcript	151245365	151251512	1000	+	.	gene_id "MSTRG.23306"; transcript_id "MSTRG.23306.1";
6	StringTie	exon	151245365	151245545	1000	+	.	gene_id "MSTRG.23306"; transcript_id "MSTRG.23306.1"; exon_number "1";
6	StringTie	exon	151250674	151251512	1000	+	.	gene_id "MSTRG.23306"; transcript_id "MSTRG.23306.1"; exon_number "2";
6	StringTie	transcript	155681042	155682345	1000	-	.	gene_id "MSTRG.23329"; transcript_id "MSTRG.23329.1";
6	StringTie	exon	155681042	155681393	1000	-	.	gene_id "MSTRG.23329"; transcript_id "MSTRG.23329.1"; exon_number "1";
6	StringTie	exon	155682096	155682345	1000	-	.	gene_id "MSTRG.23329"; transcript_id "MSTRG.23329.1"; exon_number "2";
6	StringTie	transcript	157151941	157198284	1000	-	.	gene_id "MSTRG.23361"; transcript_id "MSTRG.23361.2";
6	StringTie	exon	157151941	157152017	1000	-	.	gene_id "MSTRG.23361"; transcript_id "MSTRG.23361.2"; exon_number "1";
6	StringTie	exon	157197784	157197841	1000	-	.	gene_id "MSTRG.23361"; transcript_id "MSTRG.23361.2"; exon_number "2";
6	StringTie	exon	157198205	157198284	1000	-	.	gene_id "MSTRG.23361"; transcript_id "MSTRG.23361.2"; exon_number "3";
6	StringTie	transcript	158788934	158793357	1000	+	.	gene_id "MSTRG.23373"; transcript_id "MSTRG.23373.1";
6	StringTie	exon	158788934	158788957	1000	+	.	gene_id "MSTRG.23373"; transcript_id "MSTRG.23373.1"; exon_number "1";
6	StringTie	exon	158793099	158793357	1000	+	.	gene_id "MSTRG.23373"; transcript_id "MSTRG.23373.1"; exon_number "2";
6	StringTie	transcript	163604394	163606206	1000	-	.	gene_id "MSTRG.23454"; transcript_id "MSTRG.23454.1";
6	StringTie	exon	163604394	163604481	1000	-	.	gene_id "MSTRG.23454"; transcript_id "MSTRG.23454.1"; exon_number "1";
6	StringTie	exon	163606093	163606206	1000	-	.	gene_id "MSTRG.23454"; transcript_id "MSTRG.23454.1"; exon_number "2";
6	StringTie	transcript	167216398	167234078	1000	-	.	gene_id "MSTRG.23558"; transcript_id "MSTRG.23558.1";
6	StringTie	exon	167216398	167218034	1000	-	.	gene_id "MSTRG.23558"; transcript_id "MSTRG.23558.1"; exon_number "1";
6	StringTie	exon	167218420	167218492	1000	-	.	gene_id "MSTRG.23558"; transcript_id "MSTRG.23558.1"; exon_number "2";
6	StringTie	exon	167233537	167234078	1000	-	.	gene_id "MSTRG.23558"; transcript_id "MSTRG.23558.1"; exon_number "3";
6	StringTie	transcript	169732413	169733374	1000	+	.	gene_id "MSTRG.23601"; transcript_id "MSTRG.23601.1";
6	StringTie	exon	169732413	169732850	1000	+	.	gene_id "MSTRG.23601"; transcript_id "MSTRG.23601.1"; exon_number "1";
6	StringTie	exon	169733040	169733374	1000	+	.	gene_id "MSTRG.23601"; transcript_id "MSTRG.23601.1"; exon_number "2";
6	StringTie	transcript	169216241	169221319	1000	-	.	gene_id "MSTRG.23602"; transcript_id "MSTRG.23602.1";
6	StringTie	exon	169216241	169216681	1000	-	.	gene_id "MSTRG.23602"; transcript_id "MSTRG.23602.1"; exon_number "1";
6	StringTie	exon	169220489	169221319	1000	-	.	gene_id "MSTRG.23602"; transcript_id "MSTRG.23602.1"; exon_number "2";
7	StringTie	transcript	490228	492421	1000	+	.	gene_id "MSTRG.23657"; transcript_id "MSTRG.23657.1";
7	StringTie	exon	490228	490420	1000	+	.	gene_id "MSTRG.23657"; transcript_id "MSTRG.23657.1"; exon_number "1";
7	StringTie	exon	491753	492421	1000	+	.	gene_id "MSTRG.23657"; transcript_id "MSTRG.23657.1"; exon_number "2";
7	StringTie	transcript	1344004	1347900	1000	+	.	gene_id "MSTRG.23663"; transcript_id "MSTRG.23663.1";
7	StringTie	exon	1344004	1344435	1000	+	.	gene_id "MSTRG.23663"; transcript_id "MSTRG.23663.1"; exon_number "1";
7	StringTie	exon	1345121	1347900	1000	+	.	gene_id "MSTRG.23663"; transcript_id "MSTRG.23663.1"; exon_number "2";
7	StringTie	transcript	1344277	1347590	1000	+	.	gene_id "MSTRG.23663"; transcript_id "MSTRG.23663.2";
7	StringTie	exon	1344277	1344435	1000	+	.	gene_id "MSTRG.23663"; transcript_id "MSTRG.23663.2"; exon_number "1";
7	StringTie	exon	1345124	1347590	1000	+	.	gene_id "MSTRG.23663"; transcript_id "MSTRG.23663.2"; exon_number "2";
7	StringTie	transcript	1653060	1656431	1000	-	.	gene_id "MSTRG.23681"; transcript_id "MSTRG.23681.1";
7	StringTie	exon	1653060	1654182	1000	-	.	gene_id "MSTRG.23681"; transcript_id "MSTRG.23681.1"; exon_number "1";
7	StringTie	exon	1656016	1656431	1000	-	.	gene_id "MSTRG.23681"; transcript_id "MSTRG.23681.1"; exon_number "2";
7	StringTie	transcript	2446393	2463110	1000	+	.	gene_id "MSTRG.23696"; transcript_id "MSTRG.23696.1";
7	StringTie	exon	2446393	2446597	1000	+	.	gene_id "MSTRG.23696"; transcript_id "MSTRG.23696.1"; exon_number "1";
7	StringTie	exon	2462750	2463110	1000	+	.	gene_id "MSTRG.23696"; transcript_id "MSTRG.23696.1"; exon_number "2";
7	StringTie	transcript	2503526	2515632	1000	+	.	gene_id "MSTRG.23697"; transcript_id "MSTRG.23697.1";
7	StringTie	exon	2503526	2503872	1000	+	.	gene_id "MSTRG.23697"; transcript_id "MSTRG.23697.1"; exon_number "1";
7	StringTie	exon	2506539	2506707	1000	+	.	gene_id "MSTRG.23697"; transcript_id "MSTRG.23697.1"; exon_number "2";
7	StringTie	exon	2515062	2515632	1000	+	.	gene_id "MSTRG.23697"; transcript_id "MSTRG.23697.1"; exon_number "3";
7	StringTie	transcript	6061640	6080386	1000	+	.	gene_id "MSTRG.23764"; transcript_id "MSTRG.23764.1";
7	StringTie	exon	6061640	6061815	1000	+	.	gene_id "MSTRG.23764"; transcript_id "MSTRG.23764.1"; exon_number "1";
7	StringTie	exon	6079921	6080386	1000	+	.	gene_id "MSTRG.23764"; transcript_id "MSTRG.23764.1"; exon_number "2";
7	StringTie	transcript	11243868	11245164	1000	-	.	gene_id "MSTRG.23804"; transcript_id "MSTRG.23804.1";
7	StringTie	exon	11243868	11244290	1000	-	.	gene_id "MSTRG.23804"; transcript_id "MSTRG.23804.1"; exon_number "1";
7	StringTie	exon	11245146	11245164	1000	-	.	gene_id "MSTRG.23804"; transcript_id "MSTRG.23804.1"; exon_number "2";
7	StringTie	transcript	10925227	10931053	1000	+	.	gene_id "MSTRG.23805"; transcript_id "MSTRG.23805.1";
7	StringTie	exon	10925227	10925293	1000	+	.	gene_id "MSTRG.23805"; transcript_id "MSTRG.23805.1"; exon_number "1";
7	StringTie	exon	10927381	10931053	1000	+	.	gene_id "MSTRG.23805"; transcript_id "MSTRG.23805.1"; exon_number "2";
7	StringTie	transcript	12733845	12735594	1000	+	.	gene_id "MSTRG.23818"; transcript_id "MSTRG.23818.1";
7	StringTie	exon	12733845	12733978	1000	+	.	gene_id "MSTRG.23818"; transcript_id "MSTRG.23818.1"; exon_number "1";
7	StringTie	exon	12734804	12735594	1000	+	.	gene_id "MSTRG.23818"; transcript_id "MSTRG.23818.1"; exon_number "2";
7	StringTie	transcript	12757440	12757830	1000	+	.	gene_id "MSTRG.23819"; transcript_id "MSTRG.23819.1";
7	StringTie	exon	12757440	12757471	1000	+	.	gene_id "MSTRG.23819"; transcript_id "MSTRG.23819.1"; exon_number "1";
7	StringTie	exon	12757641	12757830	1000	+	.	gene_id "MSTRG.23819"; transcript_id "MSTRG.23819.1"; exon_number "2";
7	StringTie	transcript	16727806	16729621	1000	-	.	gene_id "MSTRG.23842"; transcript_id "MSTRG.23842.1";
7	StringTie	exon	16727806	16728136	1000	-	.	gene_id "MSTRG.23842"; transcript_id "MSTRG.23842.1"; exon_number "1";
7	StringTie	exon	16729581	16729621	1000	-	.	gene_id "MSTRG.23842"; transcript_id "MSTRG.23842.1"; exon_number "2";
7	StringTie	transcript	20780408	20783645	1000	-	.	gene_id "MSTRG.23894"; transcript_id "MSTRG.23894.1";
7	StringTie	exon	20780408	20780744	1000	-	.	gene_id "MSTRG.23894"; transcript_id "MSTRG.23894.1"; exon_number "1";
7	StringTie	exon	20783504	20783645	1000	-	.	gene_id "MSTRG.23894"; transcript_id "MSTRG.23894.1"; exon_number "2";
7	StringTie	transcript	21255889	21267167	1000	+	.	gene_id "MSTRG.23936"; transcript_id "MSTRG.23936.1";
7	StringTie	exon	21255889	21255938	1000	+	.	gene_id "MSTRG.23936"; transcript_id "MSTRG.23936.1"; exon_number "1";
7	StringTie	exon	21262582	21262667	1000	+	.	gene_id "MSTRG.23936"; transcript_id "MSTRG.23936.1"; exon_number "2";
7	StringTie	exon	21264468	21264558	1000	+	.	gene_id "MSTRG.23936"; transcript_id "MSTRG.23936.1"; exon_number "3";
7	StringTie	exon	21267086	21267167	1000	+	.	gene_id "MSTRG.23936"; transcript_id "MSTRG.23936.1"; exon_number "4";
7	StringTie	transcript	32345331	32347343	1000	+	.	gene_id "MSTRG.24252"; transcript_id "MSTRG.24252.1";
7	StringTie	exon	32345331	32345469	1000	+	.	gene_id "MSTRG.24252"; transcript_id "MSTRG.24252.1"; exon_number "1";
7	StringTie	exon	32347189	32347343	1000	+	.	gene_id "MSTRG.24252"; transcript_id "MSTRG.24252.1"; exon_number "2";
7	StringTie	transcript	32739104	32755401	1000	+	.	gene_id "MSTRG.24270"; transcript_id "MSTRG.24270.1";
7	StringTie	exon	32739104	32739166	1000	+	.	gene_id "MSTRG.24270"; transcript_id "MSTRG.24270.1"; exon_number "1";
7	StringTie	exon	32755102	32755401	1000	+	.	gene_id "MSTRG.24270"; transcript_id "MSTRG.24270.1"; exon_number "2";
7	StringTie	transcript	32739132	32755464	1000	+	.	gene_id "MSTRG.24270"; transcript_id "MSTRG.24270.3";
7	StringTie	exon	32739132	32739166	1000	+	.	gene_id "MSTRG.24270"; transcript_id "MSTRG.24270.3"; exon_number "1";
7	StringTie	exon	32750281	32750388	1000	+	.	gene_id "MSTRG.24270"; transcript_id "MSTRG.24270.3"; exon_number "2";
7	StringTie	exon	32752277	32752399	1000	+	.	gene_id "MSTRG.24270"; transcript_id "MSTRG.24270.3"; exon_number "3";
7	StringTie	exon	32755102	32755464	1000	+	.	gene_id "MSTRG.24270"; transcript_id "MSTRG.24270.3"; exon_number "4";
7	StringTie	transcript	34122563	34131080	1000	+	.	gene_id "MSTRG.24291"; transcript_id "MSTRG.24291.3";
7	StringTie	exon	34122563	34122874	1000	+	.	gene_id "MSTRG.24291"; transcript_id "MSTRG.24291.3"; exon_number "1";
7	StringTie	exon	34125200	34125310	1000	+	.	gene_id "MSTRG.24291"; transcript_id "MSTRG.24291.3"; exon_number "2";
7	StringTie	exon	34126262	34126336	1000	+	.	gene_id "MSTRG.24291"; transcript_id "MSTRG.24291.3"; exon_number "3";
7	StringTie	exon	34129058	34129198	1000	+	.	gene_id "MSTRG.24291"; transcript_id "MSTRG.24291.3"; exon_number "4";
7	StringTie	exon	34130513	34131080	1000	+	.	gene_id "MSTRG.24291"; transcript_id "MSTRG.24291.3"; exon_number "5";
7	StringTie	transcript	34122712	34130763	1000	+	.	gene_id "MSTRG.24291"; transcript_id "MSTRG.24291.4";
7	StringTie	exon	34122712	34122874	1000	+	.	gene_id "MSTRG.24291"; transcript_id "MSTRG.24291.4"; exon_number "1";
7	StringTie	exon	34129058	34129198	1000	+	.	gene_id "MSTRG.24291"; transcript_id "MSTRG.24291.4"; exon_number "2";
7	StringTie	exon	34130513	34130763	1000	+	.	gene_id "MSTRG.24291"; transcript_id "MSTRG.24291.4"; exon_number "3";
7	StringTie	transcript	34122738	34130782	1000	+	.	gene_id "MSTRG.24291"; transcript_id "MSTRG.24291.5";
7	StringTie	exon	34122738	34123476	1000	+	.	gene_id "MSTRG.24291"; transcript_id "MSTRG.24291.5"; exon_number "1";
7	StringTie	exon	34125200	34125310	1000	+	.	gene_id "MSTRG.24291"; transcript_id "MSTRG.24291.5"; exon_number "2";
7	StringTie	exon	34126262	34126336	1000	+	.	gene_id "MSTRG.24291"; transcript_id "MSTRG.24291.5"; exon_number "3";
7	StringTie	exon	34129058	34129198	1000	+	.	gene_id "MSTRG.24291"; transcript_id "MSTRG.24291.5"; exon_number "4";
7	StringTie	exon	34130521	34130782	1000	+	.	gene_id "MSTRG.24291"; transcript_id "MSTRG.24291.5"; exon_number "5";
7	StringTie	transcript	34122741	34130927	1000	+	.	gene_id "MSTRG.24291"; transcript_id "MSTRG.24291.6";
7	StringTie	exon	34122741	34123476	1000	+	.	gene_id "MSTRG.24291"; transcript_id "MSTRG.24291.6"; exon_number "1";
7	StringTie	exon	34125200	34125310	1000	+	.	gene_id "MSTRG.24291"; transcript_id "MSTRG.24291.6"; exon_number "2";
7	StringTie	exon	34126262	34126336	1000	+	.	gene_id "MSTRG.24291"; transcript_id "MSTRG.24291.6"; exon_number "3";
7	StringTie	exon	34129058	34129198	1000	+	.	gene_id "MSTRG.24291"; transcript_id "MSTRG.24291.6"; exon_number "4";
7	StringTie	exon	34130513	34130927	1000	+	.	gene_id "MSTRG.24291"; transcript_id "MSTRG.24291.6"; exon_number "5";
7	StringTie	transcript	34123407	34130729	1000	+	.	gene_id "MSTRG.24291"; transcript_id "MSTRG.24291.8";
7	StringTie	exon	34123407	34123476	1000	+	.	gene_id "MSTRG.24291"; transcript_id "MSTRG.24291.8"; exon_number "1";
7	StringTie	exon	34125200	34125310	1000	+	.	gene_id "MSTRG.24291"; transcript_id "MSTRG.24291.8"; exon_number "2";
7	StringTie	exon	34129058	34129198	1000	+	.	gene_id "MSTRG.24291"; transcript_id "MSTRG.24291.8"; exon_number "3";
7	StringTie	exon	34130513	34130729	1000	+	.	gene_id "MSTRG.24291"; transcript_id "MSTRG.24291.8"; exon_number "4";
7	StringTie	transcript	34575279	34595949	1000	+	.	gene_id "MSTRG.24296"; transcript_id "MSTRG.24296.1";
7	StringTie	exon	34575279	34575436	1000	+	.	gene_id "MSTRG.24296"; transcript_id "MSTRG.24296.1"; exon_number "1";
7	StringTie	exon	34595626	34595949	1000	+	.	gene_id "MSTRG.24296"; transcript_id "MSTRG.24296.1"; exon_number "2";
7	StringTie	transcript	37963887	37966028	1000	-	.	gene_id "MSTRG.24348"; transcript_id "MSTRG.24348.2";
7	StringTie	exon	37963887	37964160	1000	-	.	gene_id "MSTRG.24348"; transcript_id "MSTRG.24348.2"; exon_number "1";
7	StringTie	exon	37965983	37966028	1000	-	.	gene_id "MSTRG.24348"; transcript_id "MSTRG.24348.2"; exon_number "2";
7	StringTie	transcript	38717521	38740536	1000	+	.	gene_id "MSTRG.24388"; transcript_id "MSTRG.24388.1";
7	StringTie	exon	38717521	38717787	1000	+	.	gene_id "MSTRG.24388"; transcript_id "MSTRG.24388.1"; exon_number "1";
7	StringTie	exon	38739178	38739375	1000	+	.	gene_id "MSTRG.24388"; transcript_id "MSTRG.24388.1"; exon_number "2";
7	StringTie	exon	38739998	38740536	1000	+	.	gene_id "MSTRG.24388"; transcript_id "MSTRG.24388.1"; exon_number "3";
7	StringTie	transcript	38738866	38740529	1000	+	.	gene_id "MSTRG.24388"; transcript_id "MSTRG.24388.2";
7	StringTie	exon	38738866	38738999	1000	+	.	gene_id "MSTRG.24388"; transcript_id "MSTRG.24388.2"; exon_number "1";
7	StringTie	exon	38739178	38739375	1000	+	.	gene_id "MSTRG.24388"; transcript_id "MSTRG.24388.2"; exon_number "2";
7	StringTie	exon	38739998	38740529	1000	+	.	gene_id "MSTRG.24388"; transcript_id "MSTRG.24388.2"; exon_number "3";
7	StringTie	transcript	45313190	45320536	1000	+	.	gene_id "MSTRG.24446"; transcript_id "MSTRG.24446.1";
7	StringTie	exon	45313190	45313208	1000	+	.	gene_id "MSTRG.24446"; transcript_id "MSTRG.24446.1"; exon_number "1";
7	StringTie	exon	45320115	45320536	1000	+	.	gene_id "MSTRG.24446"; transcript_id "MSTRG.24446.1"; exon_number "2";
7	StringTie	transcript	45320393	45336787	1000	-	.	gene_id "MSTRG.24447"; transcript_id "MSTRG.24447.1";
7	StringTie	exon	45320393	45320783	1000	-	.	gene_id "MSTRG.24447"; transcript_id "MSTRG.24447.1"; exon_number "1";
7	StringTie	exon	45336619	45336787	1000	-	.	gene_id "MSTRG.24447"; transcript_id "MSTRG.24447.1"; exon_number "2";
7	StringTie	transcript	46500383	46507582	1000	-	.	gene_id "MSTRG.24459"; transcript_id "MSTRG.24459.1";
7	StringTie	exon	46500383	46500780	1000	-	.	gene_id "MSTRG.24459"; transcript_id "MSTRG.24459.1"; exon_number "1";
7	StringTie	exon	46507444	46507582	1000	-	.	gene_id "MSTRG.24459"; transcript_id "MSTRG.24459.1"; exon_number "2";
7	StringTie	transcript	46706999	46720646	1000	-	.	gene_id "MSTRG.24468"; transcript_id "MSTRG.24468.5";
7	StringTie	exon	46706999	46707381	1000	-	.	gene_id "MSTRG.24468"; transcript_id "MSTRG.24468.5"; exon_number "1";
7	StringTie	exon	46720445	46720646	1000	-	.	gene_id "MSTRG.24468"; transcript_id "MSTRG.24468.5"; exon_number "2";
7	StringTie	transcript	46720832	46723246	1000	-	.	gene_id "MSTRG.24468"; transcript_id "MSTRG.24468.7";
7	StringTie	exon	46720832	46720995	1000	-	.	gene_id "MSTRG.24468"; transcript_id "MSTRG.24468.7"; exon_number "1";
7	StringTie	exon	46723148	46723246	1000	-	.	gene_id "MSTRG.24468"; transcript_id "MSTRG.24468.7"; exon_number "2";
7	StringTie	transcript	49099848	49103432	1000	-	.	gene_id "MSTRG.24489"; transcript_id "MSTRG.24489.1";
7	StringTie	exon	49099848	49100563	1000	-	.	gene_id "MSTRG.24489"; transcript_id "MSTRG.24489.1"; exon_number "1";
7	StringTie	exon	49100594	49103432	1000	-	.	gene_id "MSTRG.24489"; transcript_id "MSTRG.24489.1"; exon_number "2";
7	StringTie	transcript	51953594	51987833	1000	+	.	gene_id "MSTRG.24530"; transcript_id "MSTRG.24530.2";
7	StringTie	exon	51953594	51953762	1000	+	.	gene_id "MSTRG.24530"; transcript_id "MSTRG.24530.2"; exon_number "1";
7	StringTie	exon	51976882	51977274	1000	+	.	gene_id "MSTRG.24530"; transcript_id "MSTRG.24530.2"; exon_number "2";
7	StringTie	exon	51986362	51987833	1000	+	.	gene_id "MSTRG.24530"; transcript_id "MSTRG.24530.2"; exon_number "3";
7	StringTie	transcript	51953594	51987829	1000	+	.	gene_id "MSTRG.24530"; transcript_id "MSTRG.24530.3";
7	StringTie	exon	51953594	51953663	1000	+	.	gene_id "MSTRG.24530"; transcript_id "MSTRG.24530.3"; exon_number "1";
7	StringTie	exon	51976882	51977274	1000	+	.	gene_id "MSTRG.24530"; transcript_id "MSTRG.24530.3"; exon_number "2";
7	StringTie	exon	51982006	51982049	1000	+	.	gene_id "MSTRG.24530"; transcript_id "MSTRG.24530.3"; exon_number "3";
7	StringTie	exon	51986362	51987829	1000	+	.	gene_id "MSTRG.24530"; transcript_id "MSTRG.24530.3"; exon_number "4";
7	StringTie	transcript	58998804	59005188	1000	+	.	gene_id "MSTRG.24704"; transcript_id "MSTRG.24704.1";
7	StringTie	exon	58998804	58999183	1000	+	.	gene_id "MSTRG.24704"; transcript_id "MSTRG.24704.1"; exon_number "1";
7	StringTie	exon	59004401	59005188	1000	+	.	gene_id "MSTRG.24704"; transcript_id "MSTRG.24704.1"; exon_number "2";
7	StringTie	transcript	65103798	65108364	1000	+	.	gene_id "MSTRG.24776"; transcript_id "MSTRG.24776.1";
7	StringTie	exon	65103798	65104199	1000	+	.	gene_id "MSTRG.24776"; transcript_id "MSTRG.24776.1"; exon_number "1";
7	StringTie	exon	65105291	65105461	1000	+	.	gene_id "MSTRG.24776"; transcript_id "MSTRG.24776.1"; exon_number "2";
7	StringTie	exon	65107721	65107840	1000	+	.	gene_id "MSTRG.24776"; transcript_id "MSTRG.24776.1"; exon_number "3";
7	StringTie	exon	65108313	65108364	1000	+	.	gene_id "MSTRG.24776"; transcript_id "MSTRG.24776.1"; exon_number "4";
7	StringTie	transcript	65107719	65141257	1000	+	.	gene_id "MSTRG.24776"; transcript_id "MSTRG.24776.2";
7	StringTie	exon	65107719	65107840	1000	+	.	gene_id "MSTRG.24776"; transcript_id "MSTRG.24776.2"; exon_number "1";
7	StringTie	exon	65141081	65141257	1000	+	.	gene_id "MSTRG.24776"; transcript_id "MSTRG.24776.2"; exon_number "2";
7	StringTie	transcript	65787445	65794439	1000	-	.	gene_id "MSTRG.24782"; transcript_id "MSTRG.24782.1";
7	StringTie	exon	65787445	65787615	1000	-	.	gene_id "MSTRG.24782"; transcript_id "MSTRG.24782.1"; exon_number "1";
7	StringTie	exon	65790170	65790251	1000	-	.	gene_id "MSTRG.24782"; transcript_id "MSTRG.24782.1"; exon_number "2";
7	StringTie	exon	65794353	65794439	1000	-	.	gene_id "MSTRG.24782"; transcript_id "MSTRG.24782.1"; exon_number "3";
7	StringTie	transcript	86342515	86348492	1000	+	.	gene_id "MSTRG.25048"; transcript_id "MSTRG.25048.1";
7	StringTie	exon	86342515	86342570	1000	+	.	gene_id "MSTRG.25048"; transcript_id "MSTRG.25048.1"; exon_number "1";
7	StringTie	exon	86347886	86348016	1000	+	.	gene_id "MSTRG.25048"; transcript_id "MSTRG.25048.1"; exon_number "2";
7	StringTie	exon	86348433	86348492	1000	+	.	gene_id "MSTRG.25048"; transcript_id "MSTRG.25048.1"; exon_number "3";
7	StringTie	transcript	86109840	86123950	1000	-	.	gene_id "MSTRG.25052"; transcript_id "MSTRG.25052.5";
7	StringTie	exon	86109840	86110331	1000	-	.	gene_id "MSTRG.25052"; transcript_id "MSTRG.25052.5"; exon_number "1";
7	StringTie	exon	86115841	86115893	1000	-	.	gene_id "MSTRG.25052"; transcript_id "MSTRG.25052.5"; exon_number "2";
7	StringTie	exon	86121038	86121122	1000	-	.	gene_id "MSTRG.25052"; transcript_id "MSTRG.25052.5"; exon_number "3";
7	StringTie	exon	86121693	86121761	1000	-	.	gene_id "MSTRG.25052"; transcript_id "MSTRG.25052.5"; exon_number "4";
7	StringTie	exon	86123750	86123950	1000	-	.	gene_id "MSTRG.25052"; transcript_id "MSTRG.25052.5"; exon_number "5";
7	StringTie	transcript	86111193	86122886	1000	-	.	gene_id "MSTRG.25052"; transcript_id "MSTRG.25052.7";
7	StringTie	exon	86111193	86115893	1000	-	.	gene_id "MSTRG.25052"; transcript_id "MSTRG.25052.7"; exon_number "1";
7	StringTie	exon	86121038	86121122	1000	-	.	gene_id "MSTRG.25052"; transcript_id "MSTRG.25052.7"; exon_number "2";
7	StringTie	exon	86121693	86121761	1000	-	.	gene_id "MSTRG.25052"; transcript_id "MSTRG.25052.7"; exon_number "3";
7	StringTie	exon	86122129	86122886	1000	-	.	gene_id "MSTRG.25052"; transcript_id "MSTRG.25052.7"; exon_number "4";
7	StringTie	transcript	88552269	88553656	1000	-	.	gene_id "MSTRG.25072"; transcript_id "MSTRG.25072.4";
7	StringTie	exon	88552269	88552460	1000	-	.	gene_id "MSTRG.25072"; transcript_id "MSTRG.25072.4"; exon_number "1";
7	StringTie	exon	88553632	88553656	1000	-	.	gene_id "MSTRG.25072"; transcript_id "MSTRG.25072.4"; exon_number "2";
7	StringTie	transcript	100077069	100077666	1000	+	.	gene_id "MSTRG.25233"; transcript_id "MSTRG.25233.1";
7	StringTie	exon	100077069	100077330	1000	+	.	gene_id "MSTRG.25233"; transcript_id "MSTRG.25233.1"; exon_number "1";
7	StringTie	exon	100077569	100077666	1000	+	.	gene_id "MSTRG.25233"; transcript_id "MSTRG.25233.1"; exon_number "2";
7	StringTie	transcript	100123627	100124108	1000	+	.	gene_id "MSTRG.25242"; transcript_id "MSTRG.25242.2";
7	StringTie	exon	100123627	100123819	1000	+	.	gene_id "MSTRG.25242"; transcript_id "MSTRG.25242.2"; exon_number "1";
7	StringTie	exon	100123979	100124108	1000	+	.	gene_id "MSTRG.25242"; transcript_id "MSTRG.25242.2"; exon_number "2";
7	StringTie	transcript	100134082	100136098	1000	-	.	gene_id "MSTRG.25245"; transcript_id "MSTRG.25245.1";
7	StringTie	exon	100134082	100135290	1000	-	.	gene_id "MSTRG.25245"; transcript_id "MSTRG.25245.1"; exon_number "1";
7	StringTie	exon	100135551	100136098	1000	-	.	gene_id "MSTRG.25245"; transcript_id "MSTRG.25245.1"; exon_number "2";
7	StringTie	transcript	104009465	104012297	1000	+	.	gene_id "MSTRG.25281"; transcript_id "MSTRG.25281.1";
7	StringTie	exon	104009465	104009801	1000	+	.	gene_id "MSTRG.25281"; transcript_id "MSTRG.25281.1"; exon_number "1";
7	StringTie	exon	104010410	104012297	1000	+	.	gene_id "MSTRG.25281"; transcript_id "MSTRG.25281.1"; exon_number "2";
7	StringTie	transcript	104009467	104012693	1000	+	.	gene_id "MSTRG.25281"; transcript_id "MSTRG.25281.2";
7	StringTie	exon	104009467	104009596	1000	+	.	gene_id "MSTRG.25281"; transcript_id "MSTRG.25281.2"; exon_number "1";
7	StringTie	exon	104010410	104012693	1000	+	.	gene_id "MSTRG.25281"; transcript_id "MSTRG.25281.2"; exon_number "2";
7	StringTie	transcript	115273412	115276746	1000	+	.	gene_id "MSTRG.25331"; transcript_id "MSTRG.25331.1";
7	StringTie	exon	115273412	115273466	1000	+	.	gene_id "MSTRG.25331"; transcript_id "MSTRG.25331.1"; exon_number "1";
7	StringTie	exon	115274290	115274418	1000	+	.	gene_id "MSTRG.25331"; transcript_id "MSTRG.25331.1"; exon_number "2";
7	StringTie	exon	115276226	115276746	1000	+	.	gene_id "MSTRG.25331"; transcript_id "MSTRG.25331.1"; exon_number "3";
7	StringTie	transcript	118053308	118059947	1000	-	.	gene_id "MSTRG.25366"; transcript_id "MSTRG.25366.1";
7	StringTie	exon	118053308	118053570	1000	-	.	gene_id "MSTRG.25366"; transcript_id "MSTRG.25366.1"; exon_number "1";
7	StringTie	exon	118055210	118055396	1000	-	.	gene_id "MSTRG.25366"; transcript_id "MSTRG.25366.1"; exon_number "2";
7	StringTie	exon	118059705	118059947	1000	-	.	gene_id "MSTRG.25366"; transcript_id "MSTRG.25366.1"; exon_number "3";
8	StringTie	transcript	383157	383875	1000	+	.	gene_id "MSTRG.25468"; transcript_id "MSTRG.25468.1";
8	StringTie	exon	383157	383643	1000	+	.	gene_id "MSTRG.25468"; transcript_id "MSTRG.25468.1"; exon_number "1";
8	StringTie	exon	383824	383875	1000	+	.	gene_id "MSTRG.25468"; transcript_id "MSTRG.25468.1"; exon_number "2";
8	StringTie	transcript	356904	369303	1000	-	.	gene_id "MSTRG.25476"; transcript_id "MSTRG.25476.1";
8	StringTie	exon	356904	357880	1000	-	.	gene_id "MSTRG.25476"; transcript_id "MSTRG.25476.1"; exon_number "1";
8	StringTie	exon	363181	363222	1000	-	.	gene_id "MSTRG.25476"; transcript_id "MSTRG.25476.1"; exon_number "2";
8	StringTie	exon	366031	369303	1000	-	.	gene_id "MSTRG.25476"; transcript_id "MSTRG.25476.1"; exon_number "3";
8	StringTie	transcript	356904	366149	1000	-	.	gene_id "MSTRG.25476"; transcript_id "MSTRG.25476.2";
8	StringTie	exon	356904	357880	1000	-	.	gene_id "MSTRG.25476"; transcript_id "MSTRG.25476.2"; exon_number "1";
8	StringTie	exon	363181	363222	1000	-	.	gene_id "MSTRG.25476"; transcript_id "MSTRG.25476.2"; exon_number "2";
8	StringTie	exon	364467	364557	1000	-	.	gene_id "MSTRG.25476"; transcript_id "MSTRG.25476.2"; exon_number "3";
8	StringTie	exon	366031	366149	1000	-	.	gene_id "MSTRG.25476"; transcript_id "MSTRG.25476.2"; exon_number "4";
8	StringTie	transcript	365385	369125	1000	+	.	gene_id "MSTRG.25477"; transcript_id "MSTRG.25477.1";
8	StringTie	exon	365385	365472	1000	+	.	gene_id "MSTRG.25477"; transcript_id "MSTRG.25477.1"; exon_number "1";
8	StringTie	exon	366048	366148	1000	+	.	gene_id "MSTRG.25477"; transcript_id "MSTRG.25477.1"; exon_number "2";
8	StringTie	exon	368178	369125	1000	+	.	gene_id "MSTRG.25477"; transcript_id "MSTRG.25477.1"; exon_number "3";
8	StringTie	transcript	467909	473206	1000	-	.	gene_id "MSTRG.25484"; transcript_id "MSTRG.25484.1";
8	StringTie	exon	467909	469315	1000	-	.	gene_id "MSTRG.25484"; transcript_id "MSTRG.25484.1"; exon_number "1";
8	StringTie	exon	472945	473206	1000	-	.	gene_id "MSTRG.25484"; transcript_id "MSTRG.25484.1"; exon_number "2";
8	StringTie	transcript	468086	474007	1000	+	.	gene_id "MSTRG.25485"; transcript_id "MSTRG.25485.1";
8	StringTie	exon	468086	473204	1000	+	.	gene_id "MSTRG.25485"; transcript_id "MSTRG.25485.1"; exon_number "1";
8	StringTie	exon	473684	474007	1000	+	.	gene_id "MSTRG.25485"; transcript_id "MSTRG.25485.1"; exon_number "2";
8	StringTie	transcript	700888	702804	1000	-	.	gene_id "MSTRG.25496"; transcript_id "MSTRG.25496.1";
8	StringTie	exon	700888	700937	1000	-	.	gene_id "MSTRG.25496"; transcript_id "MSTRG.25496.1"; exon_number "1";
8	StringTie	exon	701026	701073	1000	-	.	gene_id "MSTRG.25496"; transcript_id "MSTRG.25496.1"; exon_number "2";
8	StringTie	exon	701418	702804	1000	-	.	gene_id "MSTRG.25496"; transcript_id "MSTRG.25496.1"; exon_number "3";
8	StringTie	transcript	1382236	1387511	1000	-	.	gene_id "MSTRG.25518"; transcript_id "MSTRG.25518.1";
8	StringTie	exon	1382236	1382810	1000	-	.	gene_id "MSTRG.25518"; transcript_id "MSTRG.25518.1"; exon_number "1";
8	StringTie	exon	1386718	1387511	1000	-	.	gene_id "MSTRG.25518"; transcript_id "MSTRG.25518.1"; exon_number "2";
8	StringTie	transcript	1382348	1387607	1000	-	.	gene_id "MSTRG.25518"; transcript_id "MSTRG.25518.2";
8	StringTie	exon	1382348	1382810	1000	-	.	gene_id "MSTRG.25518"; transcript_id "MSTRG.25518.2"; exon_number "1";
8	StringTie	exon	1382907	1383122	1000	-	.	gene_id "MSTRG.25518"; transcript_id "MSTRG.25518.2"; exon_number "2";
8	StringTie	exon	1386949	1387607	1000	-	.	gene_id "MSTRG.25518"; transcript_id "MSTRG.25518.2"; exon_number "3";
8	StringTie	transcript	1382411	1387524	1000	-	.	gene_id "MSTRG.25518"; transcript_id "MSTRG.25518.3";
8	StringTie	exon	1382411	1382810	1000	-	.	gene_id "MSTRG.25518"; transcript_id "MSTRG.25518.3"; exon_number "1";
8	StringTie	exon	1386949	1387524	1000	-	.	gene_id "MSTRG.25518"; transcript_id "MSTRG.25518.3"; exon_number "2";
8	StringTie	transcript	1382411	1387524	1000	-	.	gene_id "MSTRG.25518"; transcript_id "MSTRG.25518.4";
8	StringTie	exon	1382411	1382810	1000	-	.	gene_id "MSTRG.25518"; transcript_id "MSTRG.25518.4"; exon_number "1";
8	StringTie	exon	1382907	1383122	1000	-	.	gene_id "MSTRG.25518"; transcript_id "MSTRG.25518.4"; exon_number "2";
8	StringTie	exon	1386718	1387524	1000	-	.	gene_id "MSTRG.25518"; transcript_id "MSTRG.25518.4"; exon_number "3";
8	StringTie	transcript	3764928	3768977	1000	-	.	gene_id "MSTRG.25552"; transcript_id "MSTRG.25552.1";
8	StringTie	exon	3764928	3765306	1000	-	.	gene_id "MSTRG.25552"; transcript_id "MSTRG.25552.1"; exon_number "1";
8	StringTie	exon	3768815	3768977	1000	-	.	gene_id "MSTRG.25552"; transcript_id "MSTRG.25552.1"; exon_number "2";
8	StringTie	transcript	3764939	3768977	1000	-	.	gene_id "MSTRG.25552"; transcript_id "MSTRG.25552.2";
8	StringTie	exon	3764939	3765306	1000	-	.	gene_id "MSTRG.25552"; transcript_id "MSTRG.25552.2"; exon_number "1";
8	StringTie	exon	3768365	3768435	1000	-	.	gene_id "MSTRG.25552"; transcript_id "MSTRG.25552.2"; exon_number "2";
8	StringTie	exon	3768815	3768977	1000	-	.	gene_id "MSTRG.25552"; transcript_id "MSTRG.25552.2"; exon_number "3";
8	StringTie	transcript	7428975	7455050	1000	+	.	gene_id "MSTRG.25599"; transcript_id "MSTRG.25599.1";
8	StringTie	exon	7428975	7429078	1000	+	.	gene_id "MSTRG.25599"; transcript_id "MSTRG.25599.1"; exon_number "1";
8	StringTie	exon	7451274	7451460	1000	+	.	gene_id "MSTRG.25599"; transcript_id "MSTRG.25599.1"; exon_number "2";
8	StringTie	exon	7454972	7455050	1000	+	.	gene_id "MSTRG.25599"; transcript_id "MSTRG.25599.1"; exon_number "3";
8	StringTie	transcript	8562703	8565688	1000	-	.	gene_id "MSTRG.25604"; transcript_id "MSTRG.25604.1";
8	StringTie	exon	8562703	8562803	1000	-	.	gene_id "MSTRG.25604"; transcript_id "MSTRG.25604.1"; exon_number "1";
8	StringTie	exon	8565503	8565688	1000	-	.	gene_id "MSTRG.25604"; transcript_id "MSTRG.25604.1"; exon_number "2";
8	StringTie	transcript	10121358	10142537	1000	-	.	gene_id "MSTRG.25608"; transcript_id "MSTRG.25608.1";
8	StringTie	exon	10121358	10121405	1000	-	.	gene_id "MSTRG.25608"; transcript_id "MSTRG.25608.1"; exon_number "1";
8	StringTie	exon	10142361	10142537	1000	-	.	gene_id "MSTRG.25608"; transcript_id "MSTRG.25608.1"; exon_number "2";
8	StringTie	transcript	12759714	12763969	1000	-	.	gene_id "MSTRG.25648"; transcript_id "MSTRG.25648.1";
8	StringTie	exon	12759714	12759800	1000	-	.	gene_id "MSTRG.25648"; transcript_id "MSTRG.25648.1"; exon_number "1";
8	StringTie	exon	12763585	12763969	1000	-	.	gene_id "MSTRG.25648"; transcript_id "MSTRG.25648.1"; exon_number "2";
8	StringTie	transcript	29838799	29998996	1000	-	.	gene_id "MSTRG.25722"; transcript_id "MSTRG.25722.4";
8	StringTie	exon	29838799	29839451	1000	-	.	gene_id "MSTRG.25722"; transcript_id "MSTRG.25722.4"; exon_number "1";
8	StringTie	exon	29996203	29996320	1000	-	.	gene_id "MSTRG.25722"; transcript_id "MSTRG.25722.4"; exon_number "2";
8	StringTie	exon	29998814	29998996	1000	-	.	gene_id "MSTRG.25722"; transcript_id "MSTRG.25722.4"; exon_number "3";
8	StringTie	transcript	29838945	29888108	1000	-	.	gene_id "MSTRG.25722"; transcript_id "MSTRG.25722.5";
8	StringTie	exon	29838945	29839451	1000	-	.	gene_id "MSTRG.25722"; transcript_id "MSTRG.25722.5"; exon_number "1";
8	StringTie	exon	29888080	29888108	1000	-	.	gene_id "MSTRG.25722"; transcript_id "MSTRG.25722.5"; exon_number "2";
8	StringTie	transcript	30759479	30760139	1000	+	.	gene_id "MSTRG.25742"; transcript_id "MSTRG.25742.1";
8	StringTie	exon	30759479	30759645	1000	+	.	gene_id "MSTRG.25742"; transcript_id "MSTRG.25742.1"; exon_number "1";
8	StringTie	exon	30759824	30760139	1000	+	.	gene_id "MSTRG.25742"; transcript_id "MSTRG.25742.1"; exon_number "2";
8	StringTie	transcript	33048612	33058354	1000	-	.	gene_id "MSTRG.25771"; transcript_id "MSTRG.25771.1";
8	StringTie	exon	33048612	33049417	1000	-	.	gene_id "MSTRG.25771"; transcript_id "MSTRG.25771.1"; exon_number "1";
8	StringTie	exon	33058312	33058354	1000	-	.	gene_id "MSTRG.25771"; transcript_id "MSTRG.25771.1"; exon_number "2";
8	StringTie	transcript	38210112	38227594	1000	-	.	gene_id "MSTRG.25787"; transcript_id "MSTRG.25787.1";
8	StringTie	exon	38210112	38210445	1000	-	.	gene_id "MSTRG.25787"; transcript_id "MSTRG.25787.1"; exon_number "1";
8	StringTie	exon	38227509	38227594	1000	-	.	gene_id "MSTRG.25787"; transcript_id "MSTRG.25787.1"; exon_number "2";
8	StringTie	transcript	43092409	43093376	1000	+	.	gene_id "MSTRG.25838"; transcript_id "MSTRG.25838.2";
8	StringTie	exon	43092409	43093127	1000	+	.	gene_id "MSTRG.25838"; transcript_id "MSTRG.25838.2"; exon_number "1";
8	StringTie	exon	43093238	43093376	1000	+	.	gene_id "MSTRG.25838"; transcript_id "MSTRG.25838.2"; exon_number "2";
8	StringTie	transcript	47007282	47010088	1000	+	.	gene_id "MSTRG.25868"; transcript_id "MSTRG.25868.1";
8	StringTie	exon	47007282	47007349	1000	+	.	gene_id "MSTRG.25868"; transcript_id "MSTRG.25868.1"; exon_number "1";
8	StringTie	exon	47008014	47008127	1000	+	.	gene_id "MSTRG.25868"; transcript_id "MSTRG.25868.1"; exon_number "2";
8	StringTie	exon	47009955	47010088	1000	+	.	gene_id "MSTRG.25868"; transcript_id "MSTRG.25868.1"; exon_number "3";
8	StringTie	transcript	53691712	53693545	1000	-	.	gene_id "MSTRG.25899"; transcript_id "MSTRG.25899.1";
8	StringTie	exon	53691712	53692505	1000	-	.	gene_id "MSTRG.25899"; transcript_id "MSTRG.25899.1"; exon_number "1";
8	StringTie	exon	53692894	53693545	1000	-	.	gene_id "MSTRG.25899"; transcript_id "MSTRG.25899.1"; exon_number "2";
8	StringTie	transcript	64982115	64994310	1000	+	.	gene_id "MSTRG.25934"; transcript_id "MSTRG.25934.1";
8	StringTie	exon	64982115	64982468	1000	+	.	gene_id "MSTRG.25934"; transcript_id "MSTRG.25934.1"; exon_number "1";
8	StringTie	exon	64992531	64994310	1000	+	.	gene_id "MSTRG.25934"; transcript_id "MSTRG.25934.1"; exon_number "2";
8	StringTie	transcript	70610072	70615700	1000	+	.	gene_id "MSTRG.26002"; transcript_id "MSTRG.26002.2";
8	StringTie	exon	70610072	70610362	1000	+	.	gene_id "MSTRG.26002"; transcript_id "MSTRG.26002.2"; exon_number "1";
8	StringTie	exon	70614628	70615700	1000	+	.	gene_id "MSTRG.26002"; transcript_id "MSTRG.26002.2"; exon_number "2";
8	StringTie	transcript	70610072	70620956	1000	+	.	gene_id "MSTRG.26002"; transcript_id "MSTRG.26002.3";
8	StringTie	exon	70610072	70610362	1000	+	.	gene_id "MSTRG.26002"; transcript_id "MSTRG.26002.3"; exon_number "1";
8	StringTie	exon	70620620	70620956	1000	+	.	gene_id "MSTRG.26002"; transcript_id "MSTRG.26002.3"; exon_number "2";
8	StringTie	transcript	71043772	71045146	1000	+	.	gene_id "MSTRG.26020"; transcript_id "MSTRG.26020.1";
8	StringTie	exon	71043772	71043901	1000	+	.	gene_id "MSTRG.26020"; transcript_id "MSTRG.26020.1"; exon_number "1";
8	StringTie	exon	71045032	71045146	1000	+	.	gene_id "MSTRG.26020"; transcript_id "MSTRG.26020.1"; exon_number "2";
8	StringTie	transcript	74651719	74655771	1000	-	.	gene_id "MSTRG.26087"; transcript_id "MSTRG.26087.1";
8	StringTie	exon	74651719	74652534	1000	-	.	gene_id "MSTRG.26087"; transcript_id "MSTRG.26087.1"; exon_number "1";
8	StringTie	exon	74655286	74655771	1000	-	.	gene_id "MSTRG.26087"; transcript_id "MSTRG.26087.1"; exon_number "2";
8	StringTie	transcript	82373367	82376821	1000	-	.	gene_id "MSTRG.26146"; transcript_id "MSTRG.26146.1";
8	StringTie	exon	82373367	82374508	1000	-	.	gene_id "MSTRG.26146"; transcript_id "MSTRG.26146.1"; exon_number "1";
8	StringTie	exon	82376793	82376821	1000	-	.	gene_id "MSTRG.26146"; transcript_id "MSTRG.26146.1"; exon_number "2";
8	StringTie	transcript	82866481	82905126	1000	+	.	gene_id "MSTRG.26176"; transcript_id "MSTRG.26176.1";
8	StringTie	exon	82866481	82866822	1000	+	.	gene_id "MSTRG.26176"; transcript_id "MSTRG.26176.1"; exon_number "1";
8	StringTie	exon	82867651	82867686	1000	+	.	gene_id "MSTRG.26176"; transcript_id "MSTRG.26176.1"; exon_number "2";
8	StringTie	exon	82897343	82897582	1000	+	.	gene_id "MSTRG.26176"; transcript_id "MSTRG.26176.1"; exon_number "3";
8	StringTie	exon	82904844	82905126	1000	+	.	gene_id "MSTRG.26176"; transcript_id "MSTRG.26176.1"; exon_number "4";
8	StringTie	transcript	87459587	87461356	1000	-	.	gene_id "MSTRG.26223"; transcript_id "MSTRG.26223.1";
8	StringTie	exon	87459587	87460067	1000	-	.	gene_id "MSTRG.26223"; transcript_id "MSTRG.26223.1"; exon_number "1";
8	StringTie	exon	87460710	87460856	1000	-	.	gene_id "MSTRG.26223"; transcript_id "MSTRG.26223.1"; exon_number "2";
8	StringTie	exon	87461001	87461098	1000	-	.	gene_id "MSTRG.26223"; transcript_id "MSTRG.26223.1"; exon_number "3";
8	StringTie	exon	87461190	87461356	1000	-	.	gene_id "MSTRG.26223"; transcript_id "MSTRG.26223.1"; exon_number "4";
8	StringTie	transcript	87459587	87461356	1000	-	.	gene_id "MSTRG.26223"; transcript_id "MSTRG.26223.2";
8	StringTie	exon	87459587	87460067	1000	-	.	gene_id "MSTRG.26223"; transcript_id "MSTRG.26223.2"; exon_number "1";
8	StringTie	exon	87460710	87460856	1000	-	.	gene_id "MSTRG.26223"; transcript_id "MSTRG.26223.2"; exon_number "2";
8	StringTie	exon	87461001	87461098	1000	-	.	gene_id "MSTRG.26223"; transcript_id "MSTRG.26223.2"; exon_number "3";
8	StringTie	exon	87461195	87461356	1000	-	.	gene_id "MSTRG.26223"; transcript_id "MSTRG.26223.2"; exon_number "4";
8	StringTie	transcript	87459587	87461355	1000	-	.	gene_id "MSTRG.26223"; transcript_id "MSTRG.26223.3";
8	StringTie	exon	87459587	87460067	1000	-	.	gene_id "MSTRG.26223"; transcript_id "MSTRG.26223.3"; exon_number "1";
8	StringTie	exon	87460710	87460856	1000	-	.	gene_id "MSTRG.26223"; transcript_id "MSTRG.26223.3"; exon_number "2";
8	StringTie	exon	87461001	87461098	1000	-	.	gene_id "MSTRG.26223"; transcript_id "MSTRG.26223.3"; exon_number "3";
8	StringTie	exon	87461249	87461355	1000	-	.	gene_id "MSTRG.26223"; transcript_id "MSTRG.26223.3"; exon_number "4";
8	StringTie	transcript	87459587	87464725	1000	-	.	gene_id "MSTRG.26223"; transcript_id "MSTRG.26223.4";
8	StringTie	exon	87459587	87460067	1000	-	.	gene_id "MSTRG.26223"; transcript_id "MSTRG.26223.4"; exon_number "1";
8	StringTie	exon	87460710	87460856	1000	-	.	gene_id "MSTRG.26223"; transcript_id "MSTRG.26223.4"; exon_number "2";
8	StringTie	exon	87461001	87461098	1000	-	.	gene_id "MSTRG.26223"; transcript_id "MSTRG.26223.4"; exon_number "3";
8	StringTie	exon	87464283	87464348	1000	-	.	gene_id "MSTRG.26223"; transcript_id "MSTRG.26223.4"; exon_number "4";
8	StringTie	exon	87464522	87464725	1000	-	.	gene_id "MSTRG.26223"; transcript_id "MSTRG.26223.4"; exon_number "5";
8	StringTie	transcript	87459587	87461345	1000	-	.	gene_id "MSTRG.26223"; transcript_id "MSTRG.26223.5";
8	StringTie	exon	87459587	87460067	1000	-	.	gene_id "MSTRG.26223"; transcript_id "MSTRG.26223.5"; exon_number "1";
8	StringTie	exon	87461001	87461098	1000	-	.	gene_id "MSTRG.26223"; transcript_id "MSTRG.26223.5"; exon_number "2";
8	StringTie	exon	87461249	87461345	1000	-	.	gene_id "MSTRG.26223"; transcript_id "MSTRG.26223.5"; exon_number "3";
8	StringTie	transcript	87459587	87464725	1000	-	.	gene_id "MSTRG.26223"; transcript_id "MSTRG.26223.6";
8	StringTie	exon	87459587	87460067	1000	-	.	gene_id "MSTRG.26223"; transcript_id "MSTRG.26223.6"; exon_number "1";
8	StringTie	exon	87461001	87461098	1000	-	.	gene_id "MSTRG.26223"; transcript_id "MSTRG.26223.6"; exon_number "2";
8	StringTie	exon	87463798	87463858	1000	-	.	gene_id "MSTRG.26223"; transcript_id "MSTRG.26223.6"; exon_number "3";
8	StringTie	exon	87464283	87464348	1000	-	.	gene_id "MSTRG.26223"; transcript_id "MSTRG.26223.6"; exon_number "4";
8	StringTie	exon	87464522	87464725	1000	-	.	gene_id "MSTRG.26223"; transcript_id "MSTRG.26223.6"; exon_number "5";
8	StringTie	transcript	87459587	87464575	1000	-	.	gene_id "MSTRG.26223"; transcript_id "MSTRG.26223.7";
8	StringTie	exon	87459587	87460067	1000	-	.	gene_id "MSTRG.26223"; transcript_id "MSTRG.26223.7"; exon_number "1";
8	StringTie	exon	87460710	87460856	1000	-	.	gene_id "MSTRG.26223"; transcript_id "MSTRG.26223.7"; exon_number "2";
8	StringTie	exon	87461001	87461098	1000	-	.	gene_id "MSTRG.26223"; transcript_id "MSTRG.26223.7"; exon_number "3";
8	StringTie	exon	87463798	87463858	1000	-	.	gene_id "MSTRG.26223"; transcript_id "MSTRG.26223.7"; exon_number "4";
8	StringTie	exon	87464283	87464348	1000	-	.	gene_id "MSTRG.26223"; transcript_id "MSTRG.26223.7"; exon_number "5";
8	StringTie	exon	87464522	87464575	1000	-	.	gene_id "MSTRG.26223"; transcript_id "MSTRG.26223.7"; exon_number "6";
8	StringTie	transcript	87459587	87461338	1000	-	.	gene_id "MSTRG.26223"; transcript_id "MSTRG.26223.8";
8	StringTie	exon	87459587	87460067	1000	-	.	gene_id "MSTRG.26223"; transcript_id "MSTRG.26223.8"; exon_number "1";
8	StringTie	exon	87460710	87460856	1000	-	.	gene_id "MSTRG.26223"; transcript_id "MSTRG.26223.8"; exon_number "2";
8	StringTie	exon	87461001	87461101	1000	-	.	gene_id "MSTRG.26223"; transcript_id "MSTRG.26223.8"; exon_number "3";
8	StringTie	exon	87461195	87461338	1000	-	.	gene_id "MSTRG.26223"; transcript_id "MSTRG.26223.8"; exon_number "4";
8	StringTie	transcript	87459593	87461338	1000	-	.	gene_id "MSTRG.26223"; transcript_id "MSTRG.26223.9";
8	StringTie	exon	87459593	87460067	1000	-	.	gene_id "MSTRG.26223"; transcript_id "MSTRG.26223.9"; exon_number "1";
8	StringTie	exon	87461001	87461101	1000	-	.	gene_id "MSTRG.26223"; transcript_id "MSTRG.26223.9"; exon_number "2";
8	StringTie	exon	87461249	87461338	1000	-	.	gene_id "MSTRG.26223"; transcript_id "MSTRG.26223.9"; exon_number "3";
8	StringTie	transcript	87459606	87464371	1000	-	.	gene_id "MSTRG.26223"; transcript_id "MSTRG.26223.10";
8	StringTie	exon	87459606	87460067	1000	-	.	gene_id "MSTRG.26223"; transcript_id "MSTRG.26223.10"; exon_number "1";
8	StringTie	exon	87460710	87460856	1000	-	.	gene_id "MSTRG.26223"; transcript_id "MSTRG.26223.10"; exon_number "2";
8	StringTie	exon	87461001	87461101	1000	-	.	gene_id "MSTRG.26223"; transcript_id "MSTRG.26223.10"; exon_number "3";
8	StringTie	exon	87463798	87463858	1000	-	.	gene_id "MSTRG.26223"; transcript_id "MSTRG.26223.10"; exon_number "4";
8	StringTie	exon	87464283	87464371	1000	-	.	gene_id "MSTRG.26223"; transcript_id "MSTRG.26223.10"; exon_number "5";
8	StringTie	transcript	87459611	87464588	1000	-	.	gene_id "MSTRG.26223"; transcript_id "MSTRG.26223.11";
8	StringTie	exon	87459611	87460067	1000	-	.	gene_id "MSTRG.26223"; transcript_id "MSTRG.26223.11"; exon_number "1";
8	StringTie	exon	87461001	87461101	1000	-	.	gene_id "MSTRG.26223"; transcript_id "MSTRG.26223.11"; exon_number "2";
8	StringTie	exon	87464283	87464348	1000	-	.	gene_id "MSTRG.26223"; transcript_id "MSTRG.26223.11"; exon_number "3";
8	StringTie	exon	87464522	87464588	1000	-	.	gene_id "MSTRG.26223"; transcript_id "MSTRG.26223.11"; exon_number "4";
8	StringTie	transcript	87581468	87585377	1000	+	.	gene_id "MSTRG.26227"; transcript_id "MSTRG.26227.3";
8	StringTie	exon	87581468	87581536	1000	+	.	gene_id "MSTRG.26227"; transcript_id "MSTRG.26227.3"; exon_number "1";
8	StringTie	exon	87584914	87585377	1000	+	.	gene_id "MSTRG.26227"; transcript_id "MSTRG.26227.3"; exon_number "2";
8	StringTie	transcript	96352024	96540550	1000	-	.	gene_id "MSTRG.26248"; transcript_id "MSTRG.26248.15";
8	StringTie	exon	96352024	96352062	1000	-	.	gene_id "MSTRG.26248"; transcript_id "MSTRG.26248.15"; exon_number "1";
8	StringTie	exon	96355868	96355923	1000	-	.	gene_id "MSTRG.26248"; transcript_id "MSTRG.26248.15"; exon_number "2";
8	StringTie	exon	96434347	96434474	1000	-	.	gene_id "MSTRG.26248"; transcript_id "MSTRG.26248.15"; exon_number "3";
8	StringTie	exon	96540484	96540550	1000	-	.	gene_id "MSTRG.26248"; transcript_id "MSTRG.26248.15"; exon_number "4";
8	StringTie	transcript	102429781	102444053	1000	+	.	gene_id "MSTRG.26297"; transcript_id "MSTRG.26297.1";
8	StringTie	exon	102429781	102431618	1000	+	.	gene_id "MSTRG.26297"; transcript_id "MSTRG.26297.1"; exon_number "1";
8	StringTie	exon	102443990	102444053	1000	+	.	gene_id "MSTRG.26297"; transcript_id "MSTRG.26297.1"; exon_number "2";
8	StringTie	transcript	104483271	104494130	1000	-	.	gene_id "MSTRG.26318"; transcript_id "MSTRG.26318.11";
8	StringTie	exon	104483271	104483333	1000	-	.	gene_id "MSTRG.26318"; transcript_id "MSTRG.26318.11"; exon_number "1";
8	StringTie	exon	104489701	104489812	1000	-	.	gene_id "MSTRG.26318"; transcript_id "MSTRG.26318.11"; exon_number "2";
8	StringTie	exon	104494040	104494130	1000	-	.	gene_id "MSTRG.26318"; transcript_id "MSTRG.26318.11"; exon_number "3";
8	StringTie	transcript	110226309	110237239	1000	-	.	gene_id "MSTRG.26338"; transcript_id "MSTRG.26338.1";
8	StringTie	exon	110226309	110226373	1000	-	.	gene_id "MSTRG.26338"; transcript_id "MSTRG.26338.1"; exon_number "1";
8	StringTie	exon	110236744	110236858	1000	-	.	gene_id "MSTRG.26338"; transcript_id "MSTRG.26338.1"; exon_number "2";
8	StringTie	exon	110237110	110237239	1000	-	.	gene_id "MSTRG.26338"; transcript_id "MSTRG.26338.1"; exon_number "3";
8	StringTie	transcript	111259214	111264168	1000	-	.	gene_id "MSTRG.26354"; transcript_id "MSTRG.26354.1";
8	StringTie	exon	111259214	111259567	1000	-	.	gene_id "MSTRG.26354"; transcript_id "MSTRG.26354.1"; exon_number "1";
8	StringTie	exon	111263855	111264168	1000	-	.	gene_id "MSTRG.26354"; transcript_id "MSTRG.26354.1"; exon_number "2";
8	StringTie	transcript	112014378	112016436	1000	-	.	gene_id "MSTRG.26359"; transcript_id "MSTRG.26359.1";
8	StringTie	exon	112014378	112015021	1000	-	.	gene_id "MSTRG.26359"; transcript_id "MSTRG.26359.1"; exon_number "1";
8	StringTie	exon	112016351	112016436	1000	-	.	gene_id "MSTRG.26359"; transcript_id "MSTRG.26359.1"; exon_number "2";
8	StringTie	transcript	112016283	112028200	1000	-	.	gene_id "MSTRG.26359"; transcript_id "MSTRG.26359.2";
8	StringTie	exon	112016283	112016435	1000	-	.	gene_id "MSTRG.26359"; transcript_id "MSTRG.26359.2"; exon_number "1";
8	StringTie	exon	112017025	112017167	1000	-	.	gene_id "MSTRG.26359"; transcript_id "MSTRG.26359.2"; exon_number "2";
8	StringTie	exon	112028082	112028200	1000	-	.	gene_id "MSTRG.26359"; transcript_id "MSTRG.26359.2"; exon_number "3";
8	StringTie	transcript	114011385	114012340	1000	-	.	gene_id "MSTRG.26384"; transcript_id "MSTRG.26384.1";
8	StringTie	exon	114011385	114011561	1000	-	.	gene_id "MSTRG.26384"; transcript_id "MSTRG.26384.1"; exon_number "1";
8	StringTie	exon	114012136	114012340	1000	-	.	gene_id "MSTRG.26384"; transcript_id "MSTRG.26384.1"; exon_number "2";
8	StringTie	transcript	114146002	114146925	1000	+	.	gene_id "MSTRG.26392"; transcript_id "MSTRG.26392.1";
8	StringTie	exon	114146002	114146144	1000	+	.	gene_id "MSTRG.26392"; transcript_id "MSTRG.26392.1"; exon_number "1";
8	StringTie	exon	114146846	114146925	1000	+	.	gene_id "MSTRG.26392"; transcript_id "MSTRG.26392.1"; exon_number "2";
8	StringTie	transcript	119424695	119429094	1000	-	.	gene_id "MSTRG.26442"; transcript_id "MSTRG.26442.1";
8	StringTie	exon	119424695	119426794	1000	-	.	gene_id "MSTRG.26442"; transcript_id "MSTRG.26442.1"; exon_number "1";
8	StringTie	exon	119428353	119428493	1000	-	.	gene_id "MSTRG.26442"; transcript_id "MSTRG.26442.1"; exon_number "2";
8	StringTie	exon	119428780	119429094	1000	-	.	gene_id "MSTRG.26442"; transcript_id "MSTRG.26442.1"; exon_number "3";
8	StringTie	transcript	119425070	119429010	1000	-	.	gene_id "MSTRG.26442"; transcript_id "MSTRG.26442.3";
8	StringTie	exon	119425070	119426794	1000	-	.	gene_id "MSTRG.26442"; transcript_id "MSTRG.26442.3"; exon_number "1";
8	StringTie	exon	119428353	119428493	1000	-	.	gene_id "MSTRG.26442"; transcript_id "MSTRG.26442.3"; exon_number "2";
8	StringTie	exon	119428969	119429010	1000	-	.	gene_id "MSTRG.26442"; transcript_id "MSTRG.26442.3"; exon_number "3";
8	StringTie	transcript	119427624	119429010	1000	-	.	gene_id "MSTRG.26442"; transcript_id "MSTRG.26442.4";
8	StringTie	exon	119427624	119427990	1000	-	.	gene_id "MSTRG.26442"; transcript_id "MSTRG.26442.4"; exon_number "1";
8	StringTie	exon	119428353	119428493	1000	-	.	gene_id "MSTRG.26442"; transcript_id "MSTRG.26442.4"; exon_number "2";
8	StringTie	exon	119428969	119429010	1000	-	.	gene_id "MSTRG.26442"; transcript_id "MSTRG.26442.4"; exon_number "3";
8	StringTie	transcript	125293069	125294142	1000	+	.	gene_id "MSTRG.26480"; transcript_id "MSTRG.26480.1";
8	StringTie	exon	125293069	125293142	1000	+	.	gene_id "MSTRG.26480"; transcript_id "MSTRG.26480.1"; exon_number "1";
8	StringTie	exon	125293930	125294142	1000	+	.	gene_id "MSTRG.26480"; transcript_id "MSTRG.26480.1"; exon_number "2";
8	StringTie	transcript	128953516	128959890	1000	+	.	gene_id "MSTRG.26494"; transcript_id "MSTRG.26494.1";
8	StringTie	exon	128953516	128953588	1000	+	.	gene_id "MSTRG.26494"; transcript_id "MSTRG.26494.1"; exon_number "1";
8	StringTie	exon	128959552	128959890	1000	+	.	gene_id "MSTRG.26494"; transcript_id "MSTRG.26494.1"; exon_number "2";
8	StringTie	transcript	130468231	130471517	1000	+	.	gene_id "MSTRG.26511"; transcript_id "MSTRG.26511.1";
8	StringTie	exon	130468231	130468278	1000	+	.	gene_id "MSTRG.26511"; transcript_id "MSTRG.26511.1"; exon_number "1";
8	StringTie	exon	130470334	130471517	1000	+	.	gene_id "MSTRG.26511"; transcript_id "MSTRG.26511.1"; exon_number "2";
8	StringTie	transcript	130740531	130748043	1000	-	.	gene_id "MSTRG.26512"; transcript_id "MSTRG.26512.1";
8	StringTie	exon	130740531	130740609	1000	-	.	gene_id "MSTRG.26512"; transcript_id "MSTRG.26512.1"; exon_number "1";
8	StringTie	exon	130747616	130748043	1000	-	.	gene_id "MSTRG.26512"; transcript_id "MSTRG.26512.1"; exon_number "2";
8	StringTie	transcript	135420866	135428701	1000	+	.	gene_id "MSTRG.26595"; transcript_id "MSTRG.26595.5";
8	StringTie	exon	135420866	135421042	1000	+	.	gene_id "MSTRG.26595"; transcript_id "MSTRG.26595.5"; exon_number "1";
8	StringTie	exon	135421180	135421328	1000	+	.	gene_id "MSTRG.26595"; transcript_id "MSTRG.26595.5"; exon_number "2";
8	StringTie	exon	135423843	135424367	1000	+	.	gene_id "MSTRG.26595"; transcript_id "MSTRG.26595.5"; exon_number "3";
8	StringTie	exon	135426086	135426180	1000	+	.	gene_id "MSTRG.26595"; transcript_id "MSTRG.26595.5"; exon_number "4";
8	StringTie	exon	135426403	135426542	1000	+	.	gene_id "MSTRG.26595"; transcript_id "MSTRG.26595.5"; exon_number "5";
8	StringTie	exon	135426893	135428701	1000	+	.	gene_id "MSTRG.26595"; transcript_id "MSTRG.26595.5"; exon_number "6";
9	StringTie	transcript	254180	262872	1000	+	.	gene_id "MSTRG.26607"; transcript_id "MSTRG.26607.1";
9	StringTie	exon	254180	255500	1000	+	.	gene_id "MSTRG.26607"; transcript_id "MSTRG.26607.1"; exon_number "1";
9	StringTie	exon	262709	262872	1000	+	.	gene_id "MSTRG.26607"; transcript_id "MSTRG.26607.1"; exon_number "2";
9	StringTie	transcript	3341514	3351229	1000	+	.	gene_id "MSTRG.26663"; transcript_id "MSTRG.26663.1";
9	StringTie	exon	3341514	3341840	1000	+	.	gene_id "MSTRG.26663"; transcript_id "MSTRG.26663.1"; exon_number "1";
9	StringTie	exon	3350892	3351229	1000	+	.	gene_id "MSTRG.26663"; transcript_id "MSTRG.26663.1"; exon_number "2";
9	StringTie	transcript	3341626	3345373	1000	+	.	gene_id "MSTRG.26663"; transcript_id "MSTRG.26663.2";
9	StringTie	exon	3341626	3341840	1000	+	.	gene_id "MSTRG.26663"; transcript_id "MSTRG.26663.2"; exon_number "1";
9	StringTie	exon	3342625	3342818	1000	+	.	gene_id "MSTRG.26663"; transcript_id "MSTRG.26663.2"; exon_number "2";
9	StringTie	exon	3342916	3345373	1000	+	.	gene_id "MSTRG.26663"; transcript_id "MSTRG.26663.2"; exon_number "3";
9	StringTie	transcript	3341663	3343378	1000	+	.	gene_id "MSTRG.26663"; transcript_id "MSTRG.26663.3";
9	StringTie	exon	3341663	3341840	1000	+	.	gene_id "MSTRG.26663"; transcript_id "MSTRG.26663.3"; exon_number "1";
9	StringTie	exon	3342916	3343378	1000	+	.	gene_id "MSTRG.26663"; transcript_id "MSTRG.26663.3"; exon_number "2";
9	StringTie	transcript	3164798	3169487	1000	-	.	gene_id "MSTRG.26685"; transcript_id "MSTRG.26685.1";
9	StringTie	exon	3164798	3167514	1000	-	.	gene_id "MSTRG.26685"; transcript_id "MSTRG.26685.1"; exon_number "1";
9	StringTie	exon	3167537	3169487	1000	-	.	gene_id "MSTRG.26685"; transcript_id "MSTRG.26685.1"; exon_number "2";
9	StringTie	transcript	7339489	7346784	1000	-	.	gene_id "MSTRG.26727"; transcript_id "MSTRG.26727.1";
9	StringTie	exon	7339489	7340987	1000	-	.	gene_id "MSTRG.26727"; transcript_id "MSTRG.26727.1"; exon_number "1";
9	StringTie	exon	7345980	7346784	1000	-	.	gene_id "MSTRG.26727"; transcript_id "MSTRG.26727.1"; exon_number "2";
9	StringTie	transcript	8796012	8809280	1000	+	.	gene_id "MSTRG.26769"; transcript_id "MSTRG.26769.3";
9	StringTie	exon	8796012	8796145	1000	+	.	gene_id "MSTRG.26769"; transcript_id "MSTRG.26769.3"; exon_number "1";
9	StringTie	exon	8807788	8809280	1000	+	.	gene_id "MSTRG.26769"; transcript_id "MSTRG.26769.3"; exon_number "2";
9	StringTie	transcript	8804797	8809287	1000	+	.	gene_id "MSTRG.26769"; transcript_id "MSTRG.26769.5";
9	StringTie	exon	8804797	8804954	1000	+	.	gene_id "MSTRG.26769"; transcript_id "MSTRG.26769.5"; exon_number "1";
9	StringTie	exon	8807690	8809287	1000	+	.	gene_id "MSTRG.26769"; transcript_id "MSTRG.26769.5"; exon_number "2";
9	StringTie	transcript	9779182	9780683	1000	+	.	gene_id "MSTRG.26793"; transcript_id "MSTRG.26793.2";
9	StringTie	exon	9779182	9779528	1000	+	.	gene_id "MSTRG.26793"; transcript_id "MSTRG.26793.2"; exon_number "1";
9	StringTie	exon	9780043	9780683	1000	+	.	gene_id "MSTRG.26793"; transcript_id "MSTRG.26793.2"; exon_number "2";
9	StringTie	transcript	10827899	10828787	1000	+	.	gene_id "MSTRG.26835"; transcript_id "MSTRG.26835.1";
9	StringTie	exon	10827899	10827923	1000	+	.	gene_id "MSTRG.26835"; transcript_id "MSTRG.26835.1"; exon_number "1";
9	StringTie	exon	10828269	10828787	1000	+	.	gene_id "MSTRG.26835"; transcript_id "MSTRG.26835.1"; exon_number "2";
9	StringTie	transcript	10591099	10627921	1000	-	.	gene_id "MSTRG.26848"; transcript_id "MSTRG.26848.1";
9	StringTie	exon	10591099	10591437	1000	-	.	gene_id "MSTRG.26848"; transcript_id "MSTRG.26848.1"; exon_number "1";
9	StringTie	exon	10617033	10617232	1000	-	.	gene_id "MSTRG.26848"; transcript_id "MSTRG.26848.1"; exon_number "2";
9	StringTie	exon	10627534	10627921	1000	-	.	gene_id "MSTRG.26848"; transcript_id "MSTRG.26848.1"; exon_number "3";
9	StringTie	transcript	12017034	12021088	1000	-	.	gene_id "MSTRG.26869"; transcript_id "MSTRG.26869.1";
9	StringTie	exon	12017034	12017124	1000	-	.	gene_id "MSTRG.26869"; transcript_id "MSTRG.26869.1"; exon_number "1";
9	StringTie	exon	12020365	12020483	1000	-	.	gene_id "MSTRG.26869"; transcript_id "MSTRG.26869.1"; exon_number "2";
9	StringTie	exon	12020925	12021088	1000	-	.	gene_id "MSTRG.26869"; transcript_id "MSTRG.26869.1"; exon_number "3";
9	StringTie	transcript	15472919	15480869	1000	+	.	gene_id "MSTRG.26899"; transcript_id "MSTRG.26899.1";
9	StringTie	exon	15472919	15473066	1000	+	.	gene_id "MSTRG.26899"; transcript_id "MSTRG.26899.1"; exon_number "1";
9	StringTie	exon	15474925	15474997	1000	+	.	gene_id "MSTRG.26899"; transcript_id "MSTRG.26899.1"; exon_number "2";
9	StringTie	exon	15480827	15480869	1000	+	.	gene_id "MSTRG.26899"; transcript_id "MSTRG.26899.1"; exon_number "3";
9	StringTie	transcript	20034428	20036571	1000	+	.	gene_id "MSTRG.26941"; transcript_id "MSTRG.26941.1";
9	StringTie	exon	20034428	20034641	1000	+	.	gene_id "MSTRG.26941"; transcript_id "MSTRG.26941.1"; exon_number "1";
9	StringTie	exon	20036261	20036571	1000	+	.	gene_id "MSTRG.26941"; transcript_id "MSTRG.26941.1"; exon_number "2";
9	StringTie	transcript	20034470	20044184	1000	+	.	gene_id "MSTRG.26941"; transcript_id "MSTRG.26941.2";
9	StringTie	exon	20034470	20034641	1000	+	.	gene_id "MSTRG.26941"; transcript_id "MSTRG.26941.2"; exon_number "1";
9	StringTie	exon	20039480	20039574	1000	+	.	gene_id "MSTRG.26941"; transcript_id "MSTRG.26941.2"; exon_number "2";
9	StringTie	exon	20042362	20042472	1000	+	.	gene_id "MSTRG.26941"; transcript_id "MSTRG.26941.2"; exon_number "3";
9	StringTie	exon	20042757	20044184	1000	+	.	gene_id "MSTRG.26941"; transcript_id "MSTRG.26941.2"; exon_number "4";
9	StringTie	transcript	21827402	21843581	1000	+	.	gene_id "MSTRG.26947"; transcript_id "MSTRG.26947.1";
9	StringTie	exon	21827402	21827435	1000	+	.	gene_id "MSTRG.26947"; transcript_id "MSTRG.26947.1"; exon_number "1";
9	StringTie	exon	21832756	21832965	1000	+	.	gene_id "MSTRG.26947"; transcript_id "MSTRG.26947.1"; exon_number "2";
9	StringTie	exon	21837617	21837743	1000	+	.	gene_id "MSTRG.26947"; transcript_id "MSTRG.26947.1"; exon_number "3";
9	StringTie	exon	21843500	21843581	1000	+	.	gene_id "MSTRG.26947"; transcript_id "MSTRG.26947.1"; exon_number "4";
9	StringTie	transcript	26790694	26803845	1000	-	.	gene_id "MSTRG.27004"; transcript_id "MSTRG.27004.1";
9	StringTie	exon	26790694	26790921	1000	-	.	gene_id "MSTRG.27004"; transcript_id "MSTRG.27004.1"; exon_number "1";
9	StringTie	exon	26803727	26803845	1000	-	.	gene_id "MSTRG.27004"; transcript_id "MSTRG.27004.1"; exon_number "2";
9	StringTie	transcript	26986237	26993435	1000	+	.	gene_id "MSTRG.27011"; transcript_id "MSTRG.27011.1";
9	StringTie	exon	26986237	26986355	1000	+	.	gene_id "MSTRG.27011"; transcript_id "MSTRG.27011.1"; exon_number "1";
9	StringTie	exon	26993312	26993435	1000	+	.	gene_id "MSTRG.27011"; transcript_id "MSTRG.27011.1"; exon_number "2";
9	StringTie	transcript	27118065	27122127	1000	-	.	gene_id "MSTRG.27017"; transcript_id "MSTRG.27017.1";
9	StringTie	exon	27118065	27118705	1000	-	.	gene_id "MSTRG.27017"; transcript_id "MSTRG.27017.1"; exon_number "1";
9	StringTie	exon	27122073	27122127	1000	-	.	gene_id "MSTRG.27017"; transcript_id "MSTRG.27017.1"; exon_number "2";
9	StringTie	transcript	34086417	34097987	1000	+	.	gene_id "MSTRG.27063"; transcript_id "MSTRG.27063.1";
9	StringTie	exon	34086417	34086584	1000	+	.	gene_id "MSTRG.27063"; transcript_id "MSTRG.27063.1"; exon_number "1";
9	StringTie	exon	34097458	34097987	1000	+	.	gene_id "MSTRG.27063"; transcript_id "MSTRG.27063.1"; exon_number "2";
9	StringTie	transcript	35953435	35958704	1000	-	.	gene_id "MSTRG.27078"; transcript_id "MSTRG.27078.2";
9	StringTie	exon	35953435	35953468	1000	-	.	gene_id "MSTRG.27078"; transcript_id "MSTRG.27078.2"; exon_number "1";
9	StringTie	exon	35955131	35955222	1000	-	.	gene_id "MSTRG.27078"; transcript_id "MSTRG.27078.2"; exon_number "2";
9	StringTie	exon	35956879	35956970	1000	-	.	gene_id "MSTRG.27078"; transcript_id "MSTRG.27078.2"; exon_number "3";
9	StringTie	exon	35958635	35958704	1000	-	.	gene_id "MSTRG.27078"; transcript_id "MSTRG.27078.2"; exon_number "4";
9	StringTie	transcript	39519241	39528213	1000	-	.	gene_id "MSTRG.27130"; transcript_id "MSTRG.27130.1";
9	StringTie	exon	39519241	39522870	1000	-	.	gene_id "MSTRG.27130"; transcript_id "MSTRG.27130.1"; exon_number "1";
9	StringTie	exon	39527883	39528213	1000	-	.	gene_id "MSTRG.27130"; transcript_id "MSTRG.27130.1"; exon_number "2";
9	StringTie	transcript	42098618	42100705	1000	+	.	gene_id "MSTRG.27166"; transcript_id "MSTRG.27166.1";
9	StringTie	exon	42098618	42098734	1000	+	.	gene_id "MSTRG.27166"; transcript_id "MSTRG.27166.1"; exon_number "1";
9	StringTie	exon	42100543	42100705	1000	+	.	gene_id "MSTRG.27166"; transcript_id "MSTRG.27166.1"; exon_number "2";
9	StringTie	transcript	42102094	42104425	1000	+	.	gene_id "MSTRG.27182"; transcript_id "MSTRG.27182.1";
9	StringTie	exon	42102094	42102280	1000	+	.	gene_id "MSTRG.27182"; transcript_id "MSTRG.27182.1"; exon_number "1";
9	StringTie	exon	42103970	42104425	1000	+	.	gene_id "MSTRG.27182"; transcript_id "MSTRG.27182.1"; exon_number "2";
9	StringTie	transcript	41625246	41639401	1000	-	.	gene_id "MSTRG.27184"; transcript_id "MSTRG.27184.4";
9	StringTie	exon	41625246	41626120	1000	-	.	gene_id "MSTRG.27184"; transcript_id "MSTRG.27184.4"; exon_number "1";
9	StringTie	exon	41632309	41632589	1000	-	.	gene_id "MSTRG.27184"; transcript_id "MSTRG.27184.4"; exon_number "2";
9	StringTie	exon	41632894	41633342	1000	-	.	gene_id "MSTRG.27184"; transcript_id "MSTRG.27184.4"; exon_number "3";
9	StringTie	exon	41636157	41636225	1000	-	.	gene_id "MSTRG.27184"; transcript_id "MSTRG.27184.4"; exon_number "4";
9	StringTie	exon	41638166	41639401	1000	-	.	gene_id "MSTRG.27184"; transcript_id "MSTRG.27184.4"; exon_number "5";
9	StringTie	transcript	46637619	46638132	1000	+	.	gene_id "MSTRG.27263"; transcript_id "MSTRG.27263.1";
9	StringTie	exon	46637619	46637750	1000	+	.	gene_id "MSTRG.27263"; transcript_id "MSTRG.27263.1"; exon_number "1";
9	StringTie	exon	46638057	46638132	1000	+	.	gene_id "MSTRG.27263"; transcript_id "MSTRG.27263.1"; exon_number "2";
9	StringTie	transcript	54476726	54499739	1000	+	.	gene_id "MSTRG.27368"; transcript_id "MSTRG.27368.1";
9	StringTie	exon	54476726	54476783	1000	+	.	gene_id "MSTRG.27368"; transcript_id "MSTRG.27368.1"; exon_number "1";
9	StringTie	exon	54476889	54477068	1000	+	.	gene_id "MSTRG.27368"; transcript_id "MSTRG.27368.1"; exon_number "2";
9	StringTie	exon	54497952	54499739	1000	+	.	gene_id "MSTRG.27368"; transcript_id "MSTRG.27368.1"; exon_number "3";
9	StringTie	transcript	56261485	56261797	1000	+	.	gene_id "MSTRG.27385"; transcript_id "MSTRG.27385.1";
9	StringTie	exon	56261485	56261526	1000	+	.	gene_id "MSTRG.27385"; transcript_id "MSTRG.27385.1"; exon_number "1";
9	StringTie	exon	56261547	56261797	1000	+	.	gene_id "MSTRG.27385"; transcript_id "MSTRG.27385.1"; exon_number "2";
9	StringTie	transcript	56177996	56182975	1000	+	.	gene_id "MSTRG.27389"; transcript_id "MSTRG.27389.1";
9	StringTie	exon	56177996	56178047	1000	+	.	gene_id "MSTRG.27389"; transcript_id "MSTRG.27389.1"; exon_number "1";
9	StringTie	exon	56178420	56178500	1000	+	.	gene_id "MSTRG.27389"; transcript_id "MSTRG.27389.1"; exon_number "2";
9	StringTie	exon	56179282	56179417	1000	+	.	gene_id "MSTRG.27389"; transcript_id "MSTRG.27389.1"; exon_number "3";
9	StringTie	exon	56179527	56182975	1000	+	.	gene_id "MSTRG.27389"; transcript_id "MSTRG.27389.1"; exon_number "4";
9	StringTie	transcript	56178166	56182923	1000	+	.	gene_id "MSTRG.27389"; transcript_id "MSTRG.27389.2";
9	StringTie	exon	56178166	56178304	1000	+	.	gene_id "MSTRG.27389"; transcript_id "MSTRG.27389.2"; exon_number "1";
9	StringTie	exon	56178420	56178500	1000	+	.	gene_id "MSTRG.27389"; transcript_id "MSTRG.27389.2"; exon_number "2";
9	StringTie	exon	56179282	56179417	1000	+	.	gene_id "MSTRG.27389"; transcript_id "MSTRG.27389.2"; exon_number "3";
9	StringTie	exon	56179527	56179700	1000	+	.	gene_id "MSTRG.27389"; transcript_id "MSTRG.27389.2"; exon_number "4";
9	StringTie	exon	56180232	56182923	1000	+	.	gene_id "MSTRG.27389"; transcript_id "MSTRG.27389.2"; exon_number "5";
9	StringTie	transcript	67430477	67432553	1000	+	.	gene_id "MSTRG.27488"; transcript_id "MSTRG.27488.1";
9	StringTie	exon	67430477	67430662	1000	+	.	gene_id "MSTRG.27488"; transcript_id "MSTRG.27488.1"; exon_number "1";
9	StringTie	exon	67431198	67431350	1000	+	.	gene_id "MSTRG.27488"; transcript_id "MSTRG.27488.1"; exon_number "2";
9	StringTie	exon	67432464	67432553	1000	+	.	gene_id "MSTRG.27488"; transcript_id "MSTRG.27488.1"; exon_number "3";
9	StringTie	transcript	74570812	74572512	1000	-	.	gene_id "MSTRG.27590"; transcript_id "MSTRG.27590.1";
9	StringTie	exon	74570812	74570853	1000	-	.	gene_id "MSTRG.27590"; transcript_id "MSTRG.27590.1"; exon_number "1";
9	StringTie	exon	74571863	74571955	1000	-	.	gene_id "MSTRG.27590"; transcript_id "MSTRG.27590.1"; exon_number "2";
9	StringTie	exon	74572445	74572512	1000	-	.	gene_id "MSTRG.27590"; transcript_id "MSTRG.27590.1"; exon_number "3";
9	StringTie	transcript	76349315	76432956	1000	+	.	gene_id "MSTRG.27623"; transcript_id "MSTRG.27623.1";
9	StringTie	exon	76349315	76349412	1000	+	.	gene_id "MSTRG.27623"; transcript_id "MSTRG.27623.1"; exon_number "1";
9	StringTie	exon	76352636	76352714	1000	+	.	gene_id "MSTRG.27623"; transcript_id "MSTRG.27623.1"; exon_number "2";
9	StringTie	exon	76432768	76432956	1000	+	.	gene_id "MSTRG.27623"; transcript_id "MSTRG.27623.1"; exon_number "3";
9	StringTie	transcript	81786133	81787300	1000	-	.	gene_id "MSTRG.27640"; transcript_id "MSTRG.27640.1";
9	StringTie	exon	81786133	81786165	1000	-	.	gene_id "MSTRG.27640"; transcript_id "MSTRG.27640.1"; exon_number "1";
9	StringTie	exon	81787132	81787300	1000	-	.	gene_id "MSTRG.27640"; transcript_id "MSTRG.27640.1"; exon_number "2";
9	StringTie	transcript	85014642	85019875	1000	+	.	gene_id "MSTRG.27665"; transcript_id "MSTRG.27665.2";
9	StringTie	exon	85014642	85017897	1000	+	.	gene_id "MSTRG.27665"; transcript_id "MSTRG.27665.2"; exon_number "1";
9	StringTie	exon	85018459	85019875	1000	+	.	gene_id "MSTRG.27665"; transcript_id "MSTRG.27665.2"; exon_number "2";
9	StringTie	transcript	91610252	91644822	1000	+	.	gene_id "MSTRG.27702"; transcript_id "MSTRG.27702.1";
9	StringTie	exon	91610252	91610437	1000	+	.	gene_id "MSTRG.27702"; transcript_id "MSTRG.27702.1"; exon_number "1";
9	StringTie	exon	91644774	91644822	1000	+	.	gene_id "MSTRG.27702"; transcript_id "MSTRG.27702.1"; exon_number "2";
9	StringTie	transcript	88280667	88283992	1000	-	.	gene_id "MSTRG.27709"; transcript_id "MSTRG.27709.1";
9	StringTie	exon	88280667	88281273	1000	-	.	gene_id "MSTRG.27709"; transcript_id "MSTRG.27709.1"; exon_number "1";
9	StringTie	exon	88283960	88283992	1000	-	.	gene_id "MSTRG.27709"; transcript_id "MSTRG.27709.1"; exon_number "2";
9	StringTie	transcript	94792887	94848069	1000	-	.	gene_id "MSTRG.27735"; transcript_id "MSTRG.27735.1";
9	StringTie	exon	94792887	94793662	1000	-	.	gene_id "MSTRG.27735"; transcript_id "MSTRG.27735.1"; exon_number "1";
9	StringTie	exon	94804556	94804685	1000	-	.	gene_id "MSTRG.27735"; transcript_id "MSTRG.27735.1"; exon_number "2";
9	StringTie	exon	94847739	94848069	1000	-	.	gene_id "MSTRG.27735"; transcript_id "MSTRG.27735.1"; exon_number "3";
9	StringTie	transcript	94793023	94851517	1000	-	.	gene_id "MSTRG.27735"; transcript_id "MSTRG.27735.2";
9	StringTie	exon	94793023	94793662	1000	-	.	gene_id "MSTRG.27735"; transcript_id "MSTRG.27735.2"; exon_number "1";
9	StringTie	exon	94804556	94804685	1000	-	.	gene_id "MSTRG.27735"; transcript_id "MSTRG.27735.2"; exon_number "2";
9	StringTie	exon	94851476	94851517	1000	-	.	gene_id "MSTRG.27735"; transcript_id "MSTRG.27735.2"; exon_number "3";
9	StringTie	transcript	94793496	94848040	1000	-	.	gene_id "MSTRG.27735"; transcript_id "MSTRG.27735.3";
9	StringTie	exon	94793496	94793662	1000	-	.	gene_id "MSTRG.27735"; transcript_id "MSTRG.27735.3"; exon_number "1";
9	StringTie	exon	94847739	94848040	1000	-	.	gene_id "MSTRG.27735"; transcript_id "MSTRG.27735.3"; exon_number "2";
9	StringTie	transcript	106634551	106635678	1000	+	.	gene_id "MSTRG.27840"; transcript_id "MSTRG.27840.1";
9	StringTie	exon	106634551	106634830	1000	+	.	gene_id "MSTRG.27840"; transcript_id "MSTRG.27840.1"; exon_number "1";
9	StringTie	exon	106634932	106635678	1000	+	.	gene_id "MSTRG.27840"; transcript_id "MSTRG.27840.1"; exon_number "2";
9	StringTie	transcript	106233389	106294877	1000	-	.	gene_id "MSTRG.27855"; transcript_id "MSTRG.27855.10";
9	StringTie	exon	106233389	106238913	1000	-	.	gene_id "MSTRG.27855"; transcript_id "MSTRG.27855.10"; exon_number "1";
9	StringTie	exon	106294241	106294877	1000	-	.	gene_id "MSTRG.27855"; transcript_id "MSTRG.27855.10"; exon_number "2";
9	StringTie	transcript	106237075	106299715	1000	-	.	gene_id "MSTRG.27855"; transcript_id "MSTRG.27855.11";
9	StringTie	exon	106237075	106238913	1000	-	.	gene_id "MSTRG.27855"; transcript_id "MSTRG.27855.11"; exon_number "1";
9	StringTie	exon	106297911	106298085	1000	-	.	gene_id "MSTRG.27855"; transcript_id "MSTRG.27855.11"; exon_number "2";
9	StringTie	exon	106298403	106299715	1000	-	.	gene_id "MSTRG.27855"; transcript_id "MSTRG.27855.11"; exon_number "3";
9	StringTie	transcript	106275240	106299936	1000	-	.	gene_id "MSTRG.27855"; transcript_id "MSTRG.27855.12";
9	StringTie	exon	106275240	106275306	1000	-	.	gene_id "MSTRG.27855"; transcript_id "MSTRG.27855.12"; exon_number "1";
9	StringTie	exon	106297911	106298019	1000	-	.	gene_id "MSTRG.27855"; transcript_id "MSTRG.27855.12"; exon_number "2";
9	StringTie	exon	106298899	106299936	1000	-	.	gene_id "MSTRG.27855"; transcript_id "MSTRG.27855.12"; exon_number "3";
9	StringTie	transcript	106961548	106963308	1000	+	.	gene_id "MSTRG.27867"; transcript_id "MSTRG.27867.1";
9	StringTie	exon	106961548	106961598	1000	+	.	gene_id "MSTRG.27867"; transcript_id "MSTRG.27867.1"; exon_number "1";
[truncated: 1,901 more rows]
